# Supplementary material for: Nitro – a traceless directing group for reversing the radical site-selectivity of styrene derivatives
Source: Royal Society of Chemistry journal article supplement (doi:10.1039/d3qo01156a), 2023-01-01
Supplement: d3qo01156a1.pdf [file d3qo01156a1.pdf]

## Supporting Information for

### Nitro - a Traceless Directing Group Switching the Site-Selectivity of Styrene Derivatives in [4 + 2] Annulation

Zhenxing Zhang,<sup>†1,2</sup> Xin Zhang,<sup>†3</sup> Yaxin Wang,<sup>2</sup> Yang Liu,<sup>2</sup> Yu Wang,<sup>2</sup> Xinhao Zhang,<sup>3,4\*</sup>  
Junyan Ma,<sup>2\*</sup> and Lijuan Song<sup>2\*</sup>

<sup>1</sup> College of Chemistry and Chemical Engineering, Anyang Normal University, Anyang 455000, China

<sup>2</sup> School of Science, Harbin Institute of Technology (Shenzhen), Shenzhen 518055, China.

<sup>3</sup> Shenzhen Bay Laboratory, Shenzhen 518055, China

<sup>4</sup> Lab of Computational Chemistry and Drug Design, State Key Laboratory of Chemical Oncogenomics, Peking University Shenzhen Graduate School, Shenzhen 518055, China

#### Table of Contents

##### Experimental Section

|                                   |     |
|-----------------------------------|-----|
| General Experimental Details..... | S2  |
| Experimental Procedures.....      | S2  |
| Physical Data.....                | S3  |
| NMR Spectra.....                  | S19 |

##### Computational Section

|                                                                                                                        |     |
|------------------------------------------------------------------------------------------------------------------------|-----|
| Computational Methods.....                                                                                             | S69 |
| <b>Figure S1.</b> Intermediates and Transition States with Relative Free Energies in the Decarboxylation Process ..... | S70 |
| <b>Figure S2.</b> Energy Profile for the Radical Cycloaddition of <b>INT3-4a</b> .....                                 | S71 |
| <b>Figure S3.</b> Energy Profile for the Radical Cycloaddition and Reromatization of <b>INT3-2b</b> .....              | S72 |
| <b>Table S1.</b> Energetics of Computed Intermediates and TSs.....                                                     | S73 |
| Cartesian Coordinates .....                                                                                            | S74 |
| <b>References</b> .....                                                                                                | S99 |

## 1. General information

Unless otherwise noted, chemicals and solvents were purchased with the highest purity grade available and were used without further purification. Purification of products was conducted by column chromatography on silica gel (200-300 mesh, from Qingdao, China). NMR spectra were measured on a Bruker ARX400 ( $^1\text{H}$  at 400 MHz,  $^{13}\text{C}$  at 101 MHz,  $^{19}\text{F}$  at 471 or 376 MHz) magnetic resonance spectrometer. Chemical shifts ( $\delta$ ) are reported in ppm using tetramethylsilane as internal standard (s = singlet, d = doublet, t = triplet, q = quartet, dd = doublet of doublets, td = triplet of doublets, dt = doublet of triplets, ddd = doublet of doublet of doublets, m = multiplet), and coupling constants ( $J$ ) were reported in Hertz (Hz). HRMS data were obtained on a VG ZAB-HS mass spectrometer, Bruker Apex IV FTMS spectrometer.

*The structure of our products were idea derivation of DFT calculations suggested mechanism and identified by comparing known products with literatures.*

the spectra of **3b** are in accordance with those of the compound reported in the literature Adv. Synth. Catal. 2013, 355, 2044 and Org. Lett. 2021, 23, 3593-3598 .

the spectra of **3q** are in accordance with those of the compound reported in the literature Adv. Synth. Catal. 2013, 355, 2044 .

the spectra of **3g** are in accordance with those of the compound reported in the literature J. Med. Chem. 2004, 47, 2574

the spectra of **5g** are in accordance with those of the compound reported in the literature Org.Lett.2020, 22, 2230–2234

the spectra of **5z** are in accordance with those of the compound reported in the literature Synthesis, 2011, # 10, art. no. H19211SS, p. 1547

## 2. General Procedure

### General procedure for the synthesis of quinolones via two-component 4+2 annulation

To a 20 mL test tube with a stir bar was charged with 0.3 mmol alkene **1**, 0.36 mmol oxalic monoamide, 0.03mmol  $\text{AgNO}_3$  and 1.2 mmol  $\text{K}_2\text{S}_2\text{O}_8$  followed by 2mL acquis acetone (v/v 1/1). The resulting mixture was reacted at 65°C overnight. or monitored by TLC. Upon completion, the reaction mixture was concentrated under reduced pressure. The residue was chromatographed through silica gel eluting with PE/EA to give the desired product **3** and **5**.

Substituted 2-(methyl(phenyl)amino)-2-oxoacetic acid (**1**), cinnamate (**2**) and (2-nitroalk-1-en-1-yl)benzene were commercial available from Jiangsu YUNPU New Pharmaceutical Material Technology Co., Ltd.

### Procedure for synthesis of ethyl 2-nitro-3-phenylacrylate

To a round bottom flask were added. To the stirred ice cooled solution of ethyl cinnamate (5.68 mmol) and anhydrous  $\text{CH}_3\text{CN}$  (50 ml) were slowly added  $(\text{NH}_4)_2\text{Ce}(\text{NO}_3)_6$  (17.0 mmol) and  $\text{NaNO}_2$  (17.0 mmol). The reaction mixture was allowed to warm to room temperature naturely and stirred for 22 h, then filtered through Celite and the filter pad was washed with  $\text{CH}_3\text{CN}$ . The combined filtrate and washings were poured into cold water, extracted with

DCM, dried over  $\text{Na}_2\text{SO}_4$ , filtered, and concentrated. The residue was separated by silica gel flash chromatography to offer the ethyl 2-nitro-3-phenylacrylate.

### General procedure for synthesis of (2-nitroalk-1-en-1-yl)benzene

To a stirred mixture solution of aldehyde derivative (10 mmol) and nitroalkane (10 mmol) in methanol (5 mL) at 0 °C was added an aqueous solution of sodium hydroxide (15 mmol) over a period of 30 min. The stirring was continued for another half an hour in the temperature range from 0 to 5 °C. The mixture was allowed to warm to room temperature. Completion of the reaction was confirmed through monitoring by TLC (10–12 h). The post reaction mixture was mixed with water (20 mL) and poured over crushed ice containing concentrated HCl (2 mL). The yellow precipitate was filtered, dried in a vacuum desiccator, and crystallized from hot EtOH. The desired nitroolefins were obtained. Similarly, other nitroolefins were also synthesized.

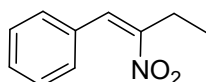

(2-nitrobut-1-en-1-yl)benzene was synthesized following the general procedure, benzaldehyde (1.06 g, 10 mmol) and nitroalkane (0.89 g, 10 mmol), was used to give (2-nitrobut-1-en-1-yl)benzene (0.49 g, 28%). white solid. The spectra are in accordance with those of the compound reported in the literature (European Journal of Organic Chemistry, 2020, vol. 2020, # 26, p. 4059 – 4066).  $^1\text{H}$  NMR (400 MHz,  $\text{CDCl}_3$ )  $\delta$  8.05 (s, 1H), 7.57 – 7.40 (m, 5H), 2.90 (q,  $J$  = 7.4 Hz, 2H), 1.31 (t,  $J$  = 7.4 Hz, 3H).  $^{13}\text{C}$  NMR (101 MHz,  $\text{CDCl}_3$ )  $\delta$  153.37 , 133.15 , 132.42 , 129.99 , 129.66 , 129.02 , 20.75 , 12.53 .

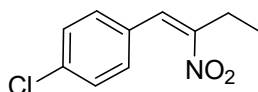

1-chloro-4-(2-nitrobut-1-en-1-yl)benzene was synthesized following the general procedure, 4-chlorobenzaldehyde (1.40 g, 10 mmol) and nitroalkane (0.89 g, 10 mmol), was used to give 1-chloro-4-(2-nitrobut-1-en-1-yl)benzene (0.83 g, 39%). white solid. The spectra are in accordance with those of the compound reported in the literature (Tetrahedron, 2009, vol. 65, # 23, p. 4578 – 4592)  $^1\text{H}$  NMR (400 MHz,  $\text{CDCl}_3$ )  $\delta$  7.97 (s, 1H), 7.44 (d,  $J$  = 8.5 Hz, 2H), 7.35 (d,  $J$  = 8.5 Hz, 2H), 2.84 (q,  $J$  = 7.4 Hz, 2H), 1.28 (t,  $J$  = 7.4 Hz, 4H).  $^{13}\text{C}$  NMR (101 MHz,  $\text{CDCl}_3$ )  $\delta$  153.65 , 136.15 , 131.81 , 130.82 (d,  $J$  = 6.0 Hz), 129.34 , 20.72 , 12.45 .

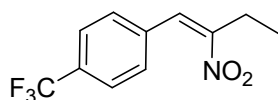

1-(2-nitrobut-1-en-1-yl)-4-(trifluoromethyl)benzene was synthesized following the general procedure, 4-trifluoromethylbenzaldehyde (1.74 g, 10 mmol) and nitroalkane (0.89 g, 10 mmol), was used to give 1-(2-nitrobut-1-en-1-yl)-4-(trifluoromethyl)benzene (0.36 g, 24 %). white solid.  $^1\text{H}$  NMR (400 MHz,  $\text{CDCl}_3$ )  $\delta$  8.01 (s, 1H), 7.72 (d,  $J$  = 8.2 Hz, 2H), 7.52 (d,  $J$  = 8.1 Hz, 2H), 2.84 (q,  $J$  = 7.4 Hz, 2H), 1.28 (t,  $J$  = 7.4 Hz, 4H).  $^{13}\text{C}$  NMR (101 MHz,  $\text{CDCl}_3$ )  $\delta$  154.95 , 136.02 , 131.55 (q,  $J$  = 31.9 Hz), 131.23 , 129.65 , 125.91 (q,  $J$  = 3.7 Hz), 123.68 (q,  $J$  = 272.4 Hz), 20.70 , 12.52 .  $^{19}\text{F}$  NMR (376 MHz,  $\text{CDCl}_3$ )  $\delta$  -62.97.

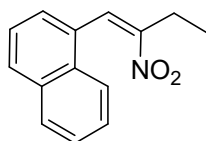

1-(2-nitrobut-1-en-1-yl)naphthalene was synthesized following the general procedure, 1-naphthaldehyde (1.56 g, 10 mmol) and nitroalkane (0.89 g, 10 mmol), was used to give 1-(2-nitrobut-1-en-1-yl)naphthalene (1.31 g, 57 %). white solid. The spectra are in accordance with those of the compound reported in the literature (European

Journal of Organic Chemistry, 2020, vol. 2020, # 26, p. 4059 – 4066).  $^1\text{H}$  NMR (400 MHz,  $\text{CDCl}_3$ )  $\delta$  8.49 (s, 1H), 7.92 – 7.82 (m, 3H), 7.57 – 7.46 (m, 3H), 7.39 (d,  $J = 7.1$  Hz, 1H), 2.72 (q,  $J = 7.4$  Hz, 2H), 1.18 (t,  $J = 7.4$  Hz, 3H).  $^{13}\text{C}$  NMR (101 MHz,  $\text{CDCl}_3$ )  $\delta$  154.94, 133.51, 131.53, 131.48, 130.17, 129.90, 128.81, 127.12, 126.69, 126.49, 125.29, 124.21, 20.96, 12.87.

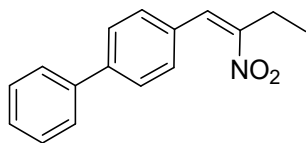

4-(2-nitrobut-1-en-1-yl)-1,1'-biphenyl was synthesized following the general procedure, [1,1'-biphenyl]-4-carbaldehyde (1.82 g, 10 mmol) and nitroalkane (0.89 g, 10 mmol), was used to give 4-(2-nitrobut-1-en-1-yl)-1,1'-biphenyl (1.09 g, 43 %). white solid. The spectra are in accordance with those of the compound reported in the literature (Tetrahedron Letters, 2013, vol. 54, # 24, p. 3194 – 3198).  $^1\text{H}$  NMR (400 MHz,  $\text{CDCl}_3$ )  $\delta$  8.05 (s, 1H), 7.68 (d,  $J = 8.2$  Hz, 2H), 7.62 (d,  $J = 7.5$  Hz, 2H), 7.48 (dd,  $J = 15.5, 8.0$  Hz, 4H), 7.39 (t,  $J = 7.3$  Hz, 1H), 2.92 (q,  $J = 7.4$  Hz, 2H), 1.31 (t,  $J = 7.4$  Hz, 3H).  $^{13}\text{C}$  NMR (101 MHz,  $\text{CDCl}_3$ )  $\delta$  153.14, 142.87, 139.85, 132.87, 131.23, 130.35, 129.03, 128.12, 127.64, 127.11, 20.91, 12.54.

Other (2-nitroalk-1-en-1-yl)benzene were commercial available from Jiangsu YUNPU New Pharmaceutical Material Technology Co., Ltd.

### 3. Physical data

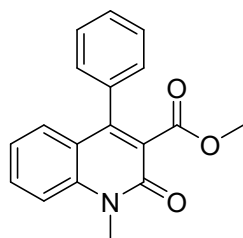

**3a**

methyl 1-methyl-2-oxo-4-phenyl-1,2-dihydroquinoline-3-carboxylate

Pale yellow solid, prepared according to the general procedure from 2-(methyl(phenyl)amino)-2-oxoacetic acid (65 mg, 0.36 mmol) and methyl cinnamate (49 mg, 0.3 mmol), 12 h, 65 mg, 74 % yield.

$^1\text{H}$  NMR (400 MHz, Chloroform-*d*)  $\delta$  7.55 (ddd,  $J = 8.7, 7.2, 1.6$  Hz, 1H), 7.44 – 7.35 (m, 4H), 7.31 – 7.24 (m, 3H), 7.09 (ddd,  $J = 8.2, 7.1, 1.1$  Hz, 1H), 3.73 (s, 3H), 3.53 (s, 3H).

$^{13}\text{C}$  NMR (101 MHz, Chloroform-*d*)  $\delta$  166.24, 159.04, 148.20, 139.91, 134.42, 131.67, 128.90, 128.81, 128.41, 126.45, 122.41, 120.23, 114.39, 52.27, 29.71.

HRMS (ESI): calcd for  $\text{C}_{18}\text{H}_{16}\text{NO}_3^+$   $[\text{M}+\text{H}]^+$ : 294.1125; found: 294.1131.

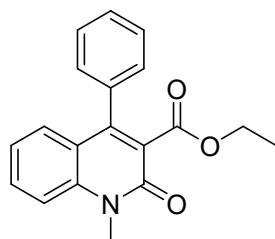

**3b**

ethyl 1-methyl-2-oxo-4-phenyl-1,2-dihydroquinoline-3-carboxylate

Pale yellow solid, prepared according to the general procedure from 2-(methyl(phenyl)amino)-2-oxoacetic acid (65 mg, 0.36 mmol) and ethyl cinnamate (53 mg, 0.3 mmol), 12 h, 74.6 mg, 81 % yield. (the spectra of **3b** are in accordance with those of the compound reported in the literature Adv. Synth. Catal. 2013, 355, 2044 and Org. Lett. 2021, 23, 3593-3598)

$^1\text{H}$  NMR (400 MHz,  $\text{CDCl}_3$ )  $\delta$  7.56 – 7.51 (m, 1H), 7.42 – 7.34 (m, 4H), 7.31 – 7.24 (m, 3H), 7.08 (t,  $J = 7.6$  Hz, 1H), 4.01 (q,  $J = 7.1$  Hz, 2H), 3.73 (s, 3H), 0.90 (t,  $J = 7.1$  Hz, 3H).

$^{13}\text{C}$  NMR (101 MHz,  $\text{CDCl}_3$ )  $\delta$  165.62, 159.04, 147.96, 139.88, 134.47, 131.58, 129.05 – 128.64 (m), 128.35, 122.37, 120.31, 114.36, 61.31, 29.73, 13.75.

HRMS (ESI): calcd for  $\text{C}_{19}\text{H}_{18}\text{NO}_3^+$   $[\text{M}+\text{H}]^+$ : 308.1281; found: 308.1288.

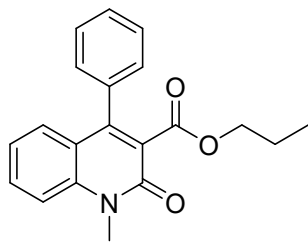

**3c**

propyl 1-methyl-2-oxo-4-phenyl-1,2-dihydroquinoline-3-carboxylate

Pale yellow solid, prepared according to the general procedure from 2-(methyl(phenyl)amino)-2-oxoacetic acid (65 mg, 0.36 mmol) and propyl cinnamate (57 mg, 0.3 mmol), 12 h, 75 mg, 78 % yield.

<sup>1</sup>H NMR (400 MHz, Chloroform-*d*)  $\delta$  7.54 (ddd, *J* = 8.6, 7.1, 1.6 Hz, 1H), 7.42 – 7.34 (m, 4H), 7.32 – 7.25 (m, 3H), 7.08 (ddd, *J* = 8.2, 7.0, 1.1 Hz, 1H), 3.91 (t, *J* = 6.7 Hz, 2H), 3.73 (s, 3H), 1.32 (h, *J* = 7.1 Hz, 2H), 0.66 (t, *J* = 7.4 Hz, 3H).

<sup>13</sup>C NMR (101 MHz, Chloroform-*d*)  $\delta$  165.82, 159.06, 147.78, 139.89, 134.50, 131.56, 128.97, 128.92, 128.87, 128.76, 128.39, 122.36, 120.31, 114.35, 67.02, 29.72, 21.64, 10.28.

HRMS (ESI): calcd for C<sub>20</sub>H<sub>20</sub>NO<sub>3</sub><sup>+</sup> [M+H]<sup>+</sup>: 322.1438; found: 322.1449.

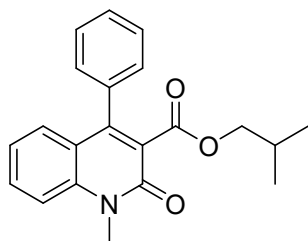

**3d**

isobutyl 1-methyl-2-oxo-4-phenyl-1,2-dihydroquinoline-3-carboxylate

Pale yellow solid, prepared according to the general procedure from 2-(methyl(phenyl)amino)-2-oxoacetic acid (65 mg, 0.36 mmol) and isobutyl cinnamate (61 mg, 0.3 mmol), 12 h, 77 mg, 77 % yield.

<sup>1</sup>H NMR (400 MHz, Chloroform-*d*)  $\delta$  7.53 (ddd, *J* = 8.6, 7.1, 1.6 Hz, 1H), 7.40 – 7.34 (m, 4H), 7.32 – 7.24 (m, 3H), 7.08 (ddd, *J* = 8.1, 7.1, 1.1 Hz, 1H), 3.77 – 3.67 (m, 5H), 1.61 (dq, *J* = 13.4, 6.7 Hz, 1H), 0.66 (d, *J* = 6.7 Hz, 6H).

<sup>13</sup>C NMR (101 MHz, Chloroform-*d*)  $\delta$  165.87, 159.06, 147.62, 139.87, 134.47, 131.53, 128.97, 128.87, 128.74, 128.42, 126.82, 122.34, 120.28, 114.34, 71.57, 29.71, 27.45, 18.94.

HRMS (ESI): calcd for C<sub>21</sub>H<sub>22</sub>NO<sub>3</sub><sup>+</sup> [M+H]<sup>+</sup>: 336.1594; found: 336.1589.

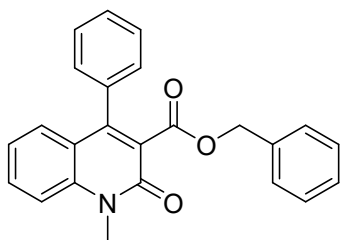

**3e**

benzyl 1-methyl-2-oxo-4-phenyl-1,2-dihydroquinoline-3-carboxylate

Pale yellow solid, prepared according to the general procedure from 2-(methyl(phenyl)amino)-2-oxoacetic acid (65 mg, 0.36 mmol) and benzyl cinnamate (72 mg, 0.3 mmol), 12 h, 78.6 mg, 71 % yield.  $^1\text{H NMR}$  (400 MHz, Chloroform-*d*)  $\delta$  7.53 (ddd,  $J = 8.6, 7.1, 1.6$  Hz, 1H), 7.37 – 7.28 (m, 4H), 7.23 (ddd,  $J = 8.3, 5.4, 1.7$  Hz, 3H), 7.17 (dt,  $J = 4.7, 3.0$  Hz, 3H), 7.07 (ddd,  $J = 8.2, 7.0, 1.1$  Hz, 1H), 6.98 (dd,  $J = 6.6, 2.9$  Hz, 2H), 4.98 (s, 2H), 3.72 (s, 3H).

$^{13}\text{C NMR}$  (101 MHz, Chloroform-*d*)  $\delta$  165.59, 159.06, 148.16, 139.92, 135.27, 134.25, 131.69, 128.91, 128.79, 128.44, 128.40, 128.38, 128.07, 122.42, 120.26, 114.39, 67.21, 29.78.

HRMS (ESI): calcd for  $\text{C}_{24}\text{H}_{20}\text{NO}_3^+$   $[\text{M}+\text{H}]^+$ : 370.1438; found: 370.1449.

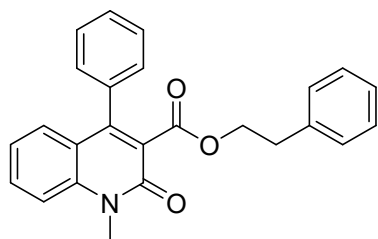

**3f**

phenethyl 1-methyl-2-oxo-4-phenyl-1,2-dihydroquinoline-3-carboxylate

Pale yellow solid, prepared according to the general procedure from 2-(methyl(phenyl)amino)-2-oxoacetic acid (65 mg, 0.36 mmol) and phenethyl cinnamate (76 mg, 0.3 mmol), 12 h, 86 mg, 75 % yield.

$^1\text{H NMR}$  (400 MHz, Chloroform-*d*)  $\delta$  7.53 (ddd,  $J = 8.7, 7.1, 1.6$  Hz, 1H), 7.39 – 7.29 (m, 4H), 7.25 (dd,  $J = 8.1, 1.5$  Hz, 1H), 7.19 (ddd,  $J = 12.6, 5.8, 3.8$  Hz, 4H), 7.14 – 7.10 (m, 1H), 7.08 (t,  $J = 7.6$  Hz, 1H), 7.05 – 7.00 (m, 2H), 4.14 (t,  $J = 7.4$  Hz, 2H), 3.73 (s, 3H), 2.59 (t,  $J = 7.3$  Hz, 2H).

$^{13}\text{C NMR}$  (101 MHz, Chloroform-*d*)  $\delta$  165.70, 159.04, 148.03, 139.91, 137.63, 134.38, 131.65, 128.90, 128.86, 128.77, 128.44, 128.40, 126.51, 126.46, 122.41, 120.25, 114.39, 65.83, 34.55, 29.74.

HRMS (ESI): calcd for  $\text{C}_{25}\text{H}_{22}\text{NO}_3^+$   $[\text{M}+\text{H}]^+$ : 384.1594; found: 384.1590.

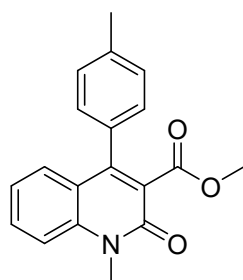

**3g**

methyl 1-methyl-2-oxo-4-(p-tolyl)-1,2-dihydroquinoline-3-carboxylate

Pale yellow solid, prepared according to the general procedure from 2-(methyl(phenyl)amino)-2-oxoacetic acid (65 mg, 0.36 mmol) and methyl 3-(p-tolyl)acrylate (53 mg, 0.3 mmol), 12 h, 56 mg, 61 % yield. (the spectra of **3g** are in accordance with those of the compound reported in the literature J. Med. Chem. 2004, 47, 2574)

$^1\text{H NMR}$  (400 MHz, Chloroform-*d*)  $\delta$  7.53 (ddd,  $J = 8.6, 7.1, 1.5$  Hz, 1H), 7.35 (dd,  $J = 8.5, 1.0$  Hz, 1H), 7.30 (dd,  $J = 8.0, 1.5$  Hz, 1H), 7.18 (q,  $J = 8.0$  Hz, 4H), 7.08 (ddd,  $J = 8.2, 7.1, 1.0$  Hz, 1H), 3.72 (s, 3H), 3.56 (s, 3H), 2.35 (s, 3H).

$^{13}\text{C}$  NMR (101 MHz, Chloroform-*d*)  $\delta$  166.42, 159.12, 148.36, 139.90, 138.82, 131.59, 131.41, 129.13, 128.87, 128.73, 126.43, 122.35, 120.42, 114.36, 52.30, 29.69, 21.38.

HRMS (ESI): calcd for  $\text{C}_{19}\text{H}_{18}\text{NO}_3^+$   $[\text{M}+\text{H}]^+$ : 308.1281; found: 308.1282.

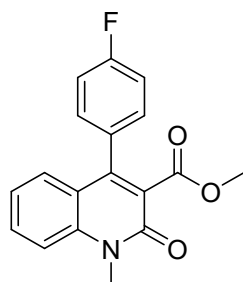

**3h**

methyl 4-(4-fluorophenyl)-1-methyl-2-oxo-1,2-dihydroquinoline-3-carboxylate

Pale yellow solid, prepared according to the general procedure from 2-(methyl(phenyl)amino)-2-oxoacetic acid (65 mg, 0.36 mmol) and methyl 3-(4-fluorophenyl)acrylate (54 mg, 0.3 mmol), 12 h, 80 mg, 86 % yield.

$^1\text{H}$  NMR (400 MHz, Chloroform-*d*)  $\delta$  7.55 (t,  $J = 7.9$  Hz, 1H), 7.37 (d,  $J = 8.5$  Hz, 1H), 7.30 – 7.19 (m, 3H), 7.15 – 7.06 (m, 3H), 3.72 (s, 3H), 3.56 (s, 3H).

$^{13}\text{C}$  NMR (101 MHz, Chloroform-*d*)  $\delta$  166.15, 163.00 (d,  $J = 249.1$  Hz), 158.93, 147.15, 139.91, 131.82, 130.80 (d,  $J = 8.5$  Hz), 130.30 (d,  $J = 3.6$  Hz), 128.54, 126.81, 122.53, 120.16, 115.66 (d,  $J = 21.8$  Hz), 114.50, 52.38, 29.75.

$^{19}\text{F}$  NMR (377 MHz, Chloroform-*d*)  $\delta$  -112.04.

HRMS (ESI): calcd for  $\text{C}_{18}\text{H}_{15}\text{FNO}_3^+$   $[\text{M}+\text{H}]^+$ : 312.1030; found: 312.1033.

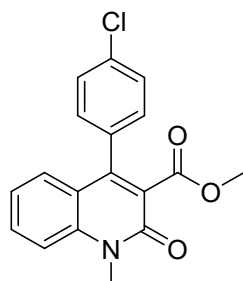

**3i**

methyl 4-(4-chlorophenyl)-1-methyl-2-oxo-1,2-dihydroquinoline-3-carboxylate

Pale yellow solid, prepared according to the general procedure from 2-(methyl(phenyl)amino)-2-oxoacetic acid (65 mg, 0.36 mmol) and methyl 3-(4-chlorophenyl)acrylate (59 mg, 0.3 mmol), 12 h, 80.6 mg, 82 % yield.

$^1\text{H}$  NMR (400 MHz, Chloroform-*d*)  $\delta$  7.64 (ddd,  $J = 8.7, 7.1, 1.6$  Hz, 1H), 7.50 – 7.43 (m, 3H), 7.33 – 7.27 (m, 3H), 7.19 (ddd,  $J = 8.1, 7.1, 1.1$  Hz, 1H), 3.81 (s, 3H), 3.66 (s, 3H).

$^{13}\text{C}$  NMR (101 MHz, Chloroform-*d*)  $\delta$  166.03, 158.87, 146.92, 139.91, 135.15, 132.79, 131.86, 130.27, 128.79, 128.48, 126.64, 122.55, 119.92, 114.52, 52.44, 29.76.

HRMS (ESI): calcd for  $\text{C}_{18}\text{H}_{15}\text{ClNO}_3^+$   $[\text{M}+\text{H}]^+$ : 328.0735; found: 328.0742.



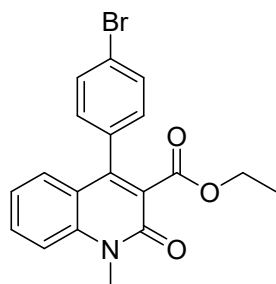

**3j**

ethyl 4-(4-bromophenyl)-1-methyl-2-oxo-1,2-dihydroquinoline-3-carboxylate

Pale yellow solid, prepared according to the general procedure from 2-(methyl(phenyl)amino)-2-oxoacetic acid (65 mg, 0.36 mmol) and ethyl 3-(4-bromophenyl)acrylate (53 mg, 0.3 mmol), 12 h, 71.8 mg, 62 % yield.

$^1\text{H}$  NMR (400 MHz, Chloroform-*d*)  $\delta$  7.60 – 7.50 (m, 3H), 7.36 (d,  $J$  = 8.5 Hz, 1H), 7.23 – 7.15 (m, 3H), 7.12 – 7.07 (m, 1H), 4.05 (q,  $J$  = 7.2 Hz, 2H), 3.72 (s, 3H), 0.97 (t,  $J$  = 7.1 Hz, 3H).

$^{13}\text{C}$  NMR (101 MHz, Chloroform-*d*)  $\delta$  165.43, 158.86, 146.66, 139.90, 133.35, 131.81, 131.66, 130.67, 128.42, 126.78, 123.28, 122.53, 119.90, 114.50, 61.50, 29.77, 13.84.

HRMS (ESI): calcd for  $\text{C}_{19}\text{H}_{17}\text{BrNO}_3^+$   $[\text{M}+\text{H}]^+$ : 386.0386; found: 386.0377.

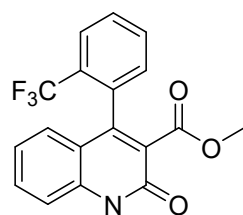

**3k**

methyl 1-methyl-2-oxo-4-(2-(trifluoromethyl)phenyl)-1,2-dihydroquinoline-3-carboxylate

Pale yellow solid, prepared according to the general procedure from 2-(methyl(phenyl)amino)-2-oxoacetic acid (65 mg, 0.36 mmol) and methyl 3-(2-(trifluoromethyl)phenyl)acrylate (69 mg, 0.3 mmol), 12 h, 41.1 mg, 38 % yield.

$^1\text{H}$  NMR (400 MHz, Chloroform-*d*)  $\delta$  7.37 (d,  $J$  = 8.5 Hz, 1H), 7.28 – 7.23 (m, 1H), 7.10 – 7.04 (m, 1H), 6.89 (dd,  $J$  = 8.1, 1.5 Hz, 1H), 3.74 (s, 3H), 3.51 (s, 3H).

$^{13}\text{C}$  NMR (101 MHz, Chloroform-*d*)  $\delta$  165.48, 158.75, 146.86, 139.58, 132.48, 131.90, 131.66, 130.95, 129.30, 129.06 (q,  $J$  = 30.8 Hz), 128.75, 126.69 (q,  $J$  = 4.5 Hz), 126.10, 123.59 (q,  $J$  = 274.4 Hz), 122.41, 120.32, 114.33, 52.17, 29.82.

$^{19}\text{F}$  NMR (376 MHz, Chloroform-*d*)  $\delta$  -58.90.

HRMS (ESI): calcd for  $\text{C}_{19}\text{H}_{15}\text{F}_3\text{NO}_3^+$   $[\text{M}+\text{H}]^+$ : 362.0999; found: 362.1003.

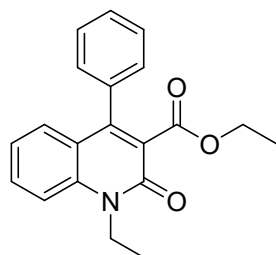

**3l**

ethyl 1-ethyl-2-oxo-4-phenyl-1,2-dihydroquinoline-3-carboxylate

Pale yellow solid, prepared according to the general procedure from 2-(ethyl(phenyl)amino)-2-oxoacetic acid (70mg, 0.36 mmol) and ethyl cinnamate (53 mg, 0.3 mmol), 11 h, 80 mg, 83 % yield.

$^1\text{H NMR}$  (400 MHz,  $\text{CDCl}_3$ )  $\delta$  7.58 – 7.49 (m, 1H), 7.42 – 7.35 (m, 4H), 7.31 – 7.25 (m, 3H), 7.07 (t,  $J = 7.6$  Hz, 1H), 4.37 (q,  $J = 7.1$  Hz, 2H), 4.01 (q,  $J = 7.1$  Hz, 2H), 1.36 (t,  $J = 7.1$  Hz, 3H), 0.90 (t,  $J = 7.1$  Hz, 3H).

$^{13}\text{C NMR}$  (101 MHz,  $\text{CDCl}_3$ )  $\delta$  165.69 , 158.52 , 147.85 , 138.89 , 134.56 , 131.49 , 128.86 (d,  $J = 15.5$  Hz), 128.33 , 126.67 , 122.10 , 120.54 , 114.20 , 61.29 , 37.73 , 13.74 , 12.66 .

HRMS (ESI): calcd for  $\text{C}_{20}\text{H}_{20}\text{NO}_3^+$   $[\text{M}+\text{H}]^+$ : 322.1438; found: 322.1432.

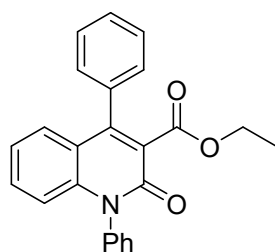

**3m**

ethyl 2-oxo-1,4-diphenyl-1,2-dihydroquinoline-3-carboxylate

Pale yellow solid, prepared according to the general procedure from 2-(diphenylamino)-2-oxoacetic acid (87 mg, 0.36 mmol) and ethyl cinnamate (53 mg, 0.3 mmol), 13 h, 60.9 mg, 55 % yield.

$^1\text{H NMR}$  (400 MHz, Chloroform-*d*)  $\delta$  7.54 (dd,  $J = 8.3, 6.7$  Hz, 2H), 7.49 – 7.40 (m, 4H), 7.37 (dd,  $J = 7.2, 2.5$  Hz, 2H), 7.32 – 7.26 (m, 4H), 7.04 (ddd,  $J = 8.2, 7.0, 1.1$  Hz, 1H), 6.68 (d,  $J = 8.4$  Hz, 1H), 4.01 (q,  $J = 7.1$  Hz, 2H), 0.93 (t,  $J = 7.1$  Hz, 3H).

$^{13}\text{C NMR}$  (101 MHz, Chloroform-*d*)  $\delta$  165.39, 158.94, 148.79, 141.01, 137.16, 134.50, 131.08, 130.19, 129.08, 128.95, 128.90, 128.43, 128.32, 127.10, 122.51, 120.06, 116.24, 61.38, 13.78.

HRMS (ESI): calcd for  $\text{C}_{24}\text{H}_{20}\text{NO}_3^+$   $[\text{M}+\text{H}]^+$ : 370.1438; found: 370.1441.

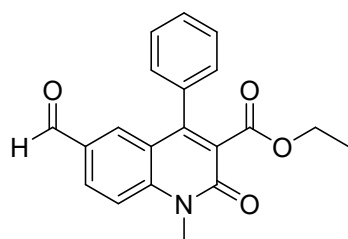

**3n**

ethyl 6-formyl-1-methyl-2-oxo-4-phenyl-1,2-dihydroquinoline-3-carboxylate

Pale yellow solid, prepared according to the general procedure from 2-((4-formylphenyl)(methyl)amino)-2-oxoacetic acid (75 mg, 0.36 mmol) and ethyl cinnamate (53 mg, 0.3 mmol), 11 h, 70.4 mg, 70 % yield.

$^1\text{H NMR}$  (400 MHz,  $\text{CDCl}_3$ )  $\delta$  9.81 (s, 1H), 8.06 (dd,  $J = 8.8, 1.9$  Hz, 1H), 7.75 (d,  $J = 1.8$  Hz, 1H), 7.50 (d,  $J = 8.8$  Hz, 1H), 7.47 – 7.42 (m, 3H), 7.33 – 7.27 (m, 2H), 4.03 (q,  $J = 7.1$  Hz, 2H), 3.77 (s, 3H), 0.91 (t,  $J = 7.1$  Hz, 3H).

$^{13}\text{C NMR}$  (101 MHz,  $\text{CDCl}_3$ )  $\delta$  190.39 , 164.98 , 159.05 , 147.95 , 143.77 , 133.52 , 132.25 , 130.94 , 130.69 , 129.39 , 128.77 (d,  $J = 14.9$  Hz), 127.61 , 120.29 , 115.25 , 61.56 , 30.19 , 13.72 .

HRMS (ESI): calcd for  $C_{20}H_{18}NO_4^+$   $[M+H]^+$ : 336.1230; found: 336.1237.

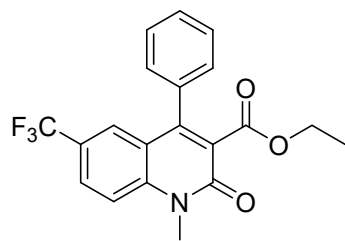

**3o**

ethyl 1-methyl-2-oxo-4-phenyl-6-(trifluoromethyl)-1,2-dihydroquinoline-3-carboxylate

Pale yellow solid, prepared according to the general procedure from 2-(methyl(4-(trifluoromethyl)phenyl)amino)-2-oxoacetic acid (89 mg, 0.36 mmol) and ethyl cinnamate (53 mg, 0.3 mmol), 12 h, 82 mg, 73 % yield.

$^1H$  NMR (400 MHz,  $CDCl_3$ )  $\delta$  7.76 (dd,  $J = 8.9, 1.8$  Hz, 1H), 7.52 (s, 1H), 7.46 (d,  $J = 9.0$  Hz, 1H), 7.45 – 7.39 (m, 3H), 7.30 – 7.26 (m, 2H), 4.02 (q,  $J = 7.1$  Hz, 2H), 3.75 (s, 3H), 0.91 (t,  $J = 7.1$  Hz, 3H).

$^{13}C$  NMR (101 MHz,  $CDCl_3$ )  $\delta$  165.02, 158.94, 147.56, 141.85, 133.41, 129.39, 128.82, 128.69, 127.98 – 127.83 (m), 125.98 (q,  $J = 4.2$  Hz), 124.68 (q,  $J = 33.5$  Hz), 123.74 (q,  $J = 271.8$  Hz), 120.11, 114.99, 61.56, 30.03, 13.73.

$^{19}F$  NMR (376 MHz,  $CDCl_3$ )  $\delta$  -61.97.

HRMS (ESI): calcd for  $C_{20}H_{17}F_3NO_3^+$   $[M+H]^+$ : 376.1155; found: 376.1148.

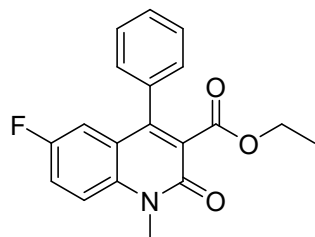

**3p**

ethyl 6-fluoro-1-methyl-2-oxo-4-phenyl-1,2-dihydroquinoline-3-carboxylate

Pale yellow solid, prepared according to the general procedure from 2-((4-fluorophenyl)(methyl)amino)-2-oxoacetic acid (71 mg, 0.36 mmol) and ethyl cinnamate (53 mg, 0.3 mmol), 12 h, 77 mg, 79 % yield.

$^1H$  NMR (400 MHz,  $CDCl_3$ )  $\delta$  7.45 – 7.38 (m, 3H), 7.34 (dd,  $J = 9.2, 4.6$  Hz, 1H), 7.30 – 7.24 (m, 3H), 6.94 (dd,  $J = 9.3, 2.8$  Hz, 1H), 4.02 (q,  $J = 7.1$  Hz, 2H), 3.73 (s, 3H), 0.90 (t,  $J = 7.1$  Hz, 3H).

$^{13}C$  NMR (101 MHz,  $CDCl_3$ )  $\delta$  158.71, 157.90 (d,  $J = 242.7$  Hz), 147.01 (d,  $J = 3.1$  Hz), 136.44, 133.90, 129.15, 128.81, 128.57, 127.78, 121.42 (d,  $J = 8.1$  Hz), 119.37 (d,  $J = 24.0$  Hz), 115.97 (d,  $J = 8.0$  Hz), 113.89 (d,  $J = 23.9$  Hz), 61.45, 30.00, 13.74.

$^{19}F$  NMR (377 MHz,  $CDCl_3$ )  $\delta$  -119.80.

HRMS (ESI): calcd for  $C_{19}H_{17}FNO_3^+$   $[M+H]^+$ : 326.1187; found: 326.1190.

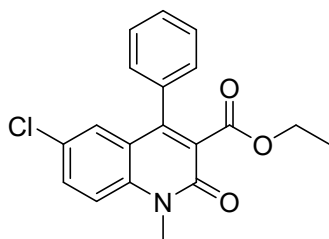

**3q**

ethyl 6-chloro-1-methyl-2-oxo-4-phenyl-1,2-dihydroquinoline-3-carboxylate

Pale yellow solid, prepared according to the general procedure from 2-((4-chlorophenyl)(methyl)amino)-2-oxoacetic acid (77 mg, 0.36 mmol) and ethyl cinnamate (53 mg, 0.3 mmol), 12 h, 76.7 mg, 75 % yield. (the spectra of **3q** are in accordance with those of the compound reported in the literature Adv. Synth. Catal. 2013, 355, 2044)

$^1\text{H NMR}$  (400 MHz,  $\text{CDCl}_3$ )  $\delta$  7.48 (dd,  $J = 9.0, 2.4$  Hz, 1H), 7.44 – 7.39 (m, 3H), 7.28 (ddd,  $J = 9.2, 6.3, 5.9$  Hz, 3H), 7.22 – 7.17 (m, 1H), 4.01 (q,  $J = 7.1$  Hz, 2H), 3.71 (s, 3H), 0.90 (t,  $J = 7.1$  Hz, 3H).

$^{13}\text{C NMR}$  (101 MHz,  $\text{CDCl}_3$ )  $\delta$  165.21 , 158.70 , 146.89 , 138.41 , 133.71 , 131.59 , 129.19 , 128.85 , 128.59 , 128.12 , 127.75 (d,  $J = 6.5$  Hz), 121.49 , 115.86 , 61.47 , 29.92 , 13.73 .

HRMS (ESI): calcd for  $\text{C}_{19}\text{H}_{17}\text{ClNO}_3^+$   $[\text{M}+\text{H}]^+$ : 342.0891; found: 342.0890.

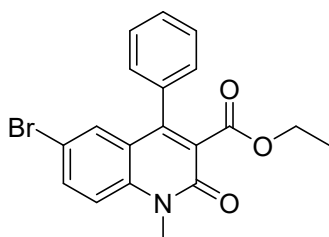

**3r**

ethyl 6-bromo-1-methyl-2-oxo-4-phenyl-1,2-dihydroquinoline-3-carboxylate

Pale yellow solid, prepared according to the general procedure from 2-((4-bromophenyl)(methyl)amino)-2-oxoacetic acid (93 mg, 0.36 mmol) and ethyl cinnamate (53 mg, 0.3 mmol), 12 h, 77.6 mg, 67 % yield.

$^1\text{H NMR}$  (400 MHz,  $\text{CDCl}_3$ )  $\delta$  7.61 (dd,  $J = 9.0, 2.3$  Hz, 1H), 7.41 (dd,  $J = 6.5, 3.5$  Hz, 3H), 7.35 (d,  $J = 2.2$  Hz, 1H), 7.29 – 7.22 (m, 3H), 4.01 (q,  $J = 7.1$  Hz, 2H), 3.70 (s, 3H), 0.90 (t,  $J = 7.1$  Hz, 3H).

$^{13}\text{C NMR}$  (101 MHz,  $\text{CDCl}_3$ )  $\delta$  165.18 , 158.68 , 146.83 , 138.82 , 134.35 , 133.67 , 130.79 , 129.20 , 128.85 , 128.60 , 127.69 , 121.92 , 116.13 , 115.52 , 61.47 , 29.88 , 13.73 .

HRMS (ESI): calcd for  $\text{C}_{19}\text{H}_{17}\text{BrNO}_3^+$   $[\text{M}+\text{H}]^+$ : 386.0386; found: 386.0389.

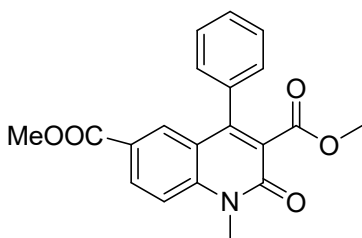

**3s**

dimethyl 1-methyl-2-oxo-4-phenyl-1,2-dihydroquinoline-3,6-dicarboxylate

Pale yellow solid, prepared according to the general procedure from 2-((4-(methoxycarbonyl)phenyl)(methyl)amino)-2-oxoacetic acid (85 mg, 0.36 mmol) and ethyl cinnamate (49

mg, 0.3 mmol), 12 h, 81.1 mg, 77 % yield.

$^1\text{H}$  NMR (400 MHz,  $\text{CDCl}_3$ )  $\delta$  8.17 (dd,  $J = 8.9, 1.9$  Hz, 1H), 7.97 (d,  $J = 1.9$  Hz, 1H), 7.45 – 7.39 (m, 4H), 7.28 (dd,  $J = 6.6, 3.0$  Hz, 2H), 3.77 (s, 3H), 3.74 (s, 3H), 3.54 (s, 3H).

$^{13}\text{C}$  NMR (101 MHz,  $\text{CDCl}_3$ )  $\delta$  165.92 (d,  $J = 18.6$  Hz), 159.07, 148.35, 142.78, 133.70, 132.29, 130.78, 129.31, 128.70 (d,  $J = 8.7$  Hz), 127.16, 124.31, 119.84, 114.53, 52.35 (d,  $J = 9.5$  Hz), 30.05.

HRMS (ESI): calcd for  $\text{C}_{20}\text{H}_{18}\text{NO}_5^+$   $[\text{M}+\text{H}]^+$ : 352.1179; found: 352.1190.

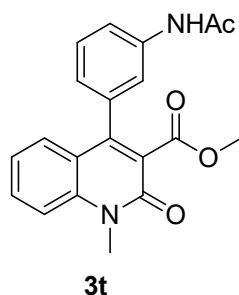

methyl 4-(3-acetamidophenyl)-1-methyl-2-oxo-1,2-dihydroquinoline-3-carboxylate

Pale yellow solid, prepared according to the general procedure from 2-(methyl(phenyl)amino)-2-oxoacetic acid (65 mg, 0.36 mmol) and methyl 3-(3-acetamidophenyl)acrylate (66 mg, 0.3 mmol), 12 h, 45.3 mg, 43 % yield.

$^1\text{H}$  NMR (400 MHz,  $\text{CDCl}_3$ )  $\delta$  7.78 (s, 1H), 7.74 (d,  $J = 8.1$  Hz, 1H), 7.52 (t,  $J = 7.8$  Hz, 1H), 7.33 (d,  $J = 7.5$  Hz, 2H), 7.31 – 7.25 (m, 2H), 7.08 (t,  $J = 7.6$  Hz, 1H), 6.97 (d,  $J = 7.4$  Hz, 1H), 3.70 (s, 3H), 3.52 (s, 3H), 2.10 (s, 3H).

$^{13}\text{C}$  NMR (101 MHz,  $\text{CDCl}_3$ )  $\delta$  168.79, 166.31, 159.05, 147.84, 139.77, 138.35, 134.89, 131.78, 129.20, 128.81, 126.19, 124.35, 122.56, 120.33, 119.92 (d,  $J = 17.6$  Hz), 114.41, 52.40, 29.78, 24.57.

HRMS (ESI): calcd for  $\text{C}_{20}\text{H}_{19}\text{N}_2\text{O}_4^+$   $[\text{M}+\text{H}]^+$ : 351.1345; found: 352.1363.

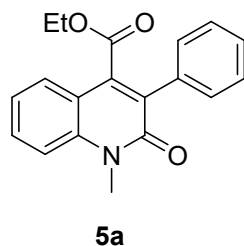

ethyl 1-methyl-2-oxo-3-phenyl-1,2-dihydroquinoline-4-carboxylate

Pale yellow solid, prepared according to the general procedure from 2-(methyl(phenyl)amino)-2-oxoacetic acid (65 mg, 0.36 mmol) and ethyl 2-nitro-3-phenylacrylate (67 mg, 0.3 mmol), 12 h, 62.1 mg, 56 % yield.

$^1\text{H}$  NMR (400 MHz, Chloroform-*d*)  $\delta$  7.65 – 7.58 (m, 2H), 7.45 – 7.36 (m, 6H), 7.29 (d,  $J = 7.6$  Hz, 1H), 4.13 (q,  $J = 7.1$  Hz, 2H), 3.80 (s, 3H), 0.95 (t,  $J = 7.1$  Hz, 3H).

$^{13}\text{C}$  NMR (101 MHz, Chloroform-*d*)  $\delta$  166.50, 161.29, 140.27, 139.66, 134.80, 130.97, 129.54, 128.38, 128.04, 126.50, 122.68, 117.23, 114.48, 61.78, 30.28, 13.61.

HRMS (ESI): calcd for  $\text{C}_{19}\text{H}_{18}\text{NO}_3^+$   $[\text{M}+\text{H}]^+$ : 308.1281; found: 308.1275.

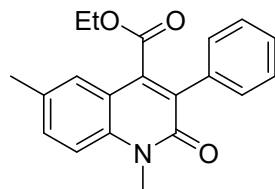

**5b**

ethyl 1,6-dimethyl-2-oxo-3-phenyl-1,2-dihydroquinoline-4-carboxylate

yellow solid, prepared according to the general procedure from 2-(methyl(*p*-tolyl)amino)-2-oxoacetic acid (70 mg, 0.36 mmol) and ethyl 2-nitro-3-phenylacrylate (67 mg, 0.3 mmol), 10 h, 48.1 mg, 50 % yield.

$^1\text{H}$  NMR (400 MHz,  $\text{CDCl}_3$ )  $\delta$  7.45 – 7.30 (m, 8H), 4.13 (q,  $J = 7.1$  Hz, 2H), 3.78 (s, 3H), 2.43 (s, 3H), 0.94 (t,  $J = 7.1$  Hz, 3H).

$^{13}\text{C}$  NMR (101 MHz,  $\text{CDCl}_3$ )  $\delta$  166.63, 161.12, 140.03, 137.72, 134.94, 132.27 (d,  $J = 4.8$  Hz), 130.61, 129.56, 128.28, 128.00, 126.12, 117.09, 114.39, 61.73, 30.26, 20.80, 13.59.

HRMS (ESI): calcd for  $\text{C}_{20}\text{H}_{20}\text{NO}_3^+$   $[\text{M}+\text{H}]^+$ : 322.1438; found: 322.1431.

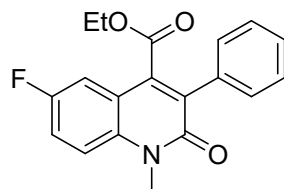

**5c**

ethyl 6-fluoro-1-methyl-2-oxo-3-phenyl-1,2-dihydroquinoline-4-carboxylate

Pale yellow solid, prepared according to the general procedure from 2-((4-fluorophenyl)(methyl)amino)-2-oxoacetic acid (71 mg, 0.36 mmol) and ethyl 2-nitro-3-phenylacrylate (67 mg, 0.3 mmol), 10 h, 42.9 mg, 44 % yield.

$^1\text{H}$  NMR (400 MHz, Chloroform-*d*)  $\delta$  7.40 (d,  $J = 4.5$  Hz, 5H), 7.37 (d,  $J = 3.4$  Hz, 1H), 7.36 – 7.30 (m, 2H), 4.12 (q,  $J = 7.1$  Hz, 2H), 3.79 (s, 3H), 0.94 (t,  $J = 7.1$  Hz, 3H).

$^{13}\text{C}$  NMR (101 MHz, Chloroform-*d*)  $\delta$  166.12, 160.89, 158.02 (d,  $J = 242.8$  Hz), 139.26 (d,  $J = 3.6$  Hz), 136.25, 134.63, 132.21, 129.42, 128.58, 128.09, 118.77 (d,  $J = 23.6$  Hz), 118.09 (d,  $J = 8.7$  Hz), 116.04 (d,  $J = 8.1$  Hz), 111.92 (d,  $J = 24.0$  Hz), 61.97, 30.55, 13.55.

$^{19}\text{F}$  NMR (376 MHz, Chloroform-*d*)  $\delta$  -119.71.

HRMS (ESI): calcd for  $\text{C}_{19}\text{H}_{17}\text{FNO}_3^+$   $[\text{M}+\text{H}]^+$ : 326.1187; found: 326.1191.

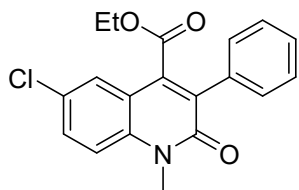

**5d**

ethyl 6-chloro-1-methyl-2-oxo-3-phenyl-1,2-dihydroquinoline-4-carboxylate

Pale yellow solid, prepared according to the general procedure from 2-((4-chlorophenyl)(methyl)amino)-2-oxoacetic acid (77 mg, 0.36 mmol) and ethyl 2-nitro-3-phenylacrylate (67 mg, 0.3 mmol), 10 h, 44 mg, 43 % yield.

$^1\text{H NMR}$  (400 MHz,  $\text{CDCl}_3$ )  $\delta$  7.59 (d,  $J = 2.2$  Hz, 1H), 7.56 (dd,  $J = 8.9, 2.3$  Hz, 1H), 7.42 – 7.38 (m, 5H), 7.36 (d,  $J = 9.0$  Hz, 1H), 4.13 (q,  $J = 7.1$  Hz, 2H), 3.78 (s, 3H), 0.93 (t,  $J = 7.1$  Hz, 3H).

$^{13}\text{C NMR}$  (101 MHz,  $\text{CDCl}_3$ )  $\delta$  166.00, 160.92, 139.08, 138.18, 134.50, 132.09, 130.95, 129.42, 128.61, 128.18 (d,  $J = 16.7$  Hz), 125.79, 118.27, 115.85, 62.02, 30.46, 13.54.

HRMS (ESI): calcd for  $\text{C}_{19}\text{H}_{17}\text{ClNO}_3^+$   $[\text{M}+\text{H}]^+$ : 342.0891; found: 342.0900.

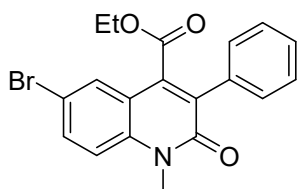

**5e**

ethyl 6-bromo-1-methyl-2-oxo-3-phenyl-1,2-dihydroquinoline-4-carboxylate

Pale yellow solid, prepared according to the general procedure from 2-((4-bromophenyl)(methyl)amino)-2-oxoacetic acid (93 mg, 0.36 mmol) and ethyl 2-nitro-3-phenylacrylate (67 mg, 0.3 mmol), 10 h, 42.7 mg, 37 % yield.

$^1\text{H NMR}$  (400 MHz,  $\text{CDCl}_3$ )  $\delta$  7.73 (d,  $J = 2.1$  Hz, 1H), 7.69 (dd,  $J = 9.0, 2.1$  Hz, 1H), 7.40 (s, 5H), 7.30 (d,  $J = 9.0$  Hz, 1H), 4.13 (q,  $J = 7.1$  Hz, 2H), 3.77 (s, 3H), 0.93 (t,  $J = 7.1$  Hz, 3H).

$^{13}\text{C NMR}$  (101 MHz,  $\text{CDCl}_3$ )  $\delta$  165.97, 160.90, 139.01, 138.58, 134.47, 133.70, 132.02, 129.42, 128.70 (d,  $J = 17.4$  Hz), 128.09, 121.03, 118.72, 116.10, 115.61, 62.03, 30.42, 13.53.

HRMS (ESI): calcd for  $\text{C}_{19}\text{H}_{17}\text{BrNO}_3^+$   $[\text{M}+\text{H}]^+$ : 386.0386; found: 386.0379.

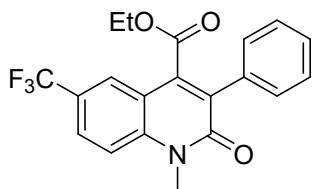

**5f**

1-methyl-3-phenyl-4-propionyl-6-(trifluoromethyl)quinolin-2(1H)-one

Pale yellow solid, prepared according to the general procedure from 2-(methyl(4-(trifluoromethyl)phenyl)amino)-2-oxoacetic acid (89 mg, 0.36 mmol) and ethyl 2-nitro-3-phenylacrylate

(67 mg, 0.3 mmol), 11 h, 69.7 mg, 62 % yield.

$^1\text{H NMR}$  (400 MHz,  $\text{CDCl}_3$ )  $\delta$  7.87 (s, 1H), 7.83 (d,  $J = 8.9$  Hz, 1H), 7.52 (d,  $J = 9.0$  Hz, 1H), 7.41 (s, 5H), 4.15 (q,  $J = 7.1$  Hz, 2H), 3.82 (s, 3H), 0.95 (t,  $J = 7.1$  Hz, 3H).

$^{13}\text{C NMR}$  (101 MHz,  $\text{CDCl}_3$ )  $\delta$  165.81, 161.19, 141.57, 139.67, 134.26, 132.34, 129.38, 128.75, 128.16, 127.25 (d,  $J = 3.4$  Hz), 124.88 (d,  $J = 33.6$  Hz), 123.97 (d,  $J = 4.1$  Hz), 123.80 (d,  $J = 271.7$  Hz), 116.94, 115.01, 62.14, 30.57, 13.53.

$^{19}\text{F NMR}$  (376 MHz,  $\text{CDCl}_3$ )  $\delta$  -61.94.

HRMS (ESI): calcd for  $\text{C}_{20}\text{H}_{17}\text{F}_3\text{NO}_3^+$   $[\text{M}+\text{H}]^+$ : 376.1155; found: 376.156.

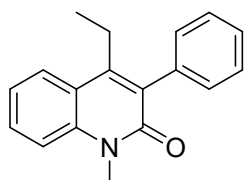

**5g**

4-ethyl-1-methyl-3-phenylquinolin-2(1H)-one

Pale yellow solid, prepared according to the general procedure from 2-(methyl(phenyl)amino)-2-oxoacetic acid (65 mg, 0.36 mmol) and (2-nitrobut-1-en-1-yl)benzene (53 mg, 0.3 mmol), 12 h, 56.8 mg, 72 % yield. (the spectra of **5g** are in accordance with those of the compound reported in the literature Org.Lett.2020, 22, 2230–2234)

$^1\text{H NMR}$  (400 MHz, Chloroform-*d*)  $\delta$  7.76 (dd,  $J = 8.1, 1.5$  Hz, 1H), 7.51 (ddd,  $J = 8.5, 7.1, 1.4$  Hz, 1H), 7.42 – 7.33 (m, 3H), 7.33 – 7.27 (m, 1H), 7.24 – 7.20 (m, 1H), 7.20 – 7.16 (m, 2H), 3.69 (s, 3H), 2.64 (q,  $J = 7.5$  Hz, 2H), 1.10 (t,  $J = 7.5$  Hz, 3H).

$^{13}\text{C NMR}$  (101 MHz, Chloroform-*d*)  $\delta$  161.98, 148.20, 139.74, 136.94, 132.10, 130.06, 129.54, 128.39, 127.44, 125.75, 122.01, 120.17, 114.57, 29.87, 23.04, 14.64.

HRMS (ESI): calcd for  $\text{C}_{18}\text{H}_{18}\text{NO}^+$   $[\text{M}+\text{H}]^+$ : 264.1383; found: 264.1391.

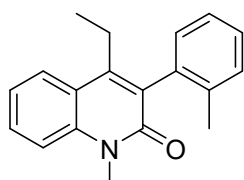

**5h**

4-ethyl-1-methyl-3-(o-tolyl)quinolin-2(1H)-one

Pale yellow solid, prepared according to the general procedure from 2-(methyl(phenyl)amino)-2-oxoacetic acid (65 mg, 0.36 mmol) and 1-methyl-2-(2-nitrobut-1-en-1-yl)benzene (57 mg, 0.3 mmol), 12 h, 54.8 mg, 66 % yield.

$^1\text{H NMR}$  (400 MHz, Chloroform-*d*)  $\delta$  7.83 (dd,  $J = 8.1, 1.5$  Hz, 1H), 7.59 (ddd,  $J = 8.6, 7.1, 1.4$  Hz, 1H), 7.44 (dd,  $J = 8.6, 1.1$  Hz, 1H), 7.32 – 7.23 (m, 5H), 7.12 – 7.06 (m, 1H), 3.77 (s, 3H), 2.77 (dq,  $J = 13.1, 7.6$  Hz, 1H), 2.51 (dq,  $J = 13.2, 7.6$  Hz, 1H), 2.13 (s, 3H), 1.12 (t,  $J = 7.6$  Hz, 3H).

$^{13}\text{C NMR}$  (101 MHz, Chloroform-*d*)  $\delta$  161.33, 148.29, 139.83, 136.57, 136.45, 131.72, 130.10, 129.99, 129.44, 127.77, 125.87, 125.67, 121.94, 120.13, 114.58, 29.85, 22.96, 19.72, 13.96.

HRMS (ESI): calcd for  $\text{C}_{19}\text{H}_{20}\text{NO}^+$   $[\text{M}+\text{H}]^+$ : 278.1539; found: 278.1539.



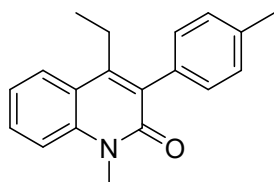

**5i**

4-ethyl-1-methyl-3-(p-tolyl)quinolin-2(1H)-one

Pale yellow solid, prepared according to the general procedure from 2-(methyl(phenyl)amino)-2-oxoacetic acid (65 mg, 0.36 mmol) and 1-methyl-4-(2-nitrobut-1-en-1-yl)benzene (57 mg, 0.3 mmol), 12 h, 64.8 mg, 78 % yield.

<sup>1</sup>H NMR (400 MHz, CDCl<sub>3</sub>) δ 7.82 (d, *J* = 8.1 Hz, 1H), 7.57 (t, *J* = 7.8 Hz, 1H), 7.41 (d, *J* = 8.5 Hz, 1H), 7.27 (dd, *J* = 15.5, 6.5 Hz, 3H), 7.14 (d, *J* = 7.8 Hz, 2H), 3.75 (s, 3H), 2.73 (q, *J* = 7.5 Hz, 2H), 2.40 (s, 3H), 1.17 (t, *J* = 7.5 Hz, 3H).

<sup>13</sup>C NMR (101 MHz, CDCl<sub>3</sub>) δ 162.08, 148.09, 139.68, 137.00, 133.89, 132.08, 129.92, 129.35, 129.11, 125.69, 121.93, 120.19, 114.52, 29.87, 23.05, 21.35, 14.67.

HRMS (ESI): calcd for C<sub>19</sub>H<sub>20</sub>NO<sup>+</sup> [M+H]<sup>+</sup>: 278.1539; found: 278.1533.

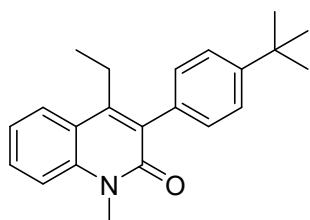

**5j**

3-(4-(tert-butyl)phenyl)-4-ethyl-1-methylquinolin-2(1H)-one

Pale yellow solid, prepared according to the general procedure from 2-(methyl(phenyl)amino)-2-oxoacetic acid (65 mg, 0.36 mmol) and (Z)-1-(tert-butyl)-4-(2-nitrobut-1-en-1-yl)benzene (70 mg, 0.3 mmol), 12 h, 77.5 mg, 81 % yield.

<sup>1</sup>H NMR (400 MHz, Chloroform-*d*) δ 7.83 (dd, *J* = 8.1, 1.5 Hz, 1H), 7.57 (ddd, *J* = 8.5, 7.1, 1.5 Hz, 1H), 7.47 – 7.43 (m, 2H), 7.42 (dd, *J* = 8.5, 1.2 Hz, 1H), 7.31 – 7.27 (m, 1H), 7.20 – 7.16 (m, 2H), 3.75 (s, 3H), 2.74 (q, *J* = 7.5 Hz, 2H), 1.36 (s, 9H), 1.19 (t, *J* = 7.5 Hz, 3H).

<sup>13</sup>C NMR (101 MHz, Chloroform-*d*) δ 162.09, 149.98, 148.10, 139.67, 133.75, 132.08, 129.89, 129.10, 125.72, 125.25, 121.90, 120.24, 114.50, 34.59, 31.41, 29.84, 23.07, 14.78.

HRMS (ESI): calcd for C<sub>22</sub>H<sub>26</sub>NO<sup>+</sup> [M+H]<sup>+</sup>: 320.2009; found: 320.2014.

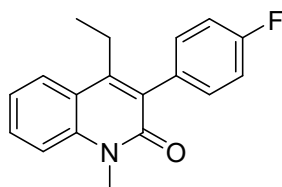

**5k**

4-ethyl-3-(4-fluorophenyl)-1-methylquinolin-2(1H)-one

Pale yellow solid, prepared according to the general procedure from 2-(methyl(phenyl)amino)-2-

oxoacetic acid (65 mg, 0.36 mmol) and 1-fluoro-4-(2-nitrobut-1-en-1-yl)benzene (59 mg, 0.3 mmol), 12 h, 64.9 mg, 77 % yield.

$^1\text{H}$  NMR (400 MHz,  $\text{CDCl}_3$ )  $\delta$  7.83 (d,  $J = 8.0$  Hz, 1H), 7.59 (t,  $J = 7.8$  Hz, 1H), 7.43 (d,  $J = 8.5$  Hz, 1H), 7.31 (d,  $J = 7.6$  Hz, 1H), 7.24 (dt,  $J = 8.3, 6.6$  Hz, 2H), 7.14 (t,  $J = 8.7$  Hz, 2H), 3.76 (s, 3H), 2.72 (q,  $J = 7.5$  Hz, 2H), 1.17 (t,  $J = 7.6$  Hz, 3H).

$^{13}\text{C}$  NMR (101 MHz,  $\text{CDCl}_3$ )  $\delta$  162.23 (d,  $J = 245.8$  Hz), 161.90, 148.59, 139.71, 132.72 (d,  $J = 3.4$  Hz), 131.28 (d,  $J = 8.0$  Hz), 131.01, 130.21, 125.75, 122.08, 120.02, 115.39 (d,  $J = 21.3$  Hz), 114.60, 29.89, 23.02, 14.57.

$^{19}\text{F}$  NMR (376 MHz, Chloroform-*d*)  $\delta$  -115.07.

HRMS (ESI): calcd for  $\text{C}_{18}\text{H}_{17}\text{FNO}^+$   $[\text{M}+\text{H}]^+$ : 282.1289; found: 282.1286.

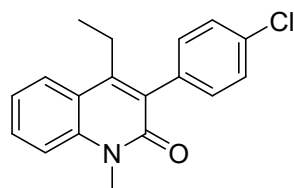

**5l**

### 3-(4-chlorophenyl)-4-ethyl-1-methylquinolin-2(1H)-one

Pale yellow solid, prepared according to the general procedure from 2-(methyl(phenyl)amino)-2-oxoacetic acid (65 mg, 0.36 mmol) and 1-chloro-4-(2-nitrobut-1-en-1-yl)benzene (64 mg, 0.3 mmol), 12 h, 64.2 mg, 72 % yield.

$^1\text{H}$  NMR (400 MHz,  $\text{CDCl}_3$ )  $\delta$  7.83 (d,  $J = 8.0$  Hz, 1H), 7.59 (dd,  $J = 10.9, 8.3$  Hz, 3H), 7.43 (d,  $J = 8.5$  Hz, 1H), 7.30 (t,  $J = 7.6$  Hz, 1H), 7.14 (d,  $J = 8.3$  Hz, 2H), 3.76 (s, 3H), 2.71 (q,  $J = 7.5$  Hz, 2H), 1.17 (t,  $J = 7.5$  Hz, 3H).

$^{13}\text{C}$  NMR (101 MHz,  $\text{CDCl}_3$ )  $\delta$  161.64, 148.50, 139.73, 135.83, 131.59, 131.36, 130.83, 130.31, 125.75, 122.13, 121.65, 119.96, 114.62, 29.88, 23.02, 14.60.

HRMS (ESI): calcd for  $\text{C}_{18}\text{H}_{17}\text{ClNO}^+$   $[\text{M}+\text{H}]^+$ : 298.0993; found: 298.0981.

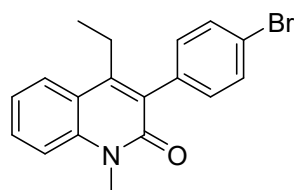

**5m**

### 3-(4-bromophenyl)-4-ethyl-1-methylquinolin-2(1H)-one

Pale yellow solid, prepared according to the general procedure from 2-(methyl(phenyl)amino)-2-oxoacetic acid (65 mg, 0.36 mmol) and 1-bromo-4-(2-nitrobut-1-en-1-yl)benzene (77 mg, 0.3 mmol), 12 h, 66.5 mg, 65 % yield.

$^1\text{H}$  NMR (400 MHz,  $\text{CDCl}_3$ )  $\delta$  7.83 (d,  $J = 8.1$  Hz, 1H), 7.60 (t,  $J = 7.8$  Hz, 1H), 7.47 – 7.39 (m, 3H), 7.30 (t,  $J = 7.7$  Hz, 1H), 7.20 (d,  $J = 8.2$  Hz, 2H), 3.76 (s, 3H), 2.71 (q,  $J = 7.5$  Hz, 2H), 1.17 (t,  $J = 7.5$  Hz, 3H).

$^{13}\text{C}$  NMR (101 MHz,  $\text{CDCl}_3$ )  $\delta$  161.71 , 148.55 , 139.73 , 135.33 , 133.43 , 130.93 (d,  $J = 19.2$  Hz), 130.29 , 128.65 , 125.75 , 122.11 , 119.97 , 114.62 , 29.89 , 23.02 , 14.59 .  
HRMS (ESI): calcd for  $\text{C}_{18}\text{H}_{17}\text{BrNO}^+$   $[\text{M}+\text{H}]^+$ : 342.0488; found: 342.0479.

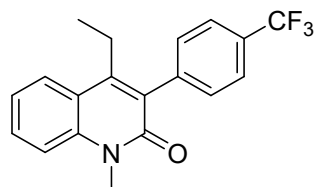

**5n**

#### 4-ethyl-1-methyl-3-(4-(trifluoromethyl)phenyl)quinolin-2(1H)-one

Pale yellow solid, prepared according to the general procedure from 2-(methyl(phenyl)amino)-2-oxoacetic acid (65 mg, 0.36 mmol) and 1-(2-nitrobut-1-en-1-yl)-4-(trifluoromethyl)benzene (74 mg, 0.3 mmol), 11 h, 57.7 mg, 79 % yield.

$^1\text{H}$  NMR (400 MHz,  $\text{CDCl}_3$ )  $\delta$  7.85 (d,  $J = 8.0$  Hz, 1H), 7.71 (d,  $J = 8.0$  Hz, 2H), 7.62 (t,  $J = 7.8$  Hz, 1H), 7.45 (d,  $J = 8.4$  Hz, 1H), 7.39 (d,  $J = 7.9$  Hz, 2H), 7.32 (t,  $J = 7.6$  Hz, 1H), 3.77 (s, 3H), 2.70 (q,  $J = 7.5$  Hz, 2H), 1.18 (t,  $J = 7.6$  Hz, 3H).

$^{13}\text{C}$  NMR (101 MHz,  $\text{CDCl}_3$ )  $\delta$  161.51 , 148.67 , 140.77 , 139.79 , 130.68, 130.49 , 130.10 , 129.61 (q,  $J = 23.9$  Hz) , 125.79 , 125.39 (q,  $J = 3.8$  Hz), 124.27 (q,  $J = 272.4$  Hz) , 122.22 , 119.87 , 114.68 , 29.87 , 23.03 , 14.60 .

$^{19}\text{F}$  NMR (376 MHz,  $\text{CDCl}_3$ )  $\delta$  -62.52 .

HRMS (ESI): calcd for  $\text{C}_{19}\text{H}_{17}\text{F}_3\text{NO}^+$   $[\text{M}+\text{H}]^+$ : 332.1257; found: 332.1255.

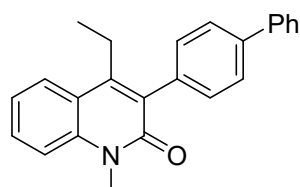

**5o**

#### 3-([1,1'-biphenyl]-4-yl)-4-ethyl-1-methylquinolin-2(1H)-one

Pale yellow solid, prepared according to the general procedure from 2-(methyl(phenyl)amino)-2-oxoacetic acid (65 mg, 0.36 mmol) and 4-(2-nitrobut-1-en-1-yl)-1,1'-biphenyl (76 mg, 0.3 mmol), 12 h, 53.9 mg, 53 % yield.

$^1\text{H}$  NMR (400 MHz,  $\text{CDCl}_3$ )  $\delta$  7.85 (d,  $J = 8.0$  Hz, 1H), 7.67 (t,  $J = 7.8$  Hz, 4H), 7.60 (t,  $J = 7.8$  Hz, 1H), 7.45 (dd,  $J = 13.0, 5.4$  Hz, 3H), 7.32 (tt,  $J = 12.8, 6.4$  Hz, 4H), 3.78 (s, 3H), 2.78 (q,  $J = 7.5$  Hz, 2H), 1.22 (t,  $J = 7.5$  Hz, 3H).

$^{13}\text{C}$  NMR (101 MHz,  $\text{CDCl}_3$ )  $\delta$  162.06 , 148.32 , 141.11 , 140.25 , 139.73 , 135.92 , 131.73 , 130.02 (d,  $J = 10.3$  Hz), 128.75 , 127.18 (d,  $J = 2.2$  Hz), 125.75 , 122.01 , 120.16 , 114.57 , 29.88 , 23.10 , 14.72 .

HRMS (ESI): calcd for  $\text{C}_{24}\text{H}_{22}\text{NO}^+$   $[\text{M}+\text{H}]^+$ : 340.1696; found: 340.1700.

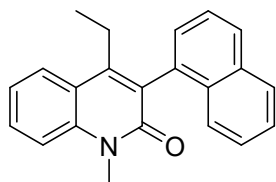

**5p**

4-ethyl-1-methyl-3-(naphthalen-1-yl)quinolin-2(1H)-one

Pale yellow solid, prepared according to the general procedure from 2-(methyl(phenyl)amino)-2-oxoacetic acid (65 mg, 0.36 mmol) and 1-(2-nitrobut-1-en-1-yl)naphthalene (68 mg, 0.3 mmol), 12 h, 63.9 mg, 68 % yield.

$^1\text{H NMR}$  (400 MHz,  $\text{CDCl}_3$ )  $\delta$  7.88 (t,  $J = 9.5$  Hz, 3H), 7.66 – 7.60 (m, 1H), 7.59 – 7.52 (m, 2H), 7.47 (dd,  $J = 16.3, 8.3$  Hz, 2H), 7.40 – 7.29 (m, 3H), 3.79 (s, 3H), 2.72 (dq,  $J = 15.1, 7.5$  Hz, 1H), 2.46 (dq,  $J = 15.1, 7.6$  Hz, 1H), 1.08 (t,  $J = 7.6$  Hz, 3H).

$^{13}\text{C NMR}$  (101 MHz,  $\text{CDCl}_3$ )  $\delta$  161.76, 149.75, 140.02, 134.65, 133.82, 132.20, 130.31 (d,  $J = 15.8$  Hz), 128.43, 128.12, 127.07, 126.22, 125.81 (d,  $J = 3.6$  Hz), 125.58, 125.21, 122.06, 120.13, 114.69, 29.91, 23.41, 14.52.

HRMS (ESI): calcd for  $\text{C}_{22}\text{H}_{20}\text{NO}^+$   $[\text{M}+\text{H}]^+$ : 314.1539; found: 314.1540.

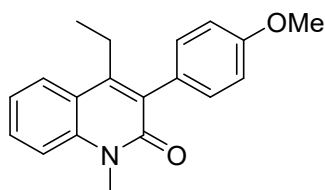

**5q**

4-ethyl-3-(4-methoxyphenyl)-1-methylquinolin-2(1H)-one

Pale yellow solid, prepared according to the general procedure from 2-(methyl(phenyl)amino)-2-oxoacetic acid (65 mg, 0.36 mmol) and 1-methoxy-4-(2-nitrobut-1-en-1-yl)benzene (62 mg, 0.3 mmol), 12 h, 64.2 mg, 73 % yield.

$^1\text{H NMR}$  (400 MHz, Chloroform-*d*)  $\delta$  7.83 (d,  $J = 8.1$  Hz, 1H), 7.57 (t,  $J = 7.9$  Hz, 1H), 7.42 (d,  $J = 8.4$  Hz, 1H), 7.29 (d,  $J = 7.7$  Hz, 1H), 7.18 (d,  $J = 8.1$  Hz, 2H), 6.99 (d,  $J = 8.3$  Hz, 2H), 3.85 (s, 3H), 3.76 (s, 3H), 2.74 (q,  $J = 7.5$  Hz, 2H), 1.18 (t,  $J = 7.5$  Hz, 3H).

$^{13}\text{C NMR}$  (101 MHz, Chloroform-*d*)  $\delta$  162.21, 158.88, 148.33, 139.65, 131.72, 130.69, 129.93, 129.11, 125.71, 121.96, 120.22, 114.52, 113.88, 55.27, 29.90, 23.04, 14.64.

HRMS (ESI): calcd for  $\text{C}_{19}\text{H}_{20}\text{NO}_2^+$   $[\text{M}+\text{H}]^+$ : 294.1489; found: 294.1488.

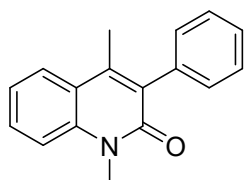

**5r**

1,4-dimethyl-3-phenylquinolin-2(1H)-one

Pale yellow solid, prepared according to the general procedure from 2-(methyl(phenyl)amino)-2-

oxoacetic acid (65 mg, 0.36 mmol) and (2-nitroprop-1-en-1-yl)benzene (49 mg, 0.3 mmol), 12 h, 62.7 mg, 84 % yield.

$^1\text{H NMR}$  (400 MHz,  $\text{CDCl}_3$ )  $\delta$  7.83 (d,  $J = 8.0$  Hz, 1H), 7.61 (t,  $J = 7.8$  Hz, 1H), 7.43 (dt,  $J = 13.8, 7.3$  Hz, 4H), 7.33 – 7.26 (m, 3H), 3.79 (s, 3H), 2.35 (s, 3H).

$^{13}\text{C NMR}$  (101 MHz,  $\text{CDCl}_3$ )  $\delta$  161.71, 142.36, 139.17, 136.83, 132.49, 130.10 (d,  $J = 6.8$  Hz), 128.21, 127.45, 125.68, 122.00, 121.58, 114.24, 29.82, 16.89.

HRMS (ESI): calcd for  $\text{C}_{17}\text{H}_{16}\text{NO}^+$   $[\text{M}+\text{H}]^+$ : 250.1226; found: 250.1213.

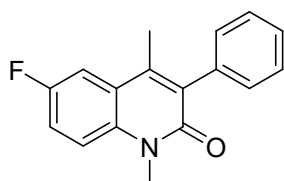

**5s**

6-fluoro-1,4-dimethyl-3-phenylquinolin-2(1H)-one

Pale yellow solid, prepared according to the general procedure from 2-((4-fluorophenyl)(methyl)amino)-2-oxoacetic acid (71 mg, 0.36 mmol) and (2-nitroprop-1-en-1-yl)benzene (49 mg, 0.3 mmol), 12 h, 63.3 mg, 79 % yield.

$^1\text{H NMR}$  (400 MHz,  $\text{CDCl}_3$ )  $\delta$  7.43 – 7.34 (m, 3H), 7.30 (dd,  $J = 8.8, 5.9$  Hz, 2H), 7.25 (dd,  $J = 7.5, 2.6$  Hz, 1H), 7.19 (dd,  $J = 6.2, 2.0$  Hz, 2H), 3.69 (s, 3H), 2.22 (s, 3H).

$^{13}\text{C NMR}$  (101 MHz,  $\text{CDCl}_3$ )  $\delta$  161.37, 161.37, 157.93 (d,  $J = 241.2$  Hz), 141.46 (d,  $J = 3.1$  Hz), 136.48, 135.73 (d,  $J = 1.0$  Hz), 133.69, 129.92, 128.26, 127.65, 122.71 (d,  $J = 7.9$  Hz), 117.64 (d,  $J = 23.6$  Hz), 115.69 (d,  $J = 8.1$  Hz), 111.16 (d,  $J = 23.3$  Hz), 30.12, 16.97.

$^{19}\text{F NMR}$  (376 MHz,  $\text{CDCl}_3$ )  $\delta$  -120.80.

HRMS (ESI): calcd for  $\text{C}_{17}\text{H}_{15}\text{FNO}^+$   $[\text{M}+\text{H}]^+$ : 268.1132; found: 268.1138.

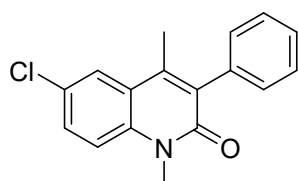

**5t**

6-chloro-1,4-dimethyl-3-phenylquinolin-2(1H)-one

Pale yellow solid, prepared according to the general procedure from 2-((4-chlorophenyl)(methyl)amino)-2-oxoacetic acid (77 mg, 0.36 mmol) and (2-nitroprop-1-en-1-yl)benzene (49 mg, 0.3 mmol), 12 h, 57.7 mg, 68 % yield.

$^1\text{H NMR}$  (400 MHz,  $\text{CDCl}_3$ )  $\delta$  7.69 (d,  $J = 2.3$  Hz, 1H), 7.46 (dd,  $J = 9.0, 2.3$  Hz, 1H), 7.38 (t,  $J = 7.3$  Hz, 2H), 7.31 (d,  $J = 7.3$  Hz, 1H), 7.27 (d,  $J = 9.0$  Hz, 1H), 7.18 (d,  $J = 5.7$  Hz, 2H), 3.68 (s, 3H), 2.23 (s, 3H).

$^{13}\text{C NMR}$  (101 MHz,  $\text{CDCl}_3$ )  $\delta$  161.39, 141.34, 137.72, 136.35, 133.61, 129.95 (d,  $J = 8.6$  Hz), 128.26, 127.63 (d,  $J = 10.6$  Hz), 125.18, 122.82, 115.60, 30.00, 16.89.

HRMS (ESI): calcd for  $\text{C}_{17}\text{H}_{15}\text{ClNO}^+$   $[\text{M}+\text{H}]^+$ : 284.0837; found: 284.0834.

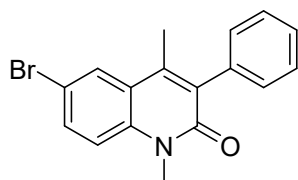

**5u**

**6-bromo-1,4-dimethyl-3-phenylquinolin-2(1H)-one**

Pale yellow solid, prepared according to the general procedure from 2-((4-bromophenyl)(methyl)amino)-2-oxoacetic acid (93 mg, 0.36 mmol) and (2-nitroprop-1-en-1-yl)benzene (49 mg, 0.3 mmol), 12 h, 60.8 mg, 62 % yield.

$^1\text{H}$  NMR (400 MHz,  $\text{CDCl}_3$ )  $\delta$  7.84 (d,  $J = 2.3$  Hz, 1H), 7.59 (dd,  $J = 9.0, 2.2$  Hz, 1H), 7.38 (tt,  $J = 7.8, 1.5$  Hz, 2H), 7.31 (ddd,  $J = 7.5, 3.9, 1.4$  Hz, 1H), 7.24 – 7.16 (m, 3H), 3.67 (s, 3H), 2.23 (s, 3H).

$^{13}\text{C}$  NMR (101 MHz,  $\text{CDCl}_3$ )  $\delta$  161.37, 141.29, 138.12, 136.32, 133.58, 132.76, 129.91, 128.24 (d,  $J = 5.9$  Hz), 127.69, 123.27, 115.90, 115.01, 29.96, 16.89.

HRMS (ESI): calcd for  $\text{C}_{17}\text{H}_{15}\text{BrNO}^+$   $[\text{M}+\text{H}]^+$ : 328.0332; found: 328.0337.

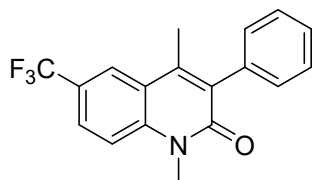

**5v**

**1,4-dimethyl-3-phenyl-6-(trifluoromethyl)quinolin-2(1H)-one**

Pale yellow solid, prepared according to the general procedure from 2-(methyl(4-(trifluoromethyl)phenyl)amino)-2-oxoacetic acid (89 mg, 0.36 mmol) and (2-nitroprop-1-en-1-yl)benzene (49 mg, 0.3 mmol), 12 h, 49.5 mg, 76 % yield.

$^1\text{H}$  NMR (400 MHz, Chloroform-*d*)  $\delta$  8.00 – 7.95 (m, 1H), 7.73 (dd,  $J = 8.9, 2.1$  Hz, 1H), 7.45 – 7.36 (m, 3H), 7.35 – 7.30 (m, 1H), 7.21 – 7.18 (m, 2H), 3.72 (s, 3H), 2.29 (s, 3H).

$^{13}\text{C}$  NMR (101 MHz, Chloroform-*d*)  $\delta$  161.68, 142.07, 141.26, 136.10, 133.84, 129.88, 128.36, 127.84, 126.50 (q,  $J = 3.6$  Hz), 124.21 (q,  $J = 272.0$  Hz), 124.16 (q,  $J = 33.0$  Hz), 123.13 (q,  $J = 4.2$  Hz), 121.39, 114.68, 30.12, 16.89.

$^{19}\text{F}$  NMR (377 MHz, Chloroform-*d*)  $\delta$  -61.65.

HRMS (ESI): calcd for  $\text{C}_{18}\text{H}_{15}\text{F}_3\text{NO}^+$   $[\text{M}+\text{H}]^+$ : 218.1100; found: 218.1092.

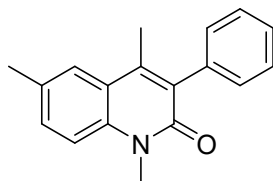

**5w**

**1,4,6-trimethyl-3-phenylquinolin-2(1H)-one**

Pale yellow solid, prepared according to the general procedure from 2-(methyl(*p*-tolyl)amino)-2-oxoacetic acid (70 mg, 0.36 mmol) and (2-nitroprop-1-en-1-yl)benzene (49 mg, 0.3 mmol), 12 h, 52.9 mg, 67 % yield.

$^1\text{H}$  NMR (400 MHz,  $\text{CDCl}_3$ )  $\delta$  7.51 (s, 1H), 7.40 – 7.34 (m, 2H), 7.34 – 7.25 (m, 2H), 7.23 (d,  $J = 8.6$  Hz, 1H), 7.20 – 7.16 (m, 2H), 3.67 (s, 3H), 2.39 (s, 3H), 2.23 (s, 3H).

$^{13}\text{C}$  NMR (101 MHz,  $\text{CDCl}_3$ )  $\delta$  161.57, 142.09, 137.08 (d,  $J = 17.2$  Hz), 132.45, 131.31 (d,  $J = 13.1$  Hz), 130.08, 128.17, 127.37, 125.58, 121.48, 114.15, 29.80, 20.96, 16.89.

HRMS (ESI): calcd for  $\text{C}_{18}\text{H}_{18}\text{NO}^+$   $[\text{M}+\text{H}]^+$ : 264.1383; found: 264.1392.

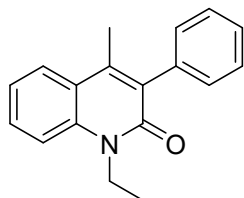

**5x**

1-ethyl-4-methyl-3-phenylquinolin-2(1H)-one

Pale yellow solid, prepared according to the general procedure from 2-(ethyl(phenyl)amino)-2-oxoacetic acid (70 mg, 0.36 mmol) and (2-nitroprop-1-en-1-yl)benzene (49 mg, 0.3 mmol), 12 h, 52.9 mg, 67 % yield.

$^1\text{H}$  NMR (400 MHz, Chloroform-*d*)  $\delta$  7.75 (dd,  $J = 8.1, 1.5$  Hz, 1H), 7.50 (ddd,  $J = 8.6, 7.1, 1.5$  Hz, 1H), 7.40 – 7.33 (m, 3H), 7.32 – 7.25 (m, 1H), 7.23 – 7.17 (m, 3H), 4.33 (q,  $J = 7.1$  Hz, 2H), 2.26 (s, 3H), 1.31 (t,  $J = 7.1$  Hz, 3H).

$^{13}\text{C}$  NMR (101 MHz, Chloroform-*d*)  $\delta$  161.14, 142.23, 138.14, 136.78, 132.48, 130.18, 130.08, 128.17, 127.41, 125.91, 121.86, 121.77, 114.11, 37.73, 16.97, 12.78.

HRMS (ESI): calcd for  $\text{C}_{18}\text{H}_{18}\text{NO}^+$   $[\text{M}+\text{H}]^+$ : 264.1383; found: 264.1388.

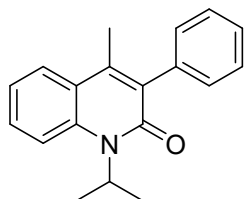

**5y**

1-isopropyl-4-methyl-3-phenylquinolin-2(1H)-one

Pale yellow solid, prepared according to the general procedure from 2-(isopropyl(phenyl)amino)-2-oxoacetic acid (75 mg, 0.36 mmol) and (2-nitroprop-1-en-1-yl)benzene (49 mg, 0.3 mmol), 12 h, 36.6 mg, 44 % yield.

$^1\text{H}$  NMR (400 MHz, Chloroform-*d*)  $\delta$  7.73 (dd,  $J = 8.1, 1.6$  Hz, 1H), 7.55 (d,  $J = 8.7$  Hz, 1H), 7.45 (ddd,  $J = 8.7, 7.1, 1.6$  Hz, 1H), 7.39 – 7.33 (m, 2H), 7.30 – 7.25 (m, 1H), 7.22 – 7.15 (m, 3H), 5.43 (m, 1H), 2.23 (s, 3H), 1.59 (d,  $J = 7.0$  Hz, 6H).

$^{13}\text{C}$  NMR (101 MHz, Chloroform-*d*)  $\delta$  162.02, 141.92, 137.00, 130.14, 129.35, 129.17, 128.24, 128.20, 127.34, 125.99, 122.40, 121.54, 19.96, 16.98.

HRMS (ESI): calcd for  $\text{C}_{19}\text{H}_{20}\text{NO}^+$   $[\text{M}+\text{H}]^+$ : 278.1539; found: 278.1549.

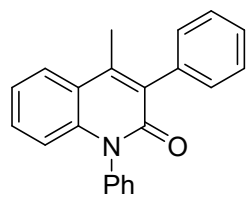

**5z**

4-methyl-1,3-diphenylquinolin-2(1H)-one

Pale yellow solid, prepared according to the general procedure from 2-(diphenylamino)-2-oxoacetic acid (87 mg, 0.36 mmol) and (2-nitroprop-1-en-1-yl)benzene (49 mg, 0.3 mmol), 12 h, 33.6 mg, 36 % yield. (the spectra of **5z** are in accordance with those of the compound reported in the literature Synthesis, 2011, # 10, art. no. H19211SS, p. 1547)

$^1\text{H}$  NMR (400 MHz, Chloroform-*d*)  $\delta$  7.76 (dd,  $J = 8.1, 1.5$  Hz, 1H), 7.49 (dd,  $J = 8.3, 6.8$  Hz, 2H), 7.43 – 7.38 (m, 1H), 7.37 – 7.32 (m, 2H), 7.29 – 7.22 (m, 6H), 7.20 – 7.15 (m, 1H), 6.66 (dd,  $J = 8.5, 1.2$  Hz, 1H), 2.36 (s, 3H).

$^{13}\text{C}$  NMR (101 MHz, Chloroform-*d*)  $\delta$  161.61, 143.22, 140.18, 138.10, 136.11, 132.74, 130.46, 129.98, 129.66, 129.05, 128.61, 128.01, 127.49, 125.37, 122.22, 121.40, 116.15, 17.20.

HRMS (ESI): calcd for  $\text{C}_{22}\text{H}_{18}\text{NO}^+$   $[\text{M}+\text{H}]^+$ : 312.1383; found: 312.1375.



## 4. NMR spectra

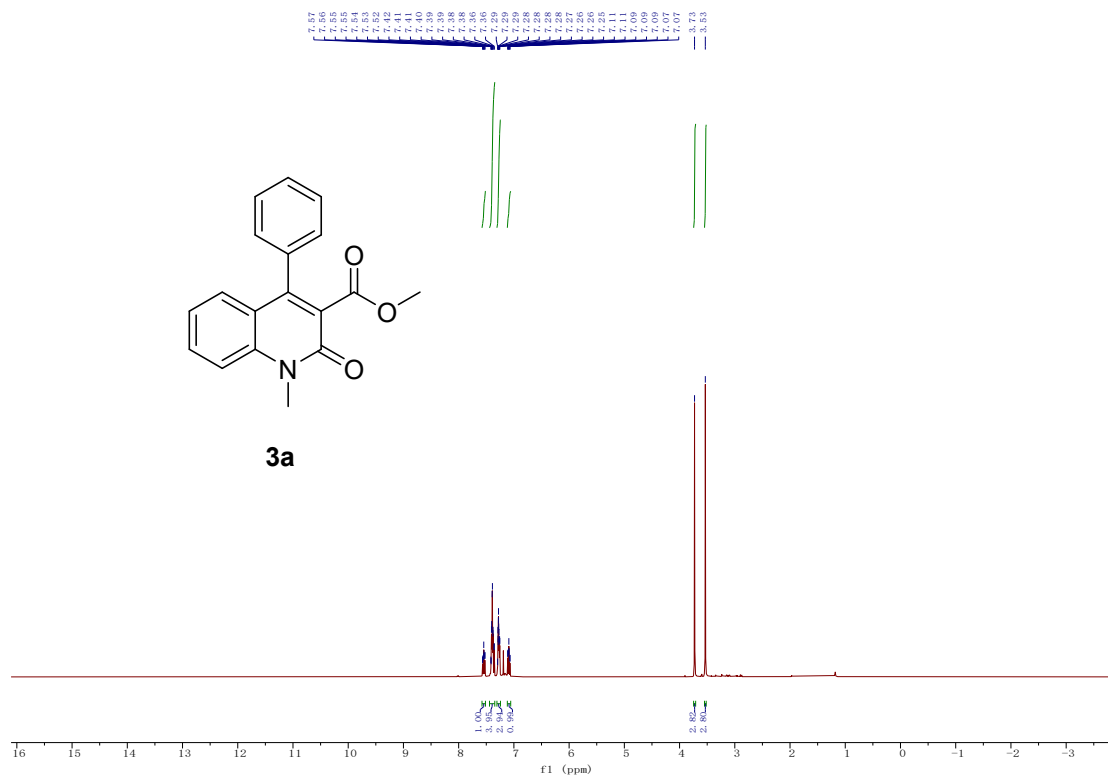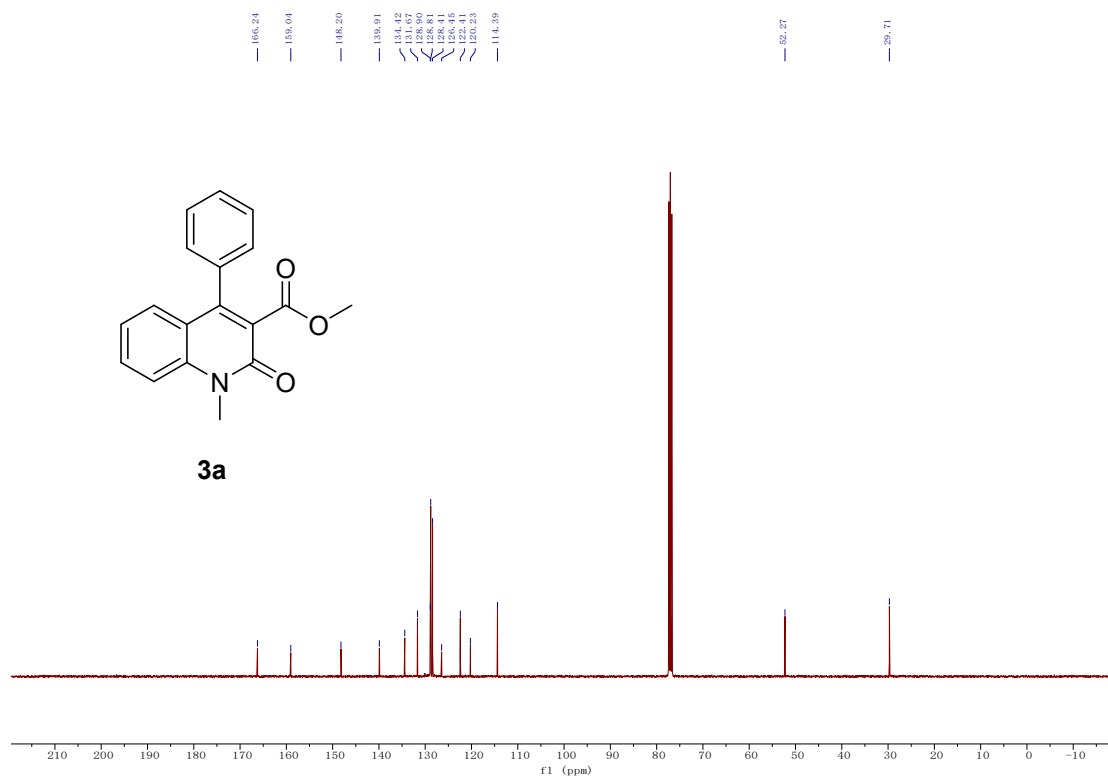

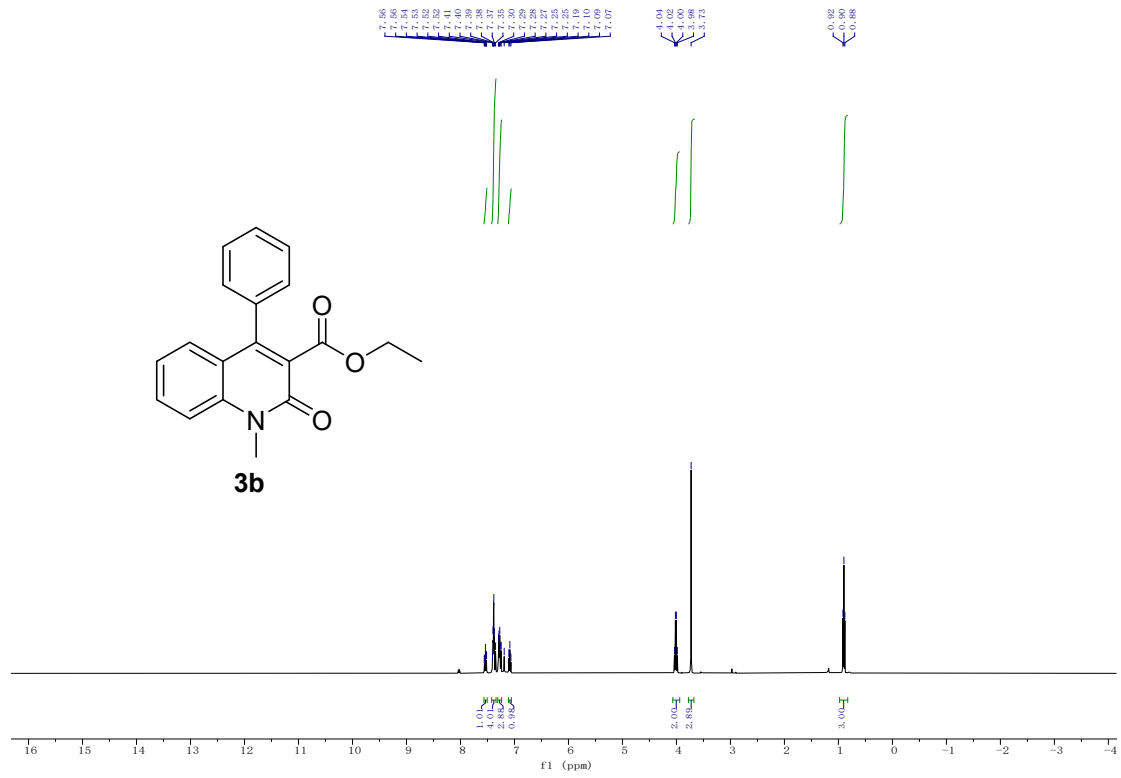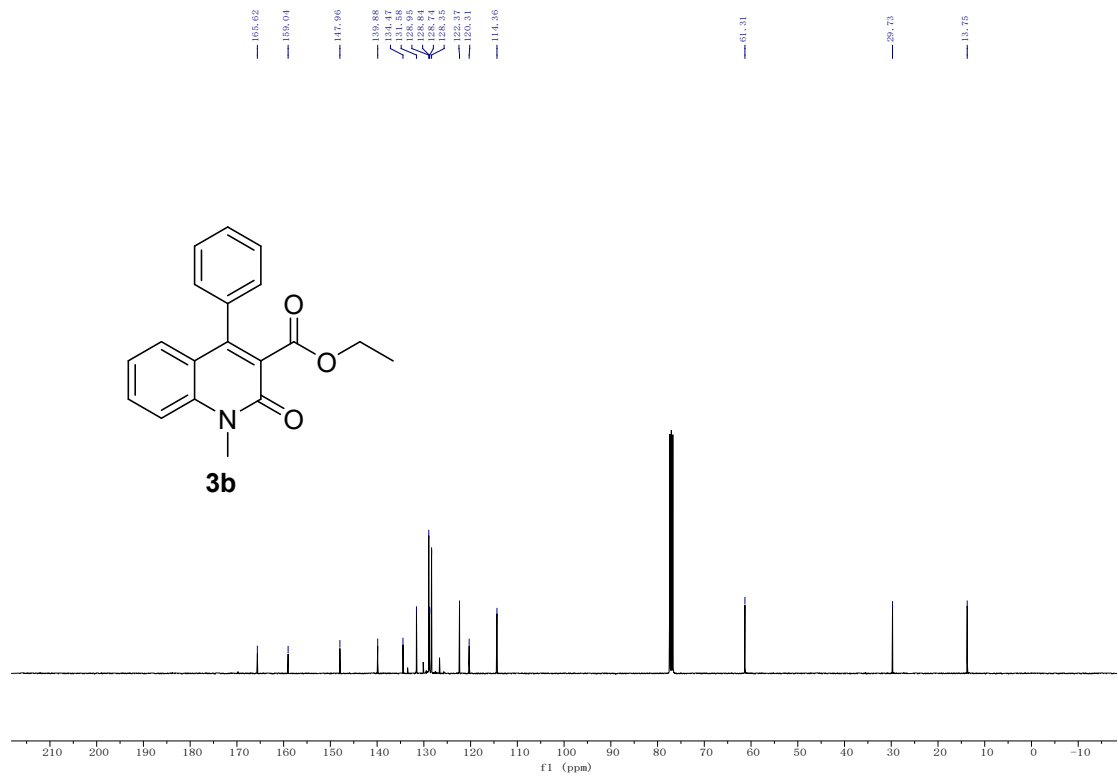

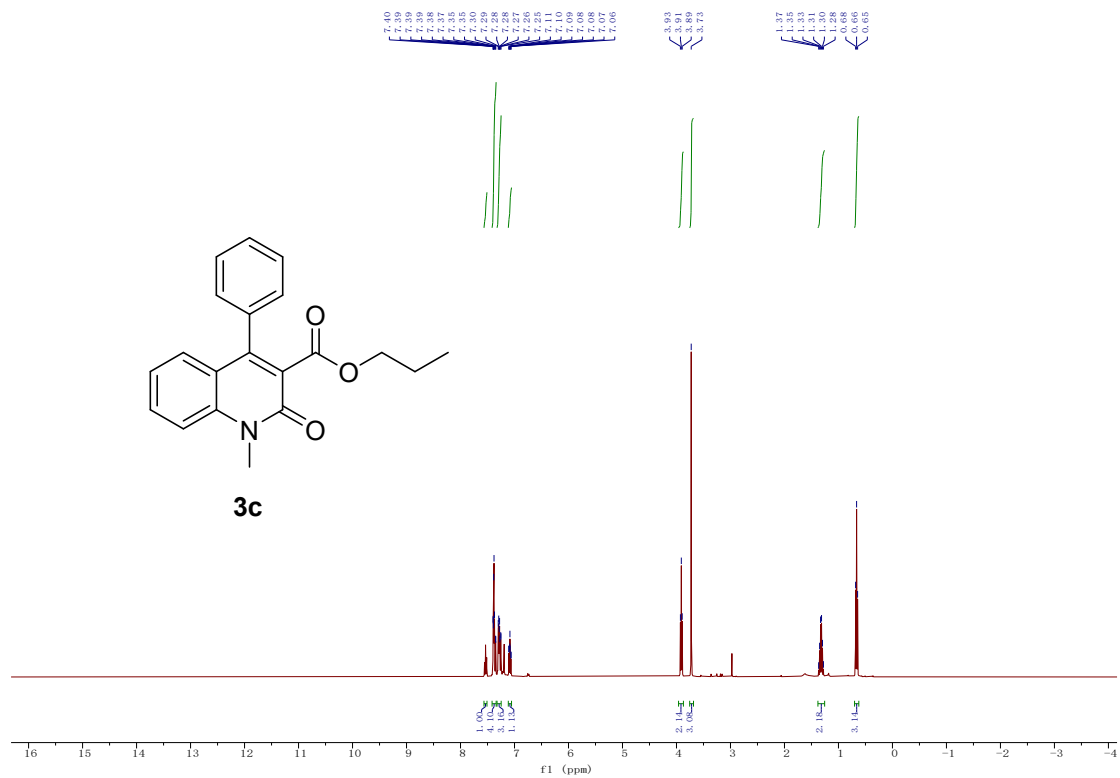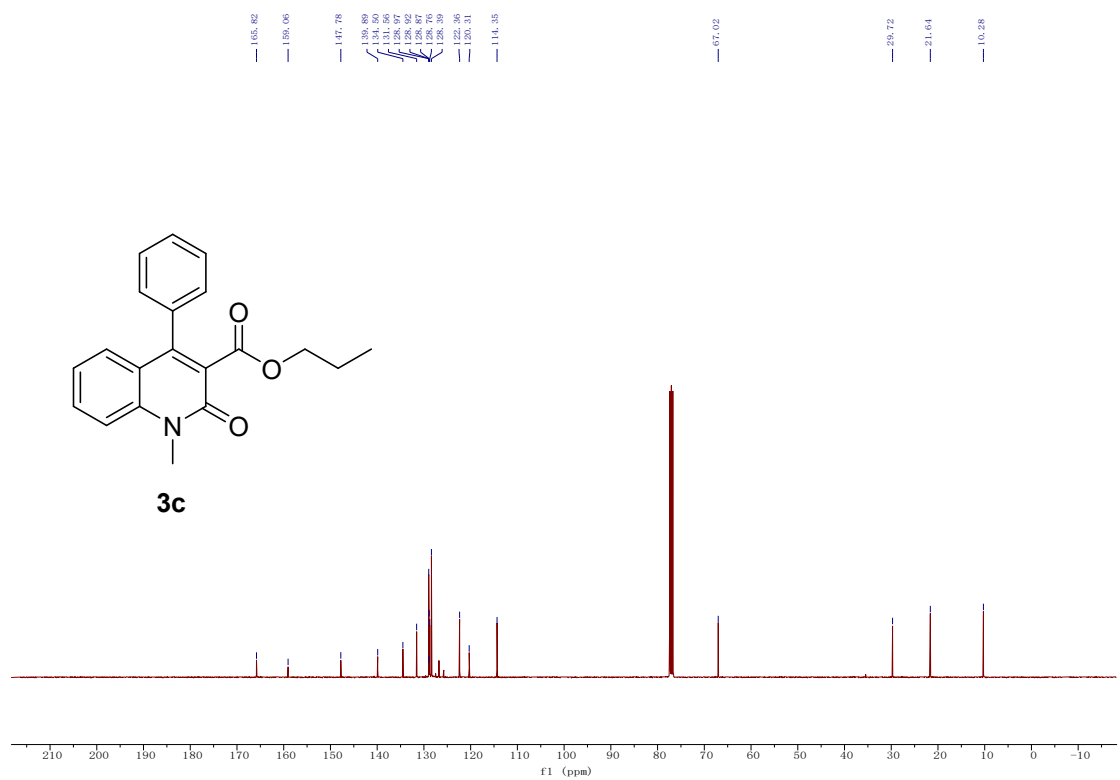

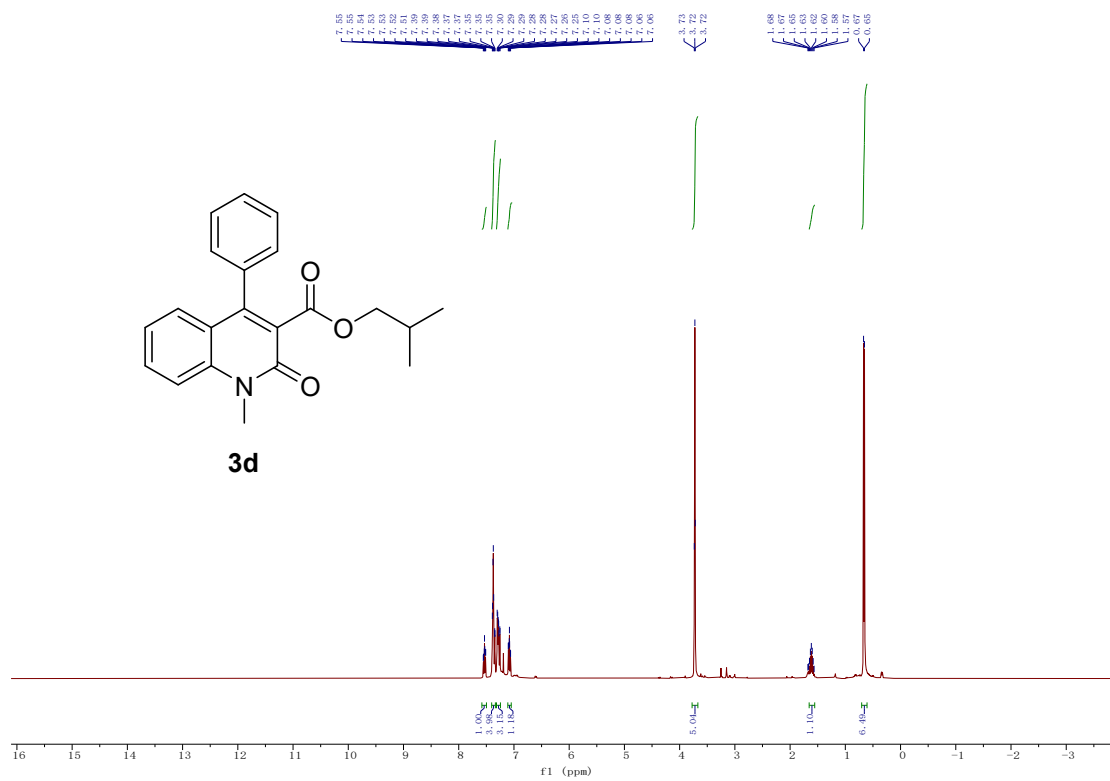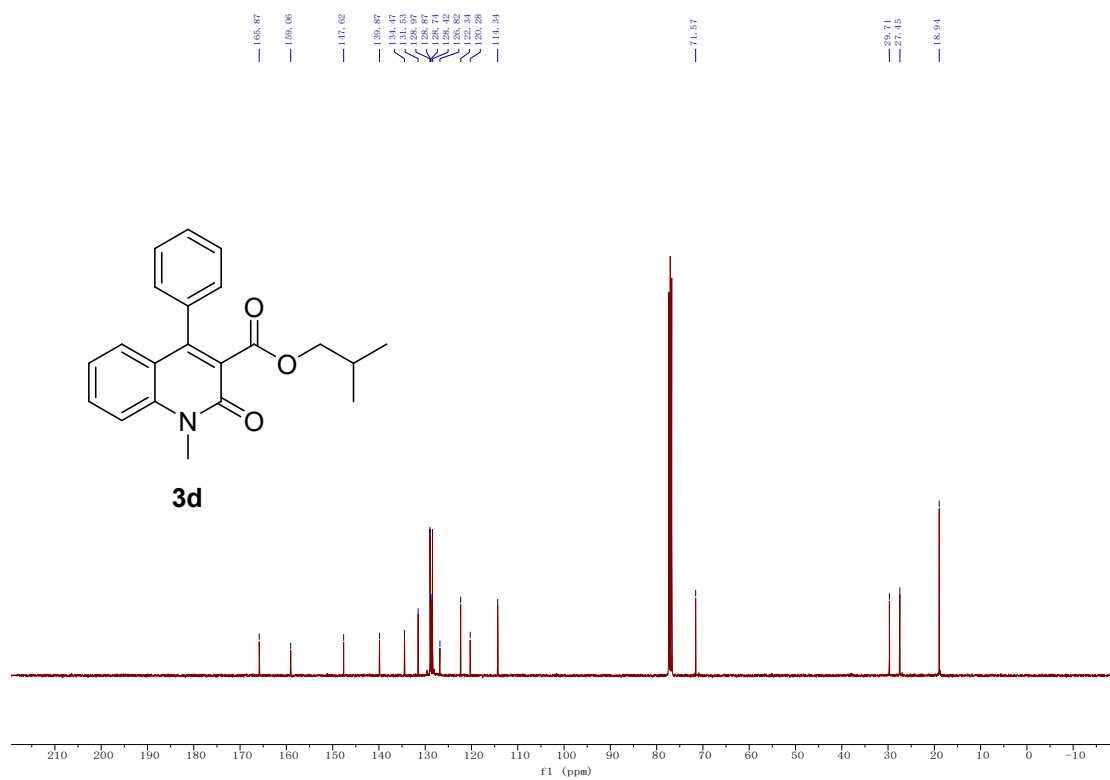



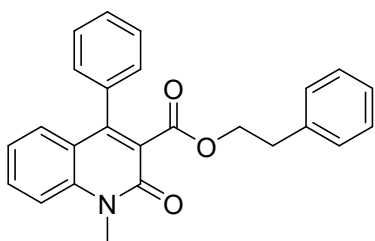

3f

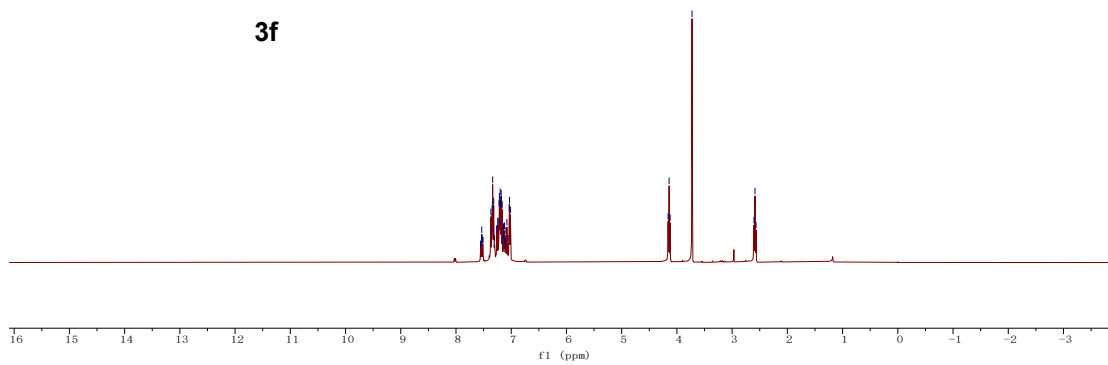

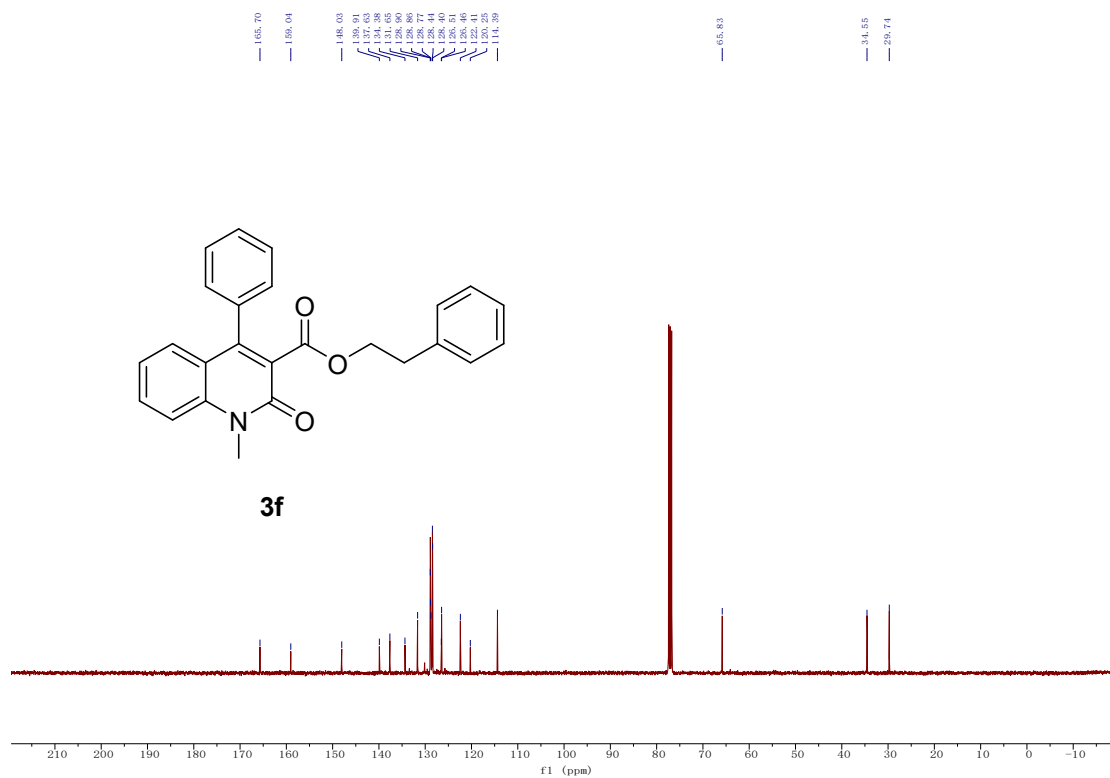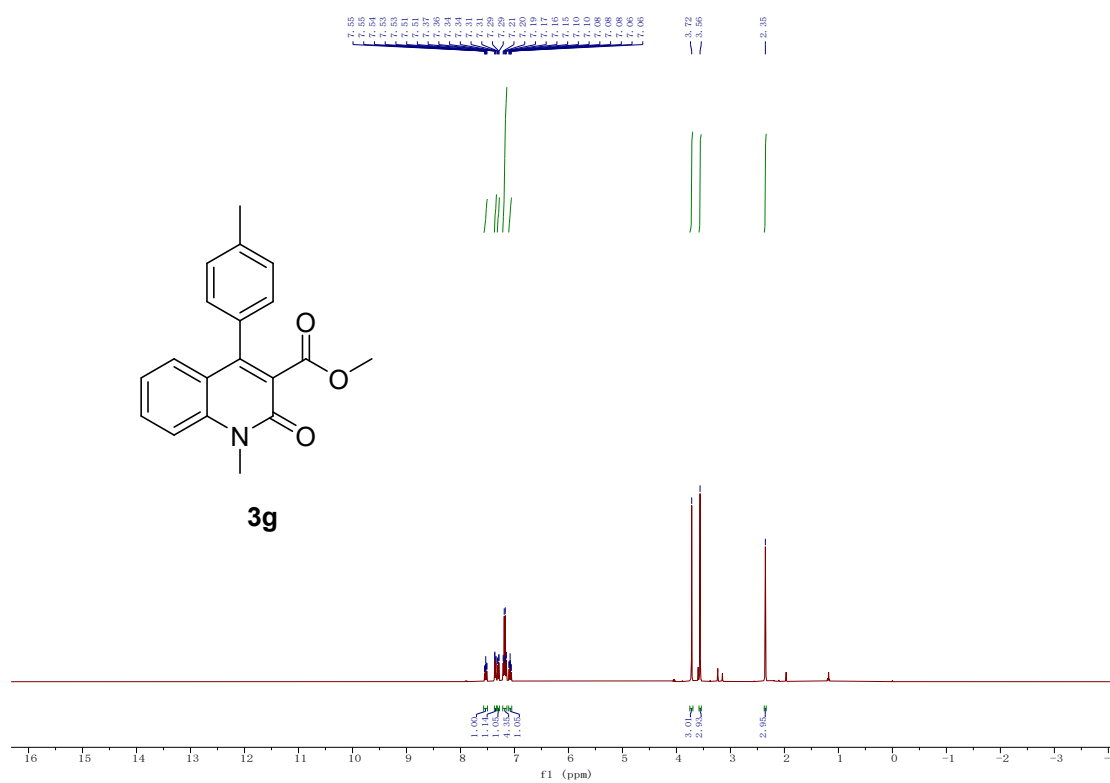





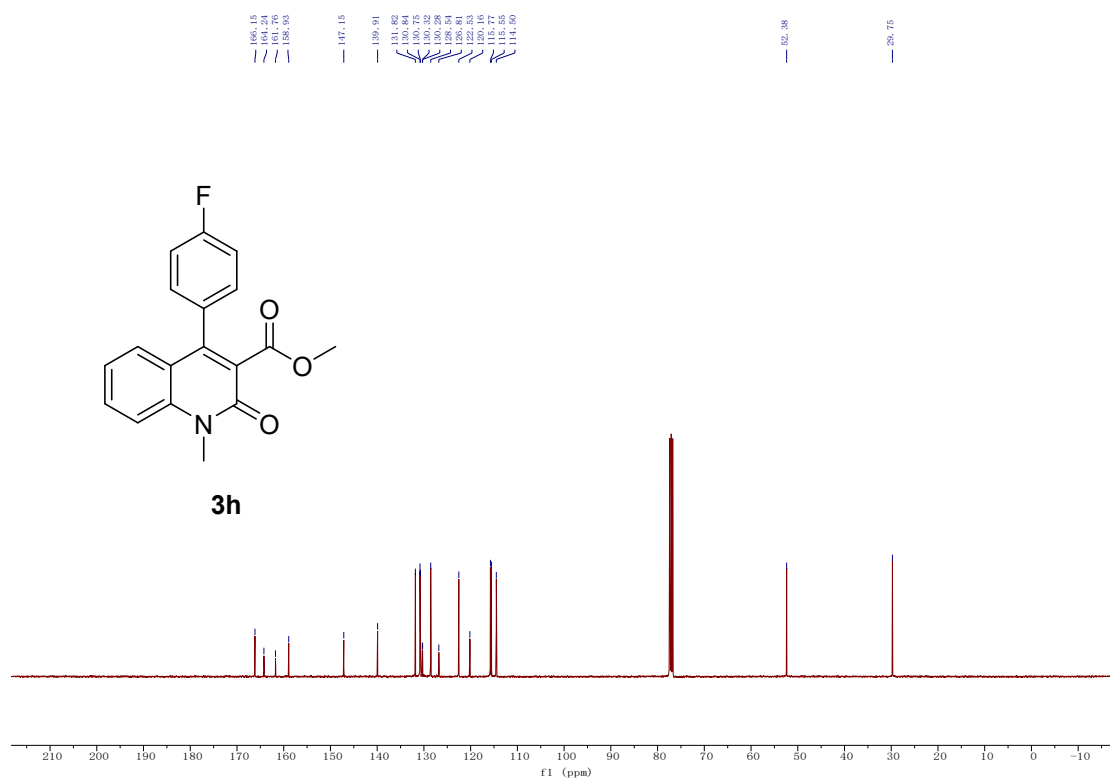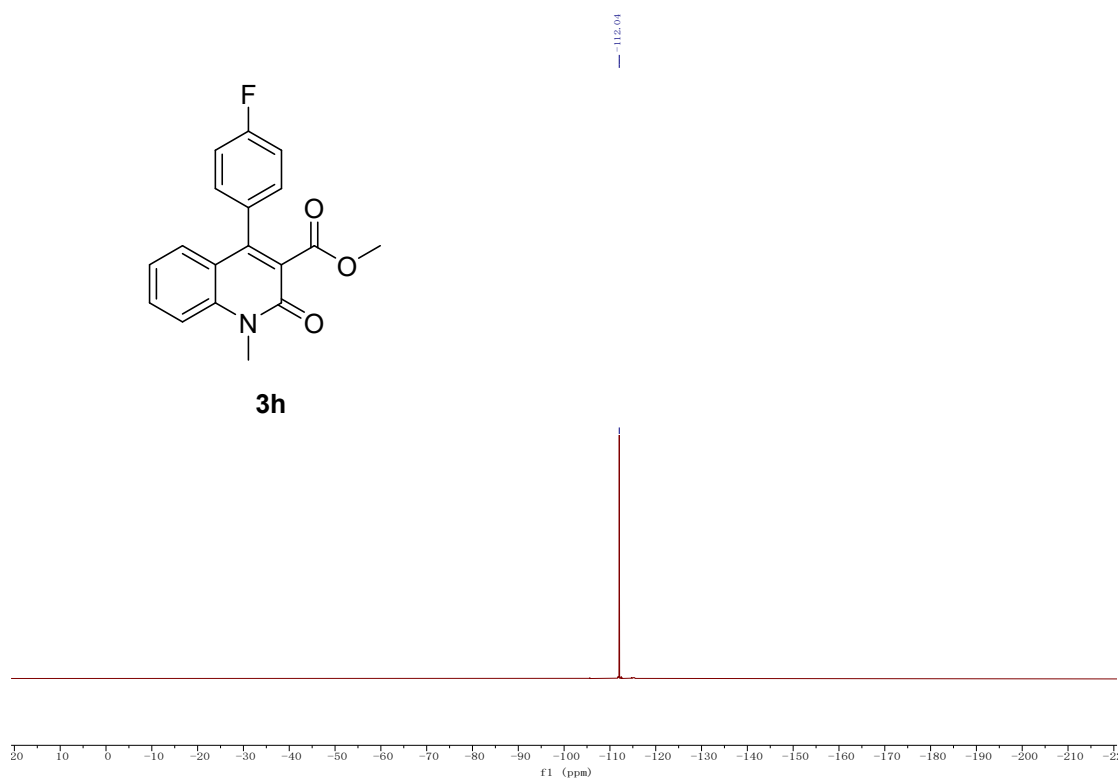



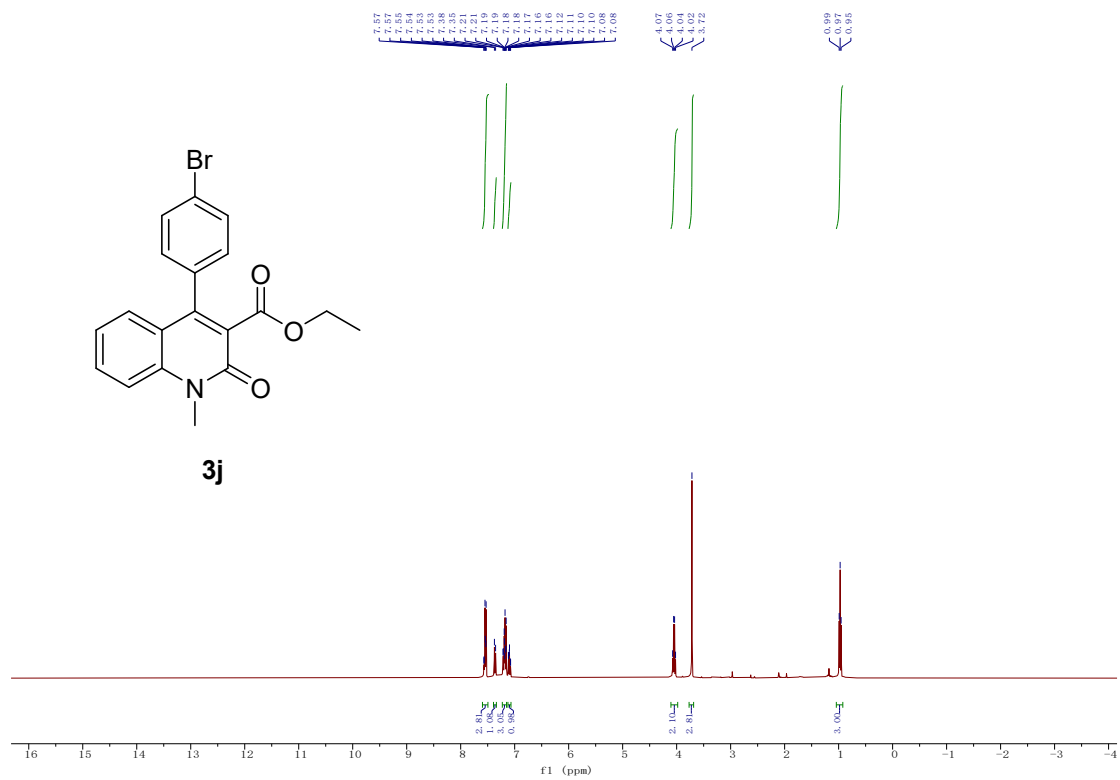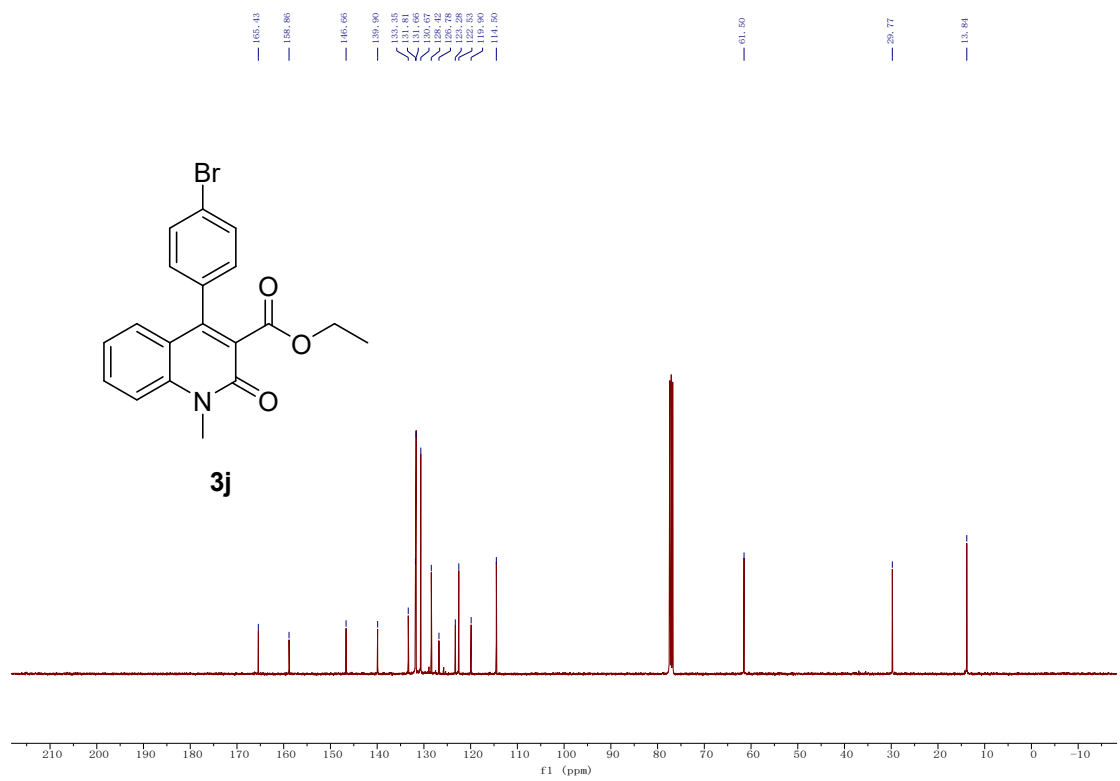



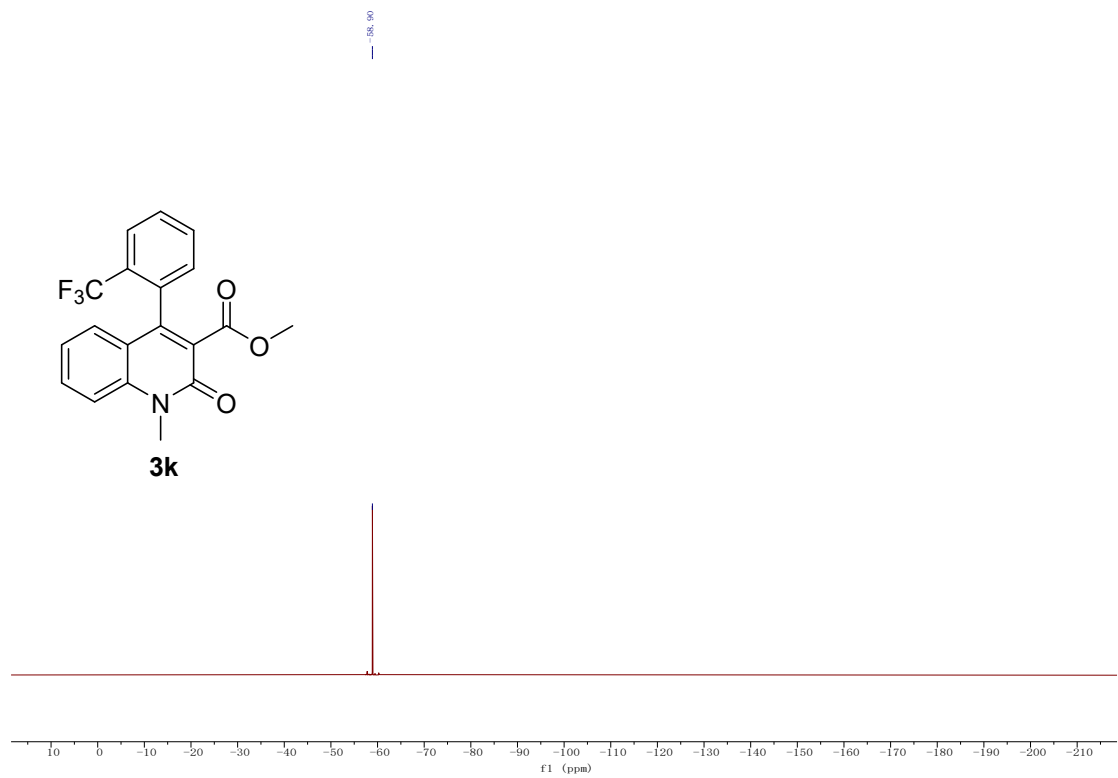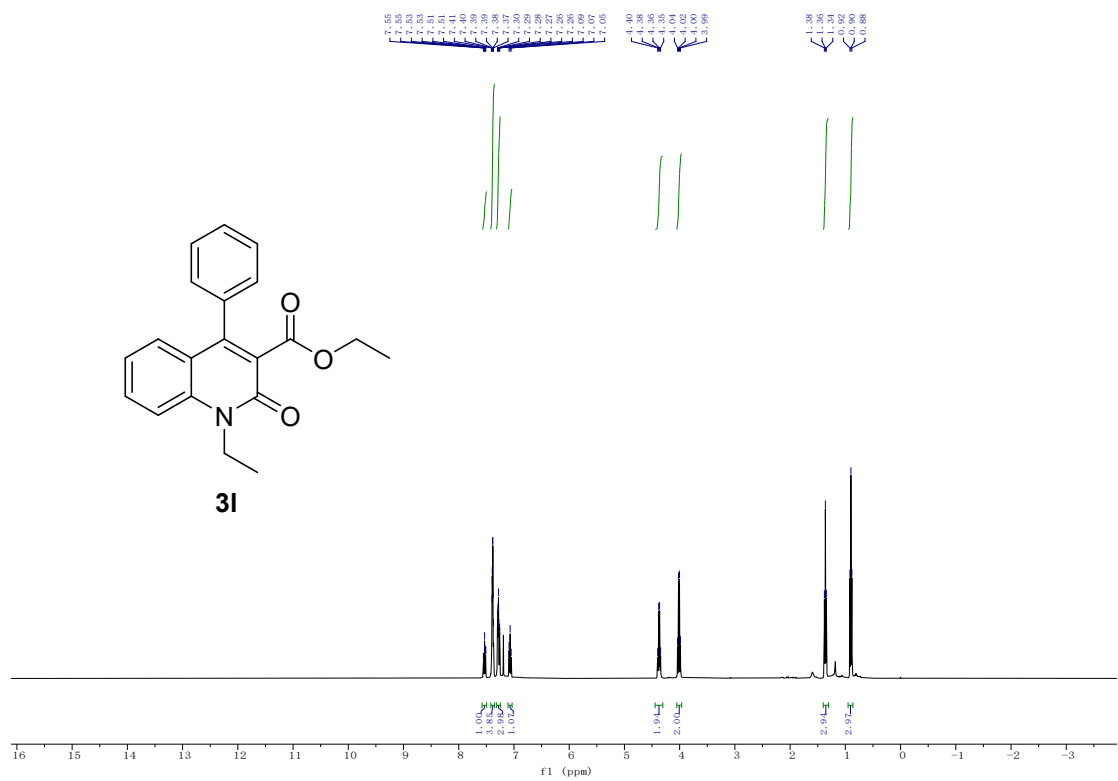



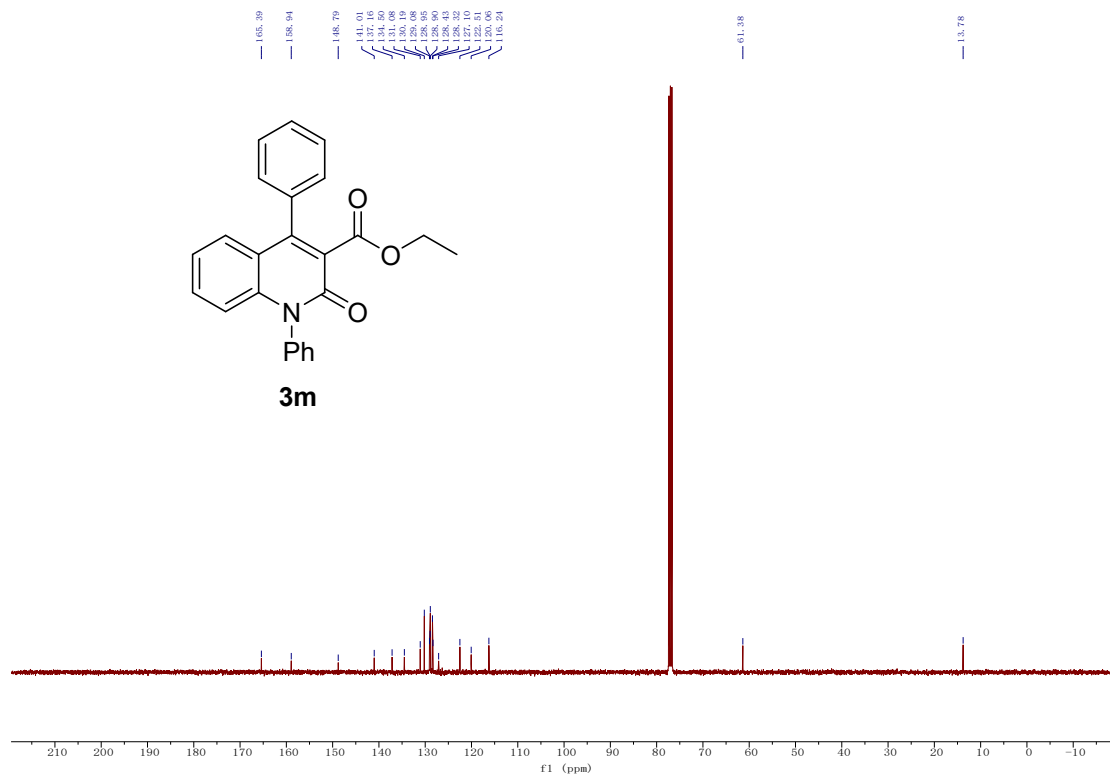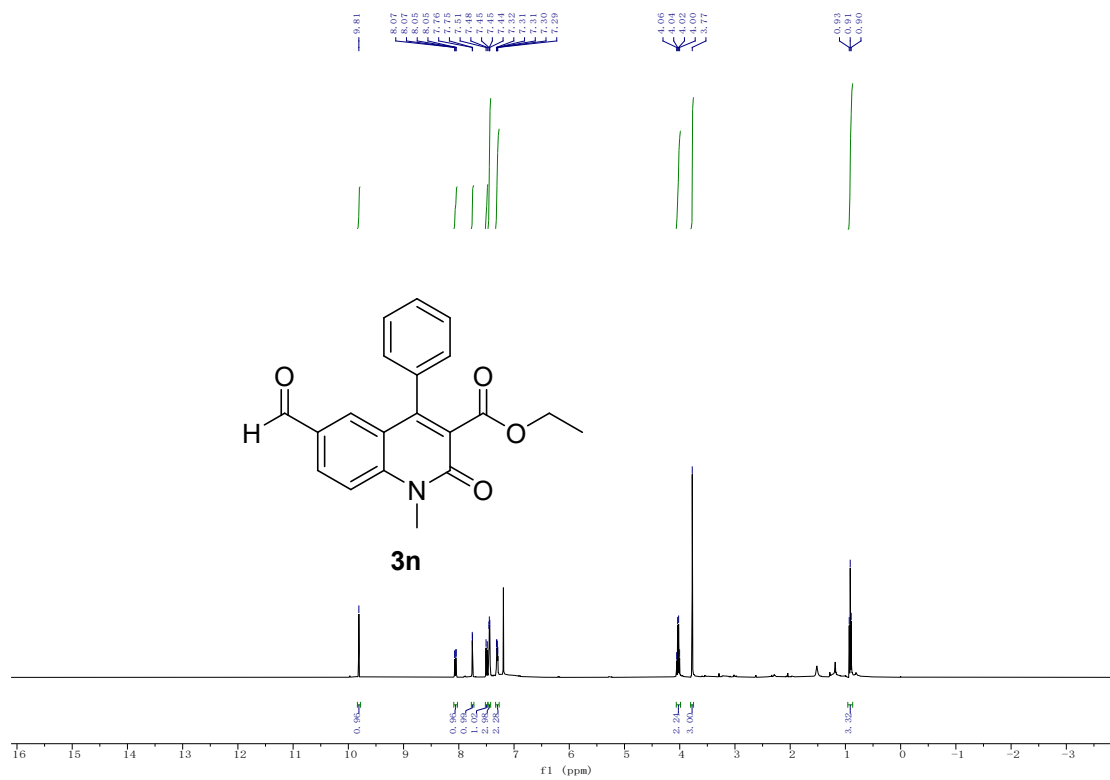

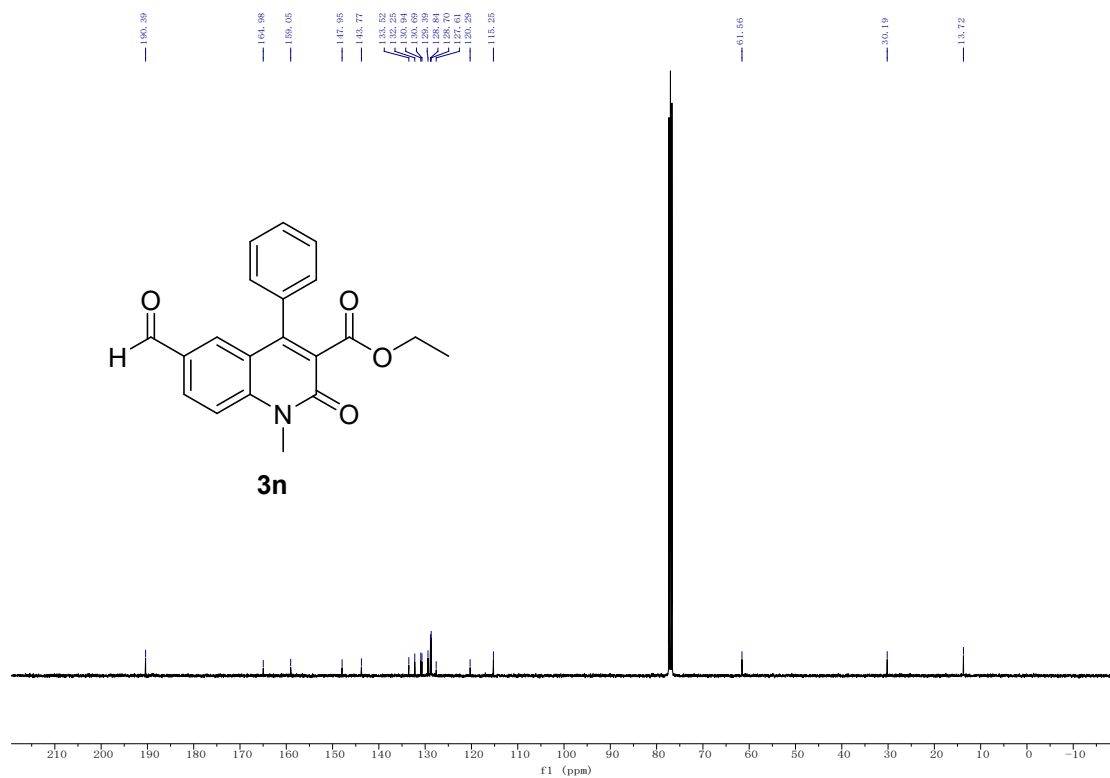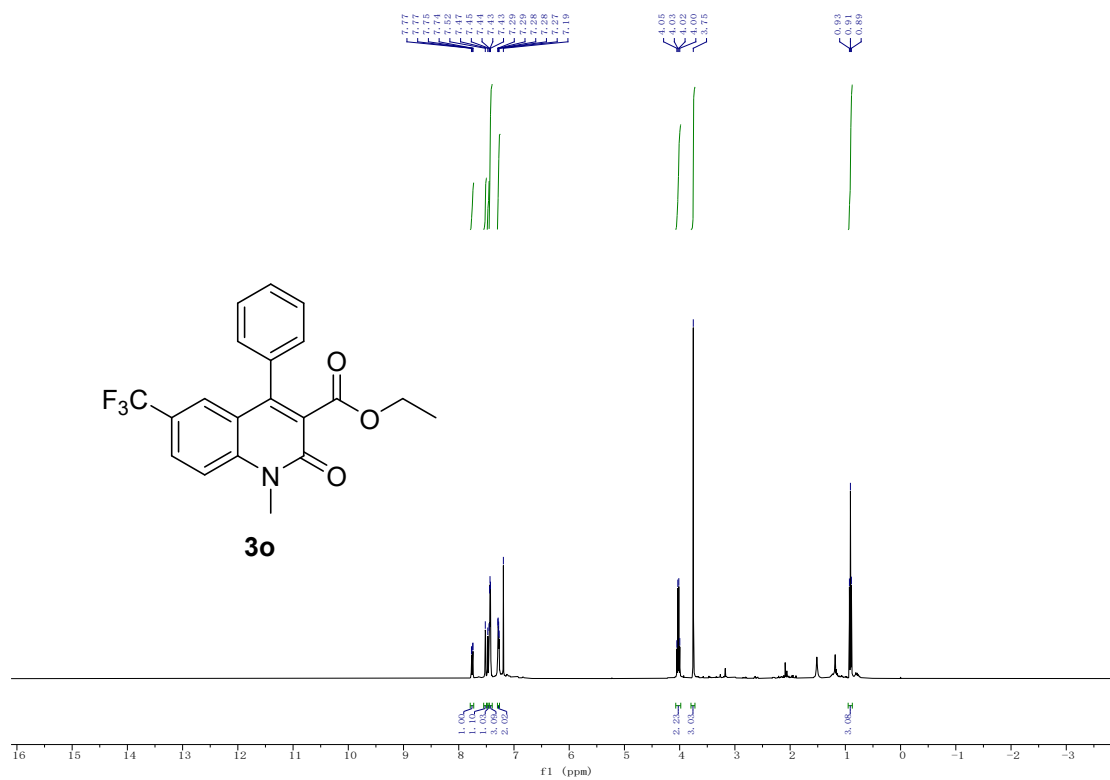





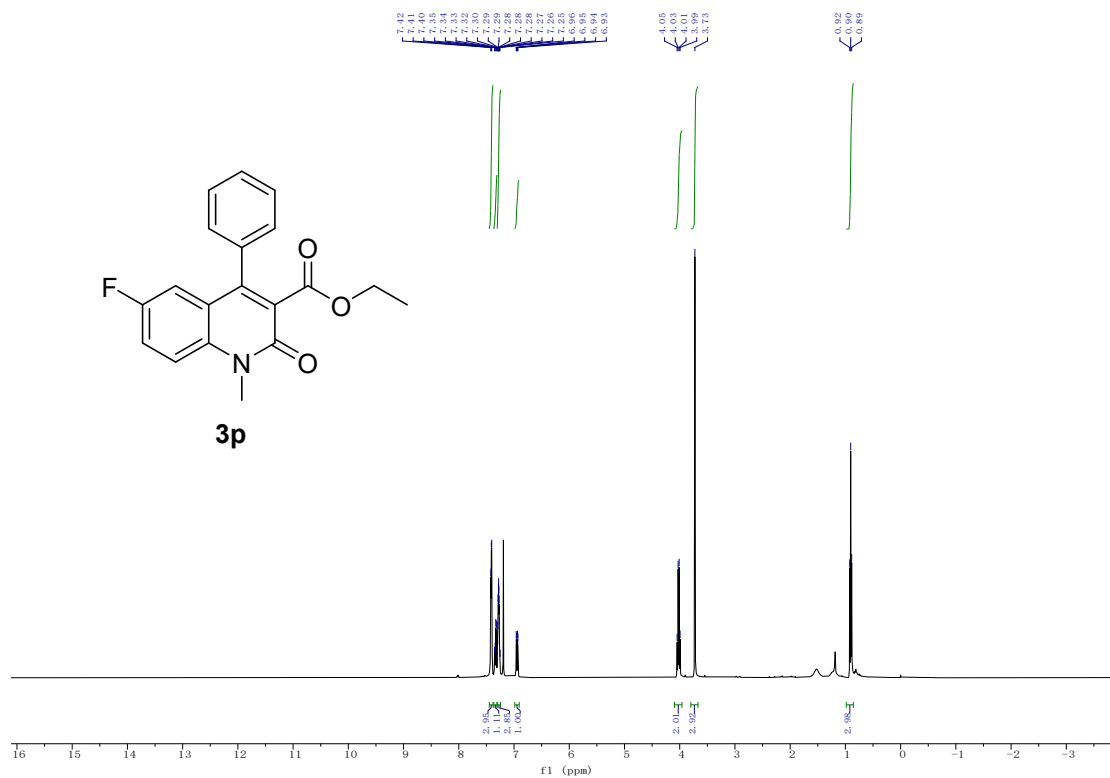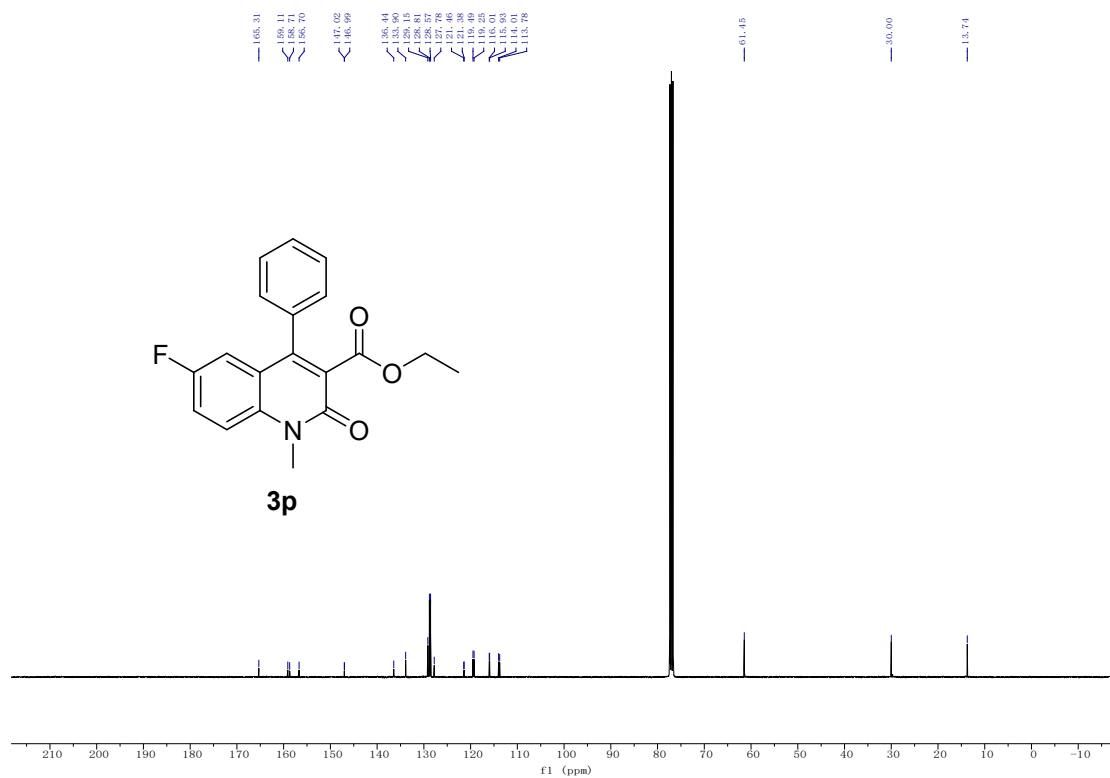



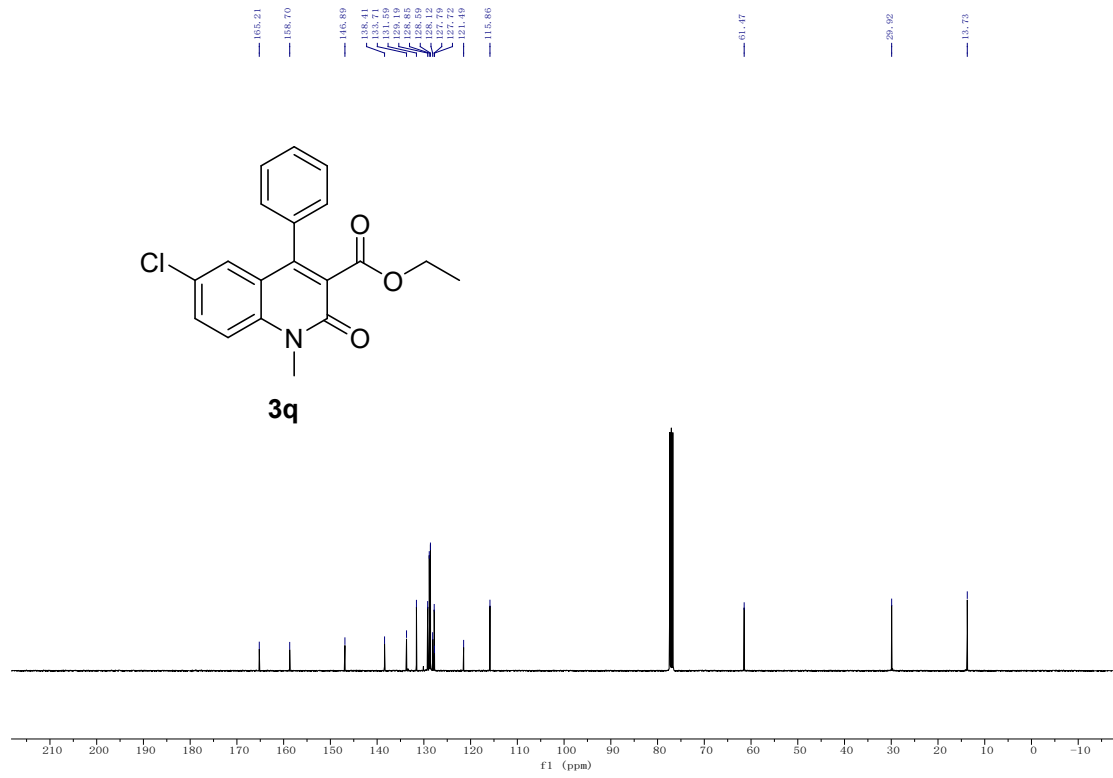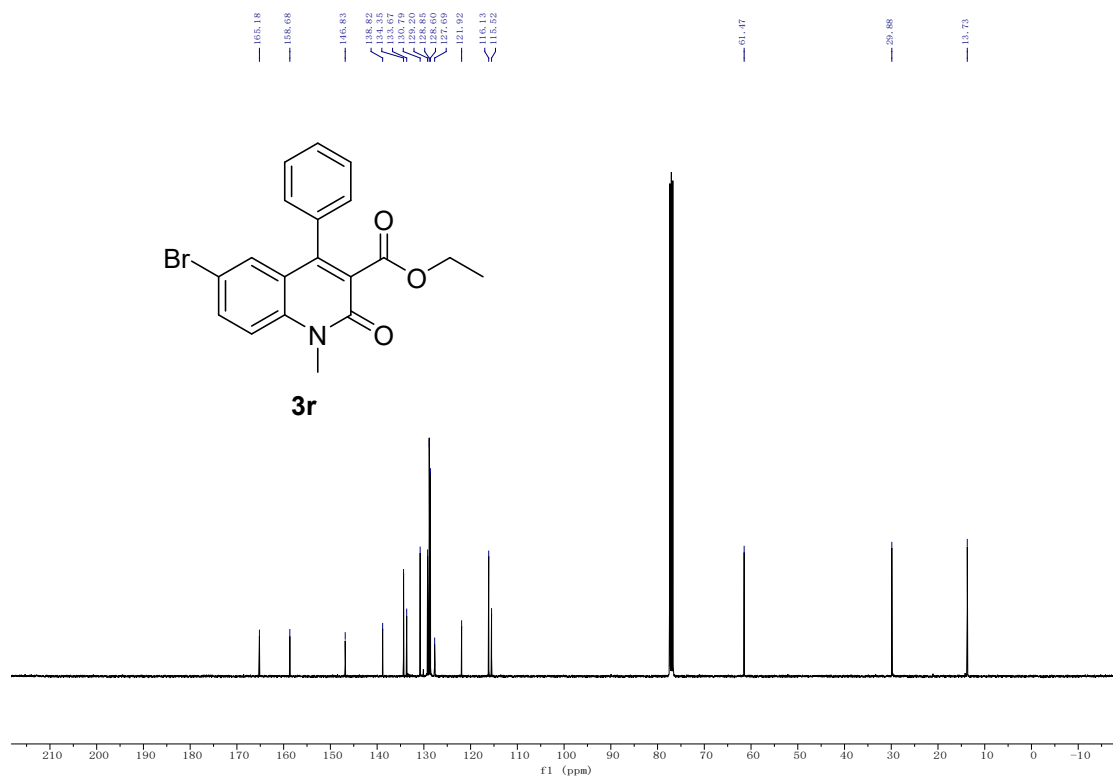

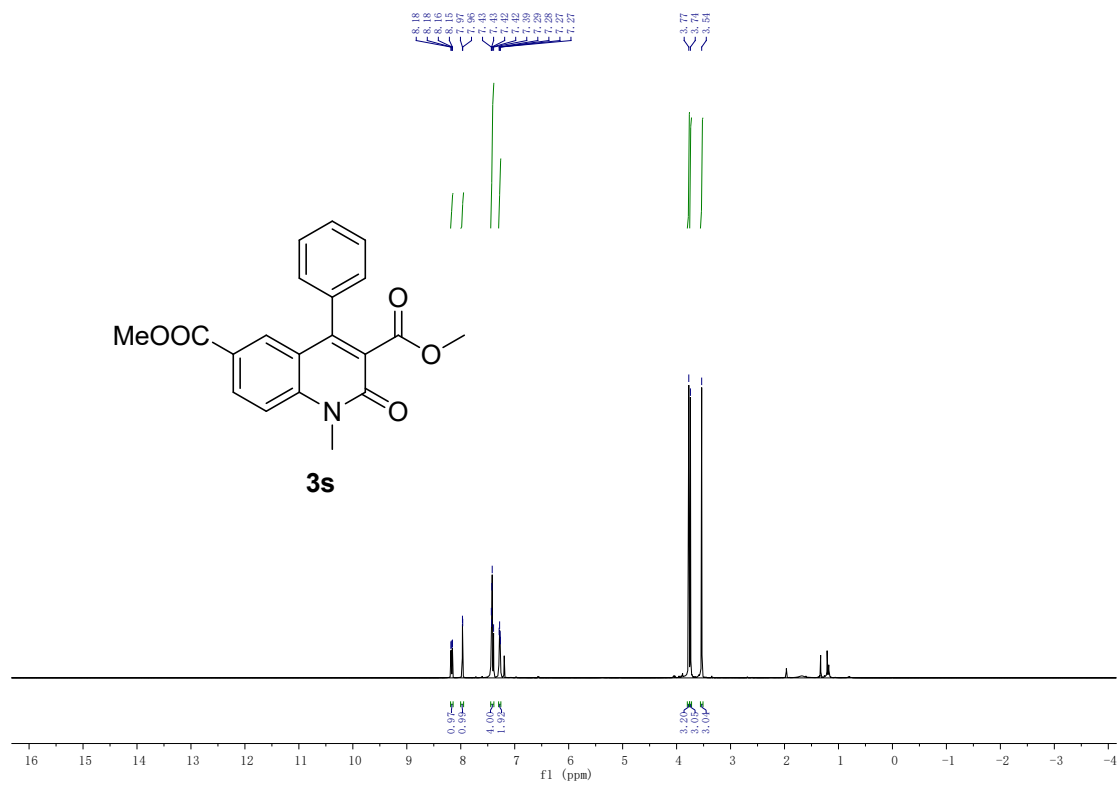

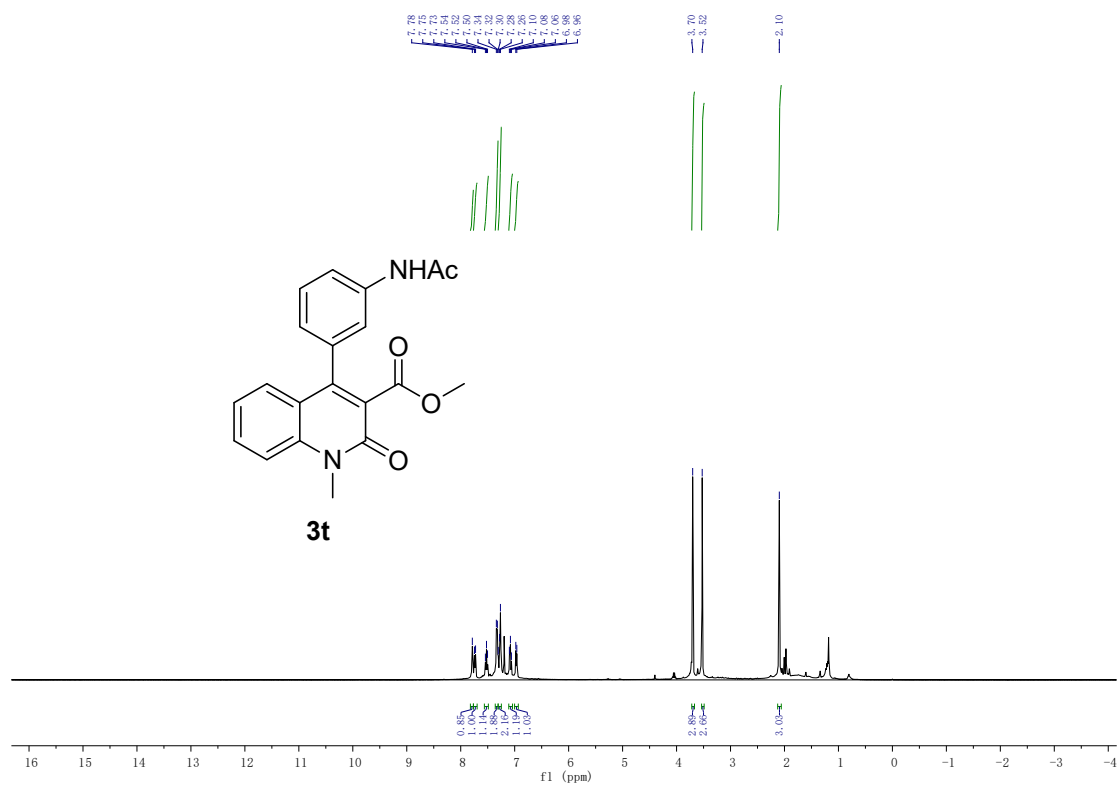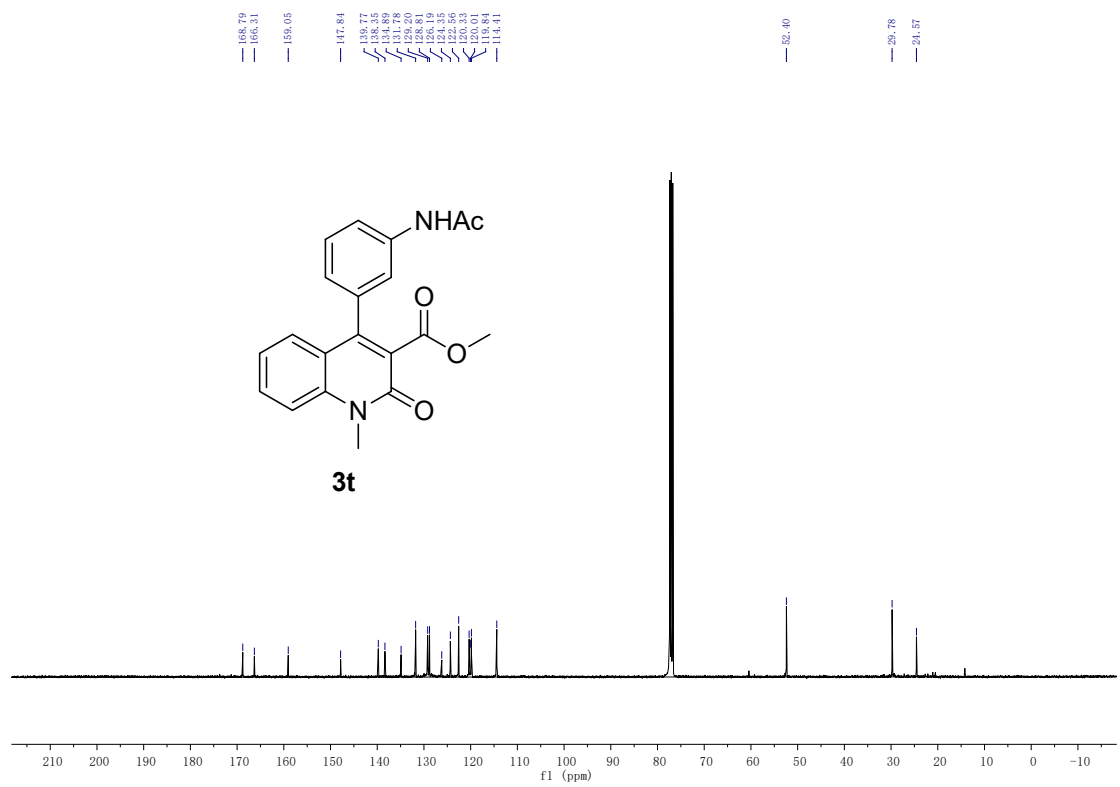

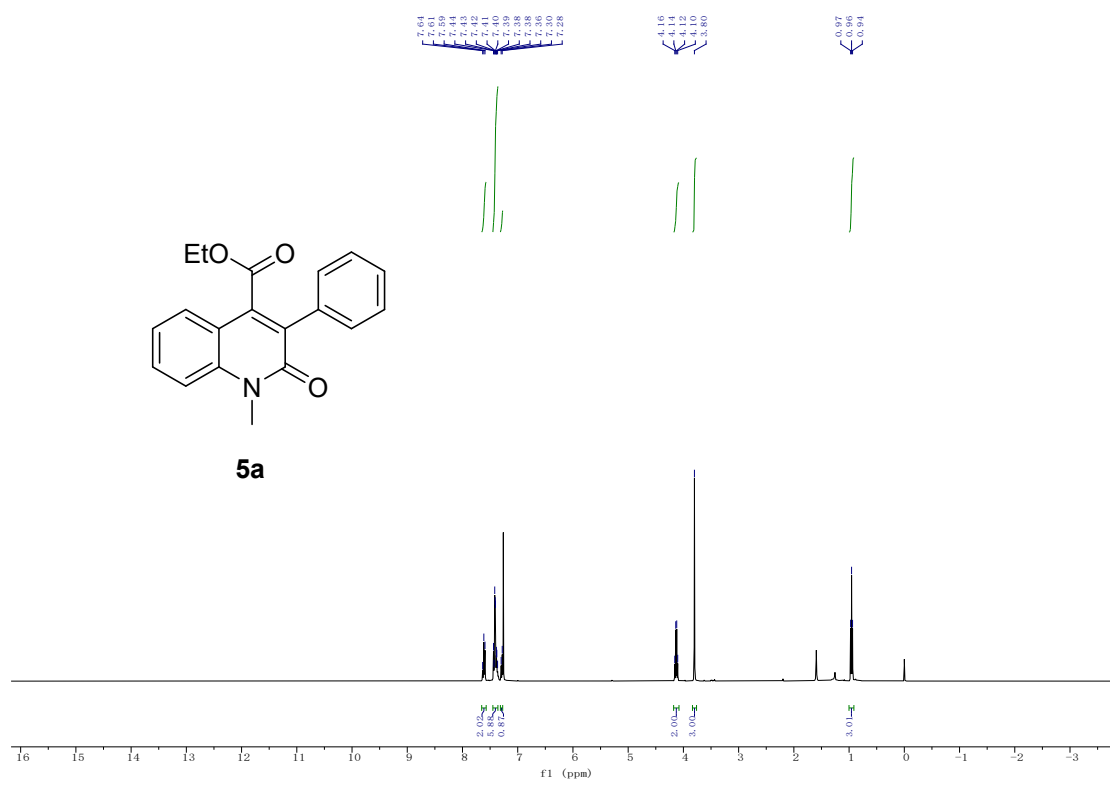

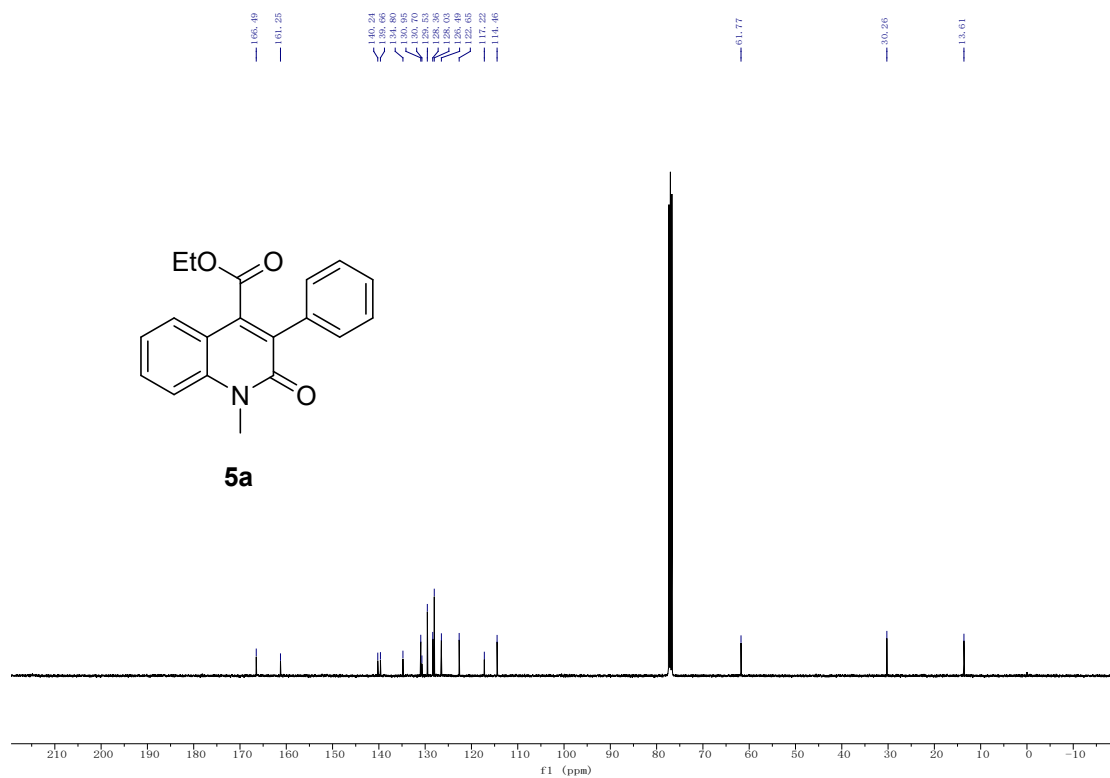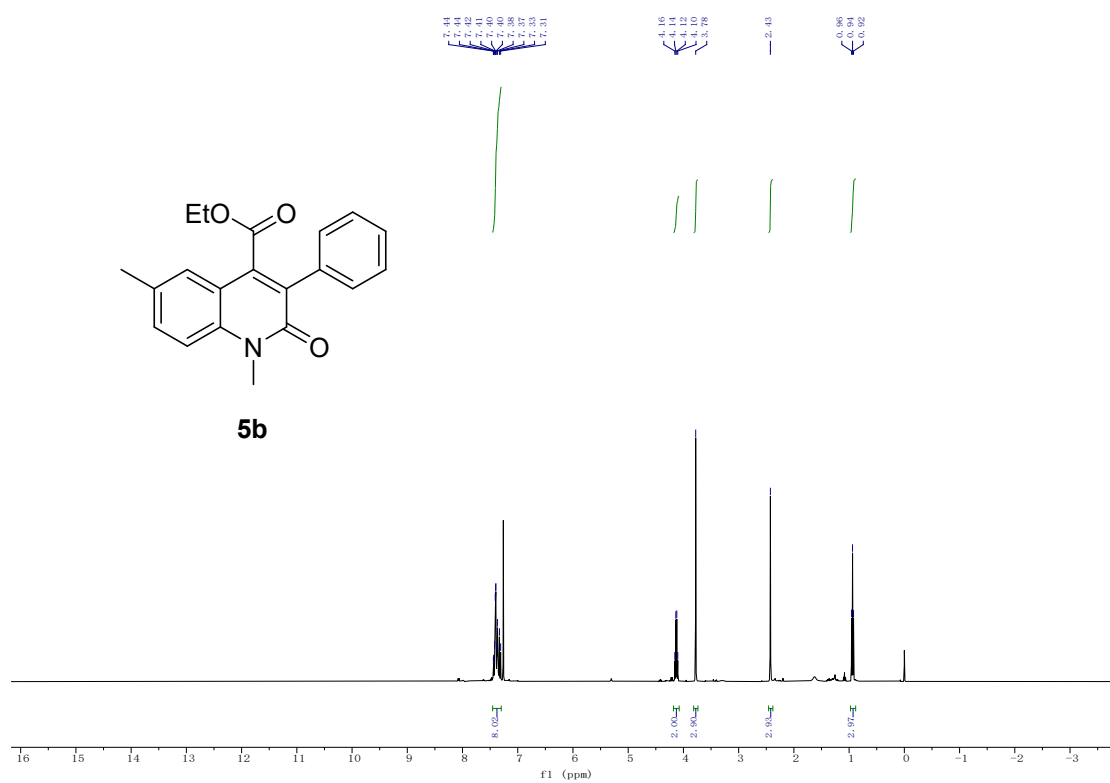



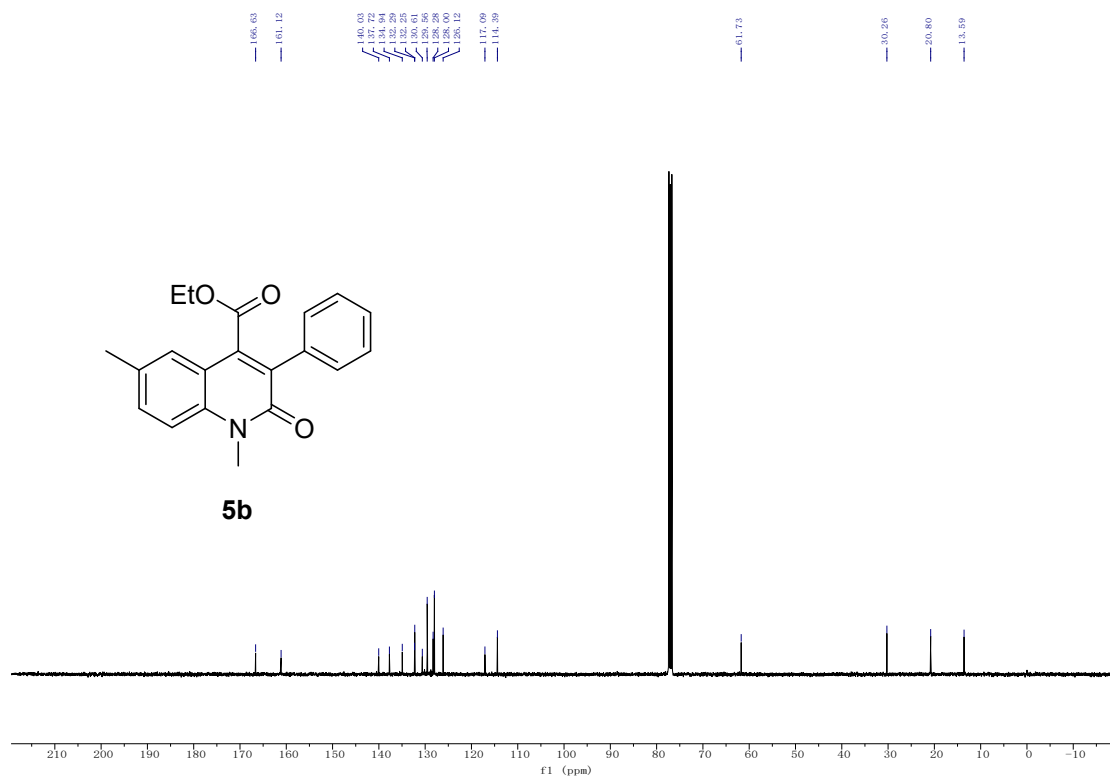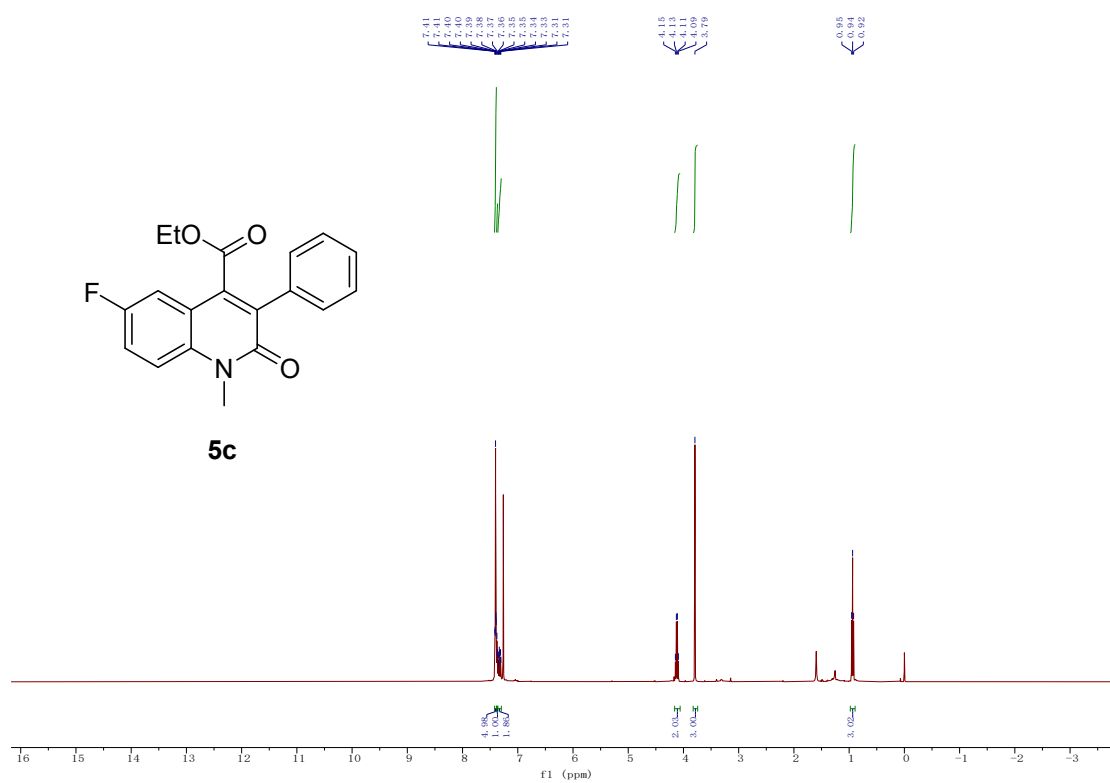

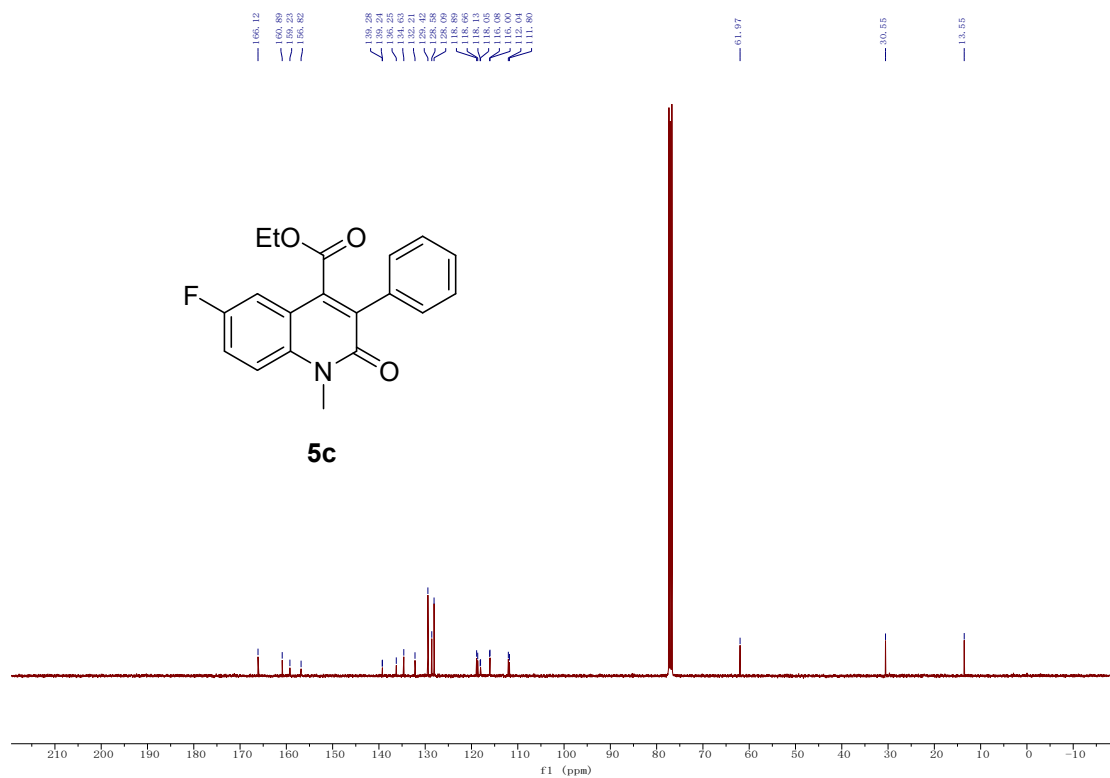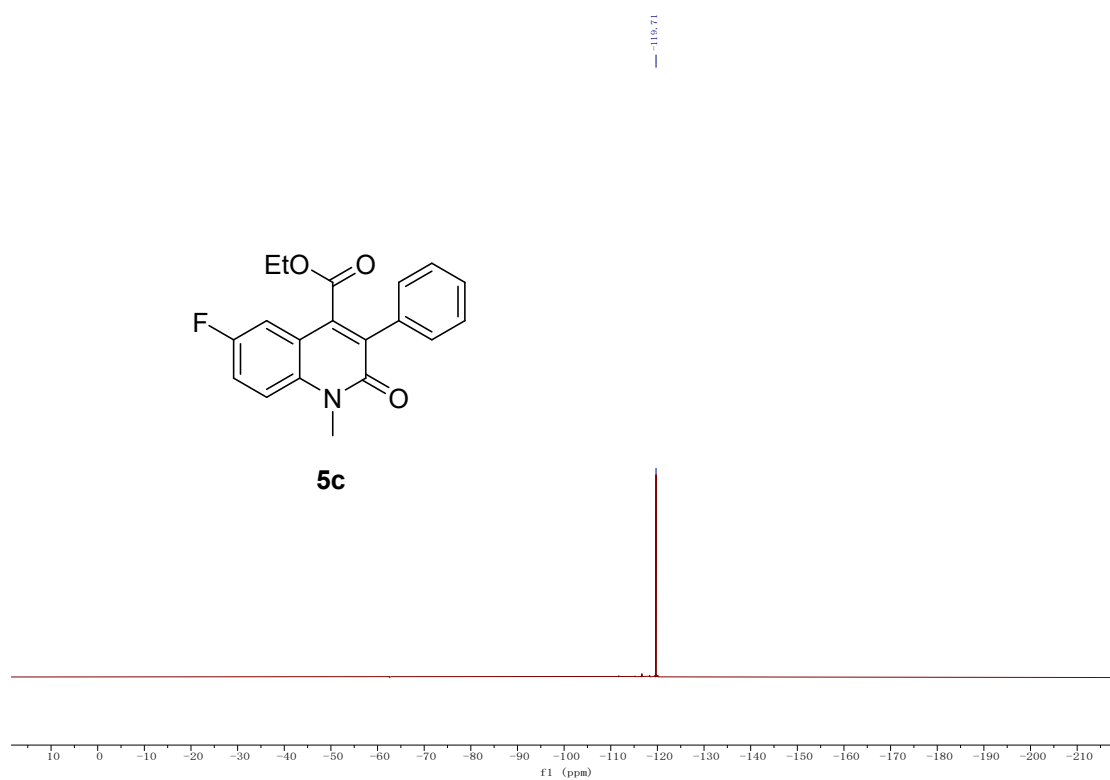

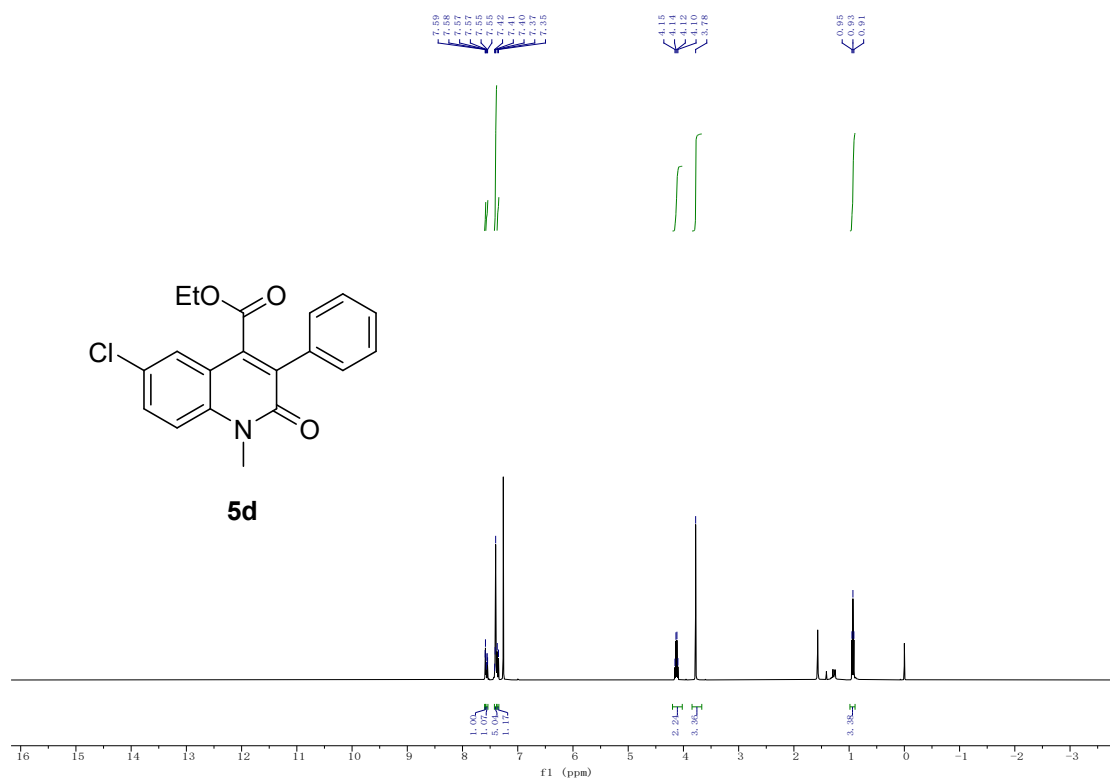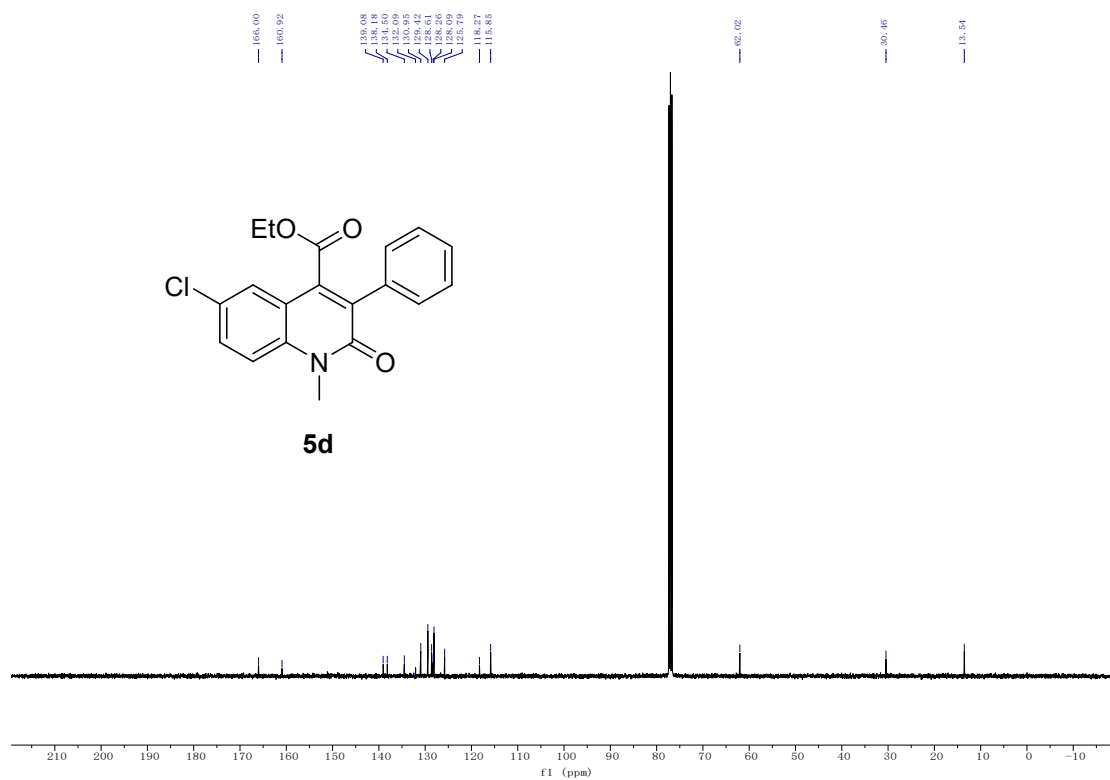

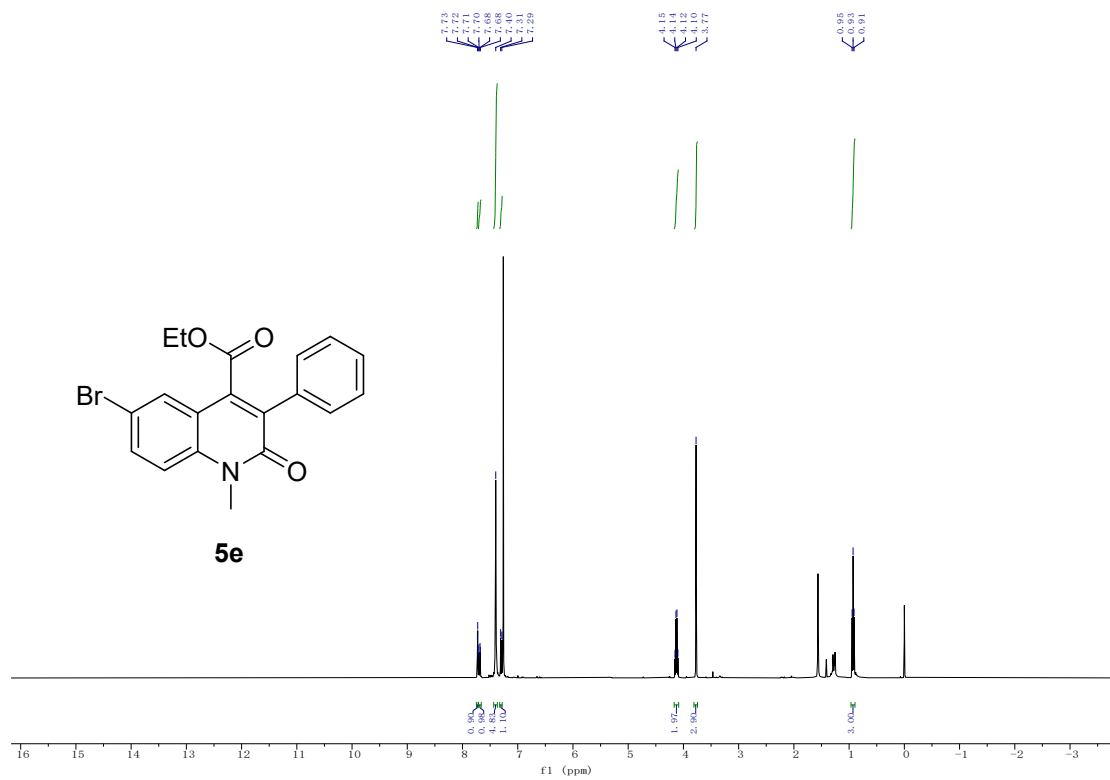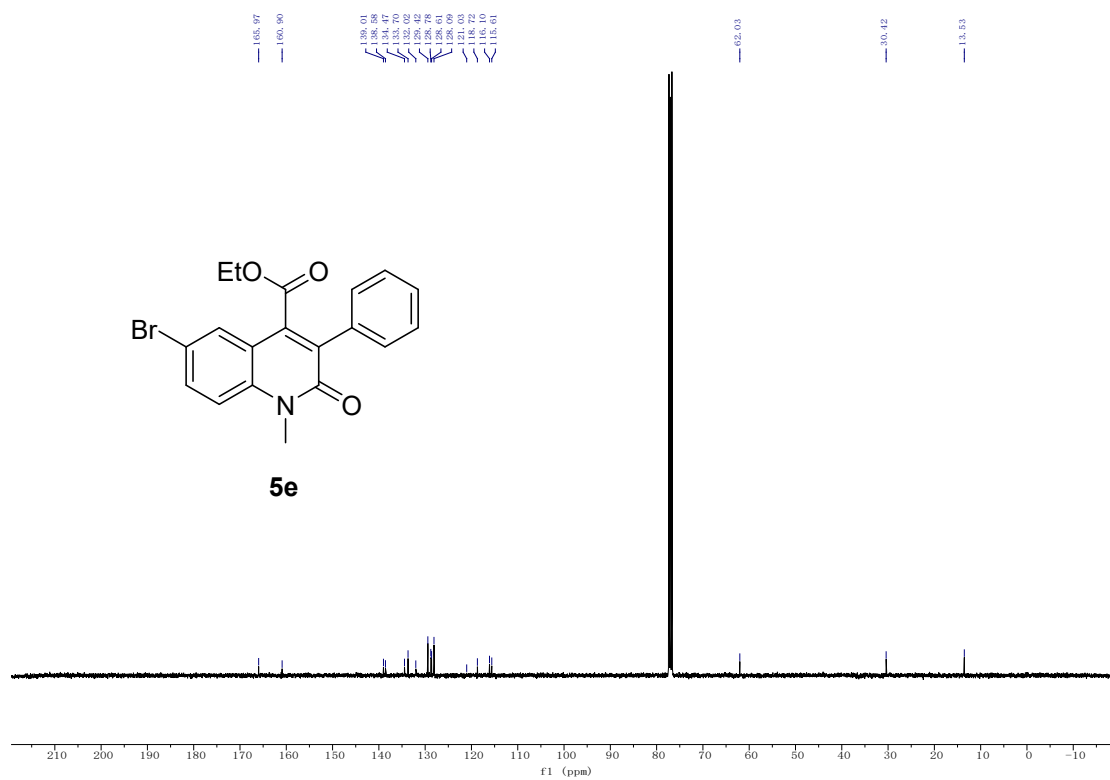

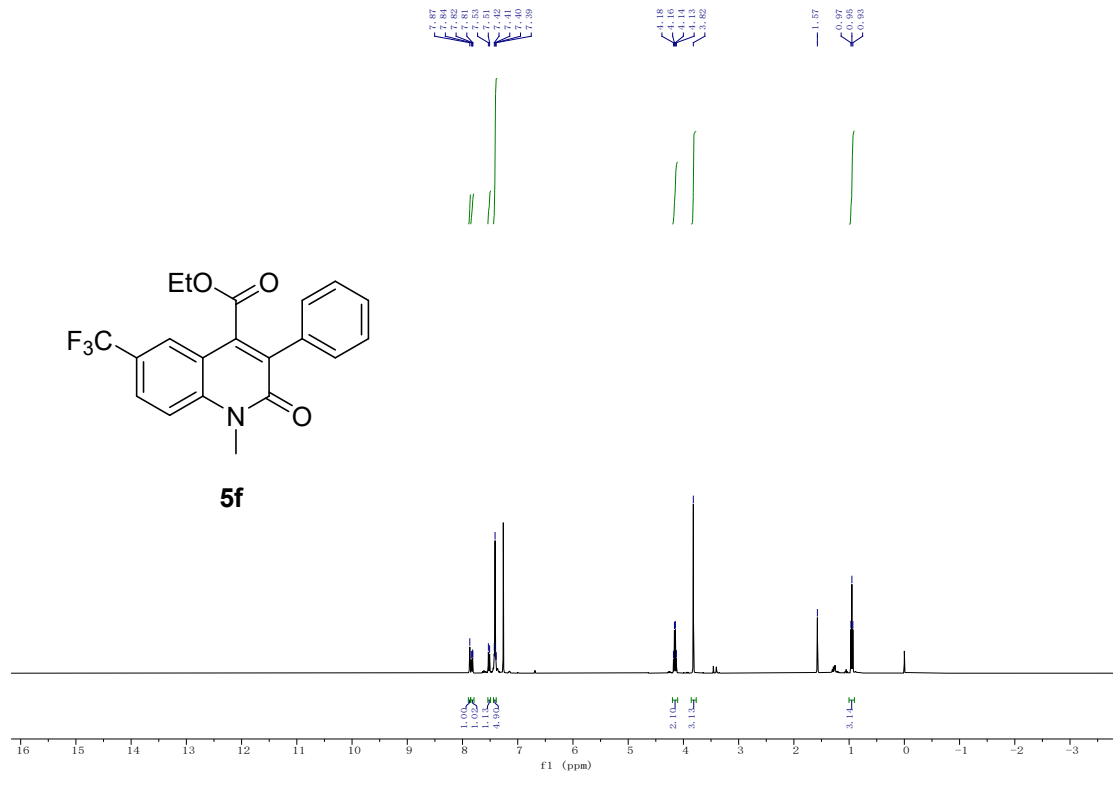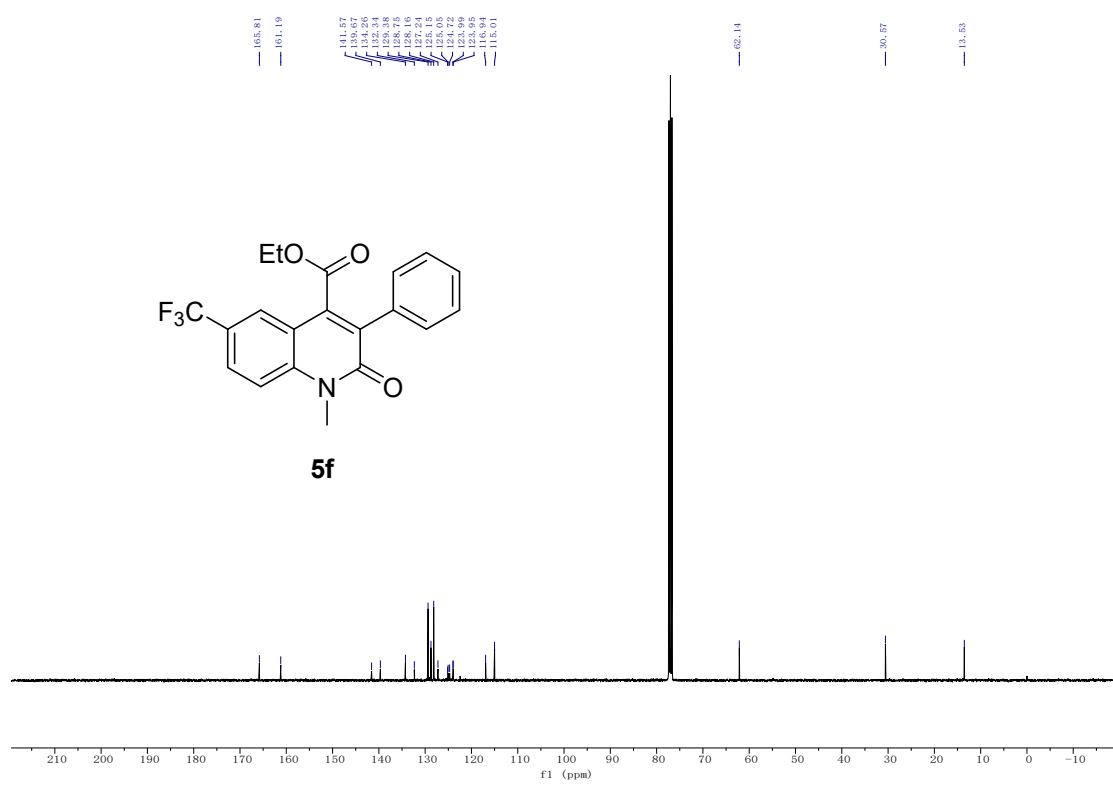

-01.965

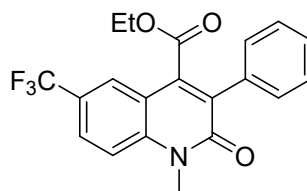

**5f**

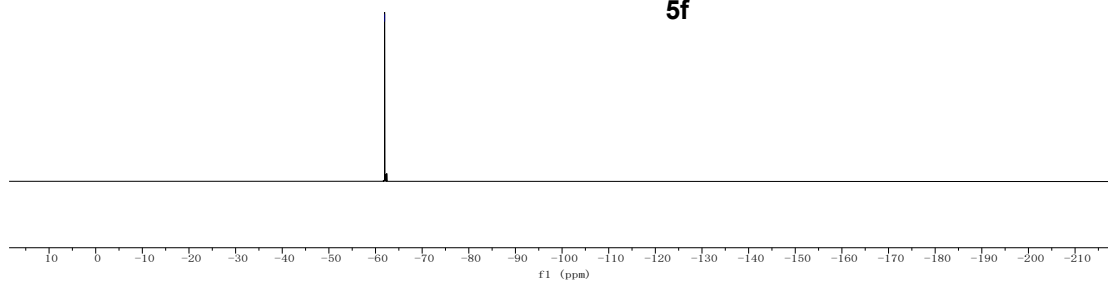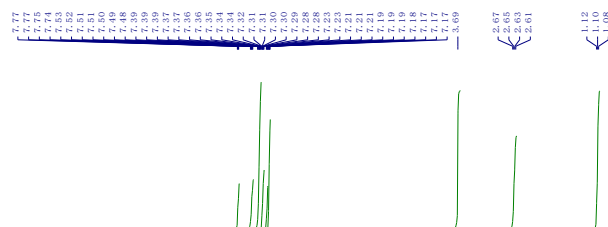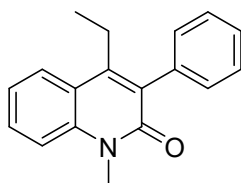

**5g**

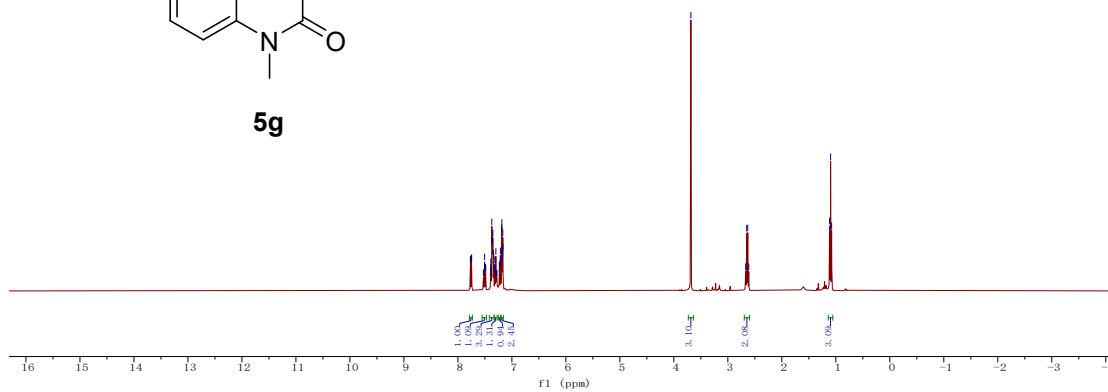

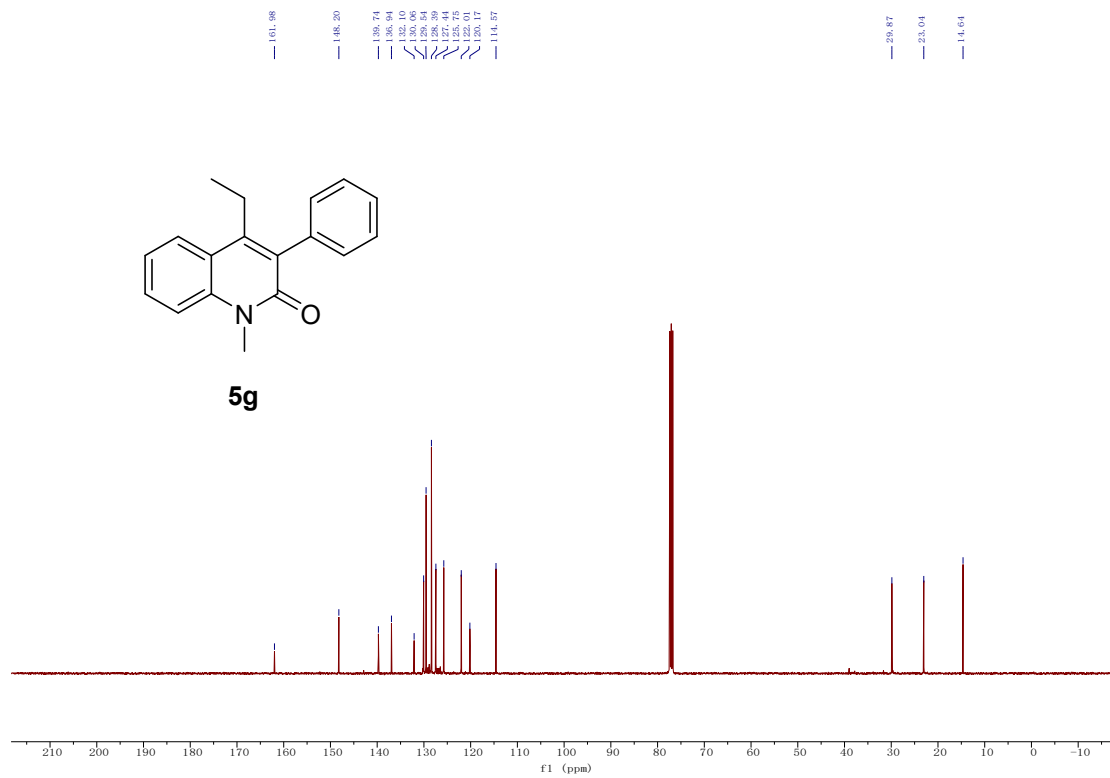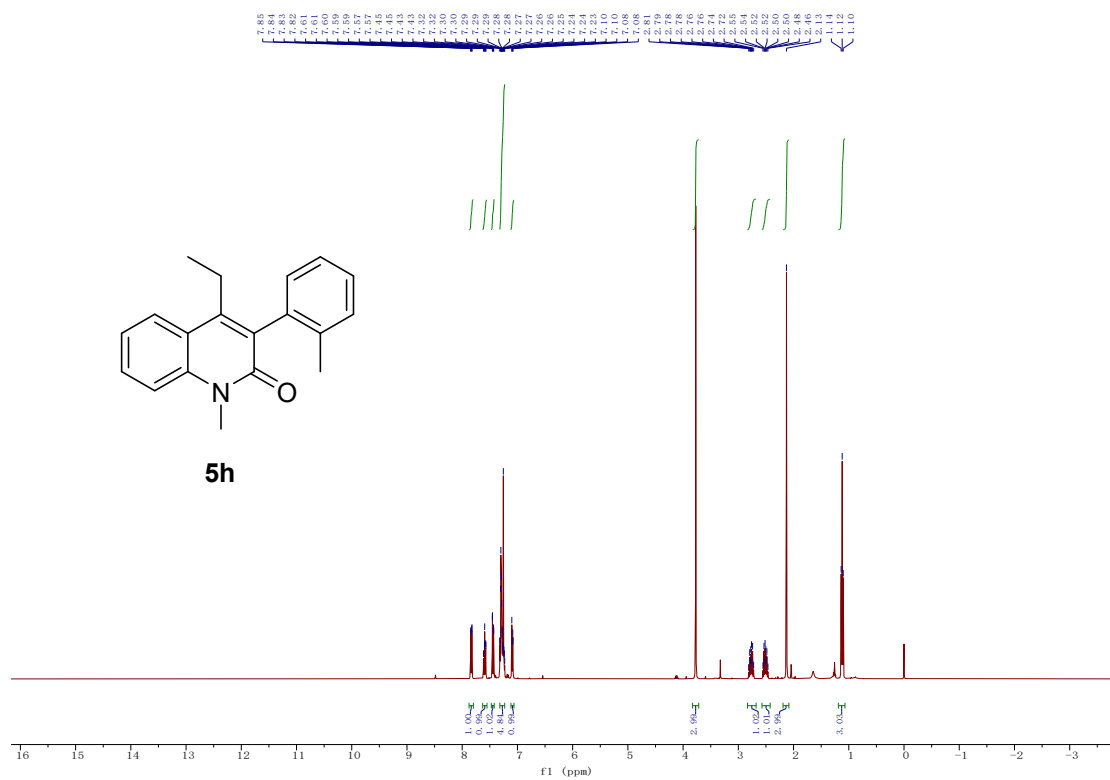

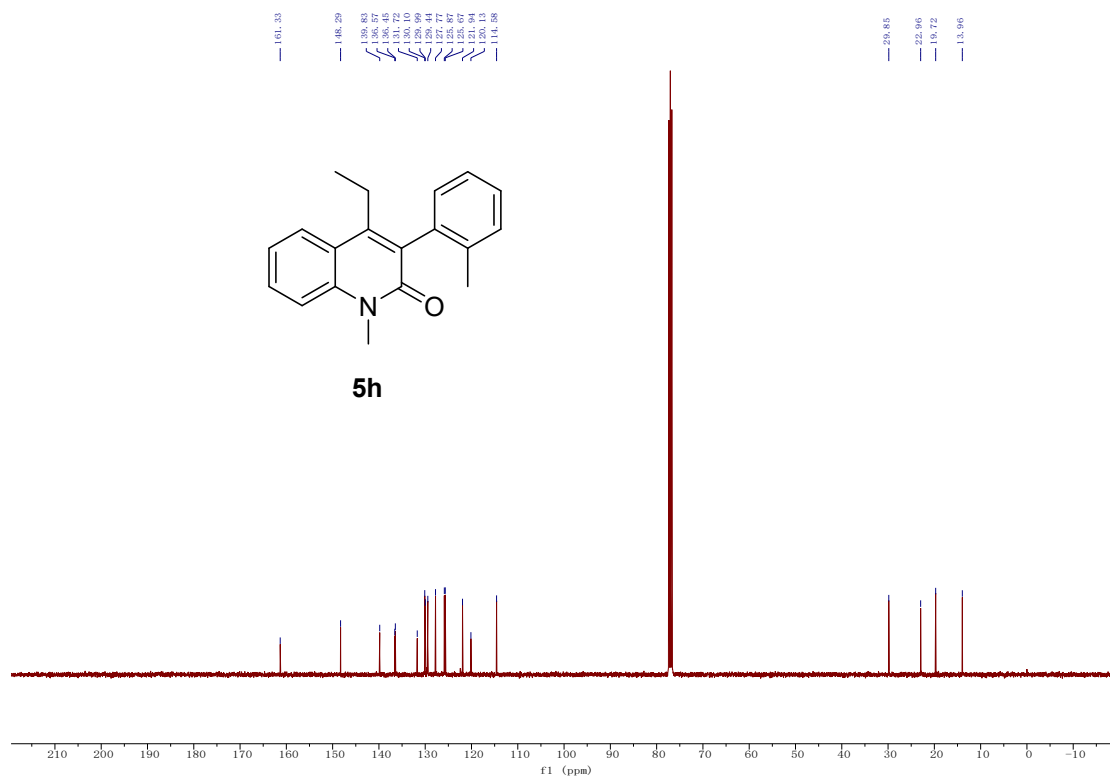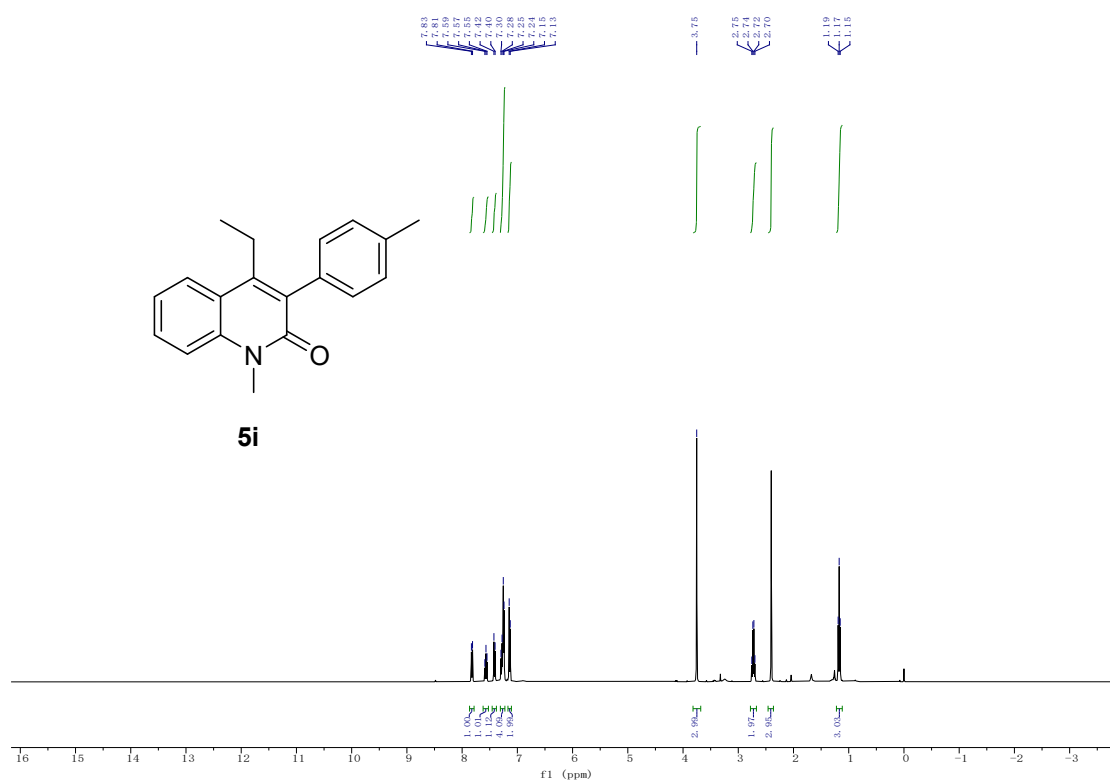



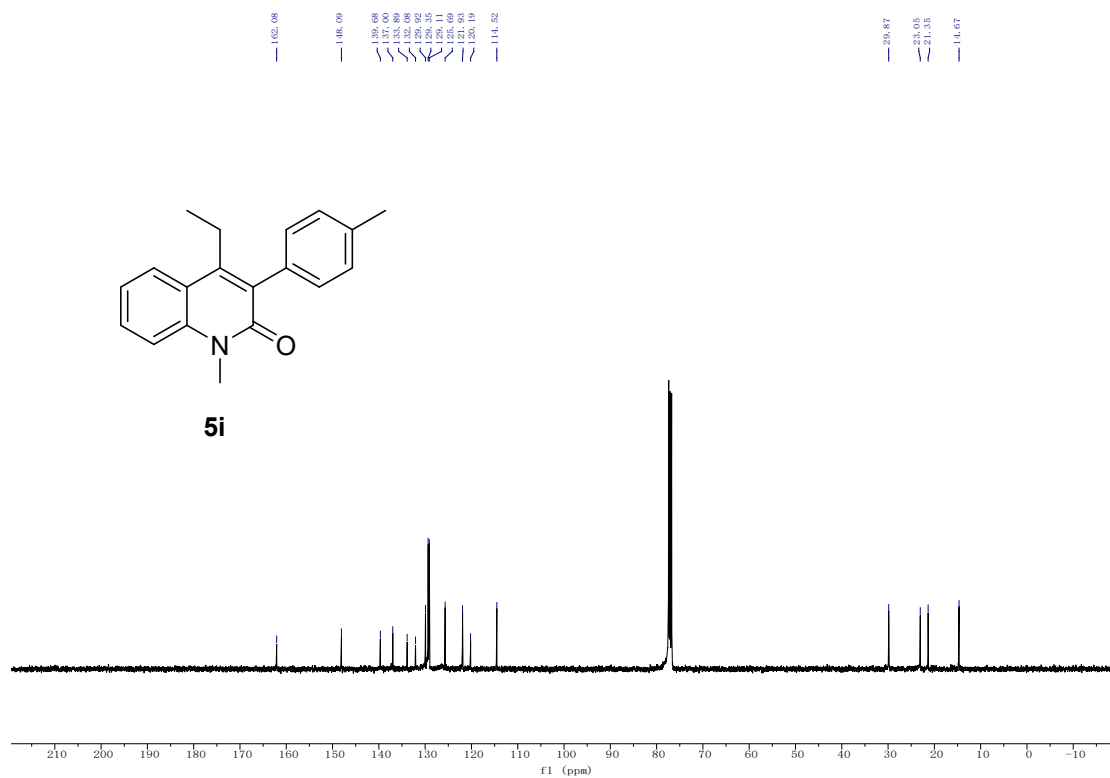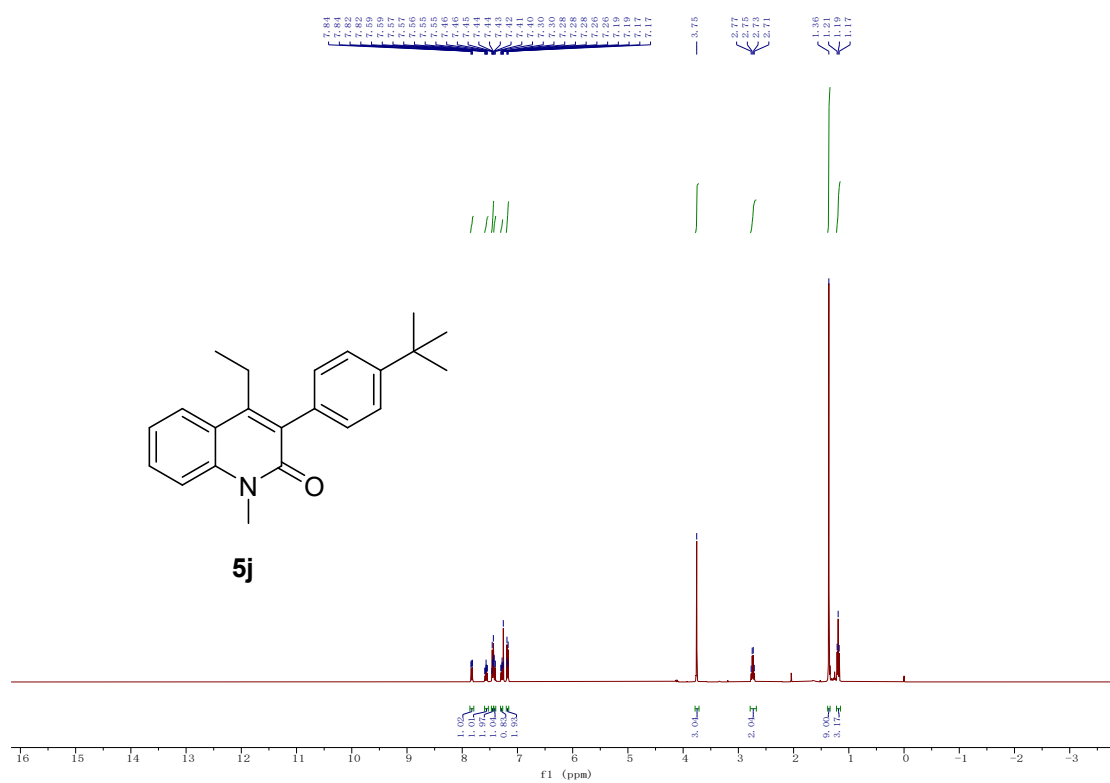

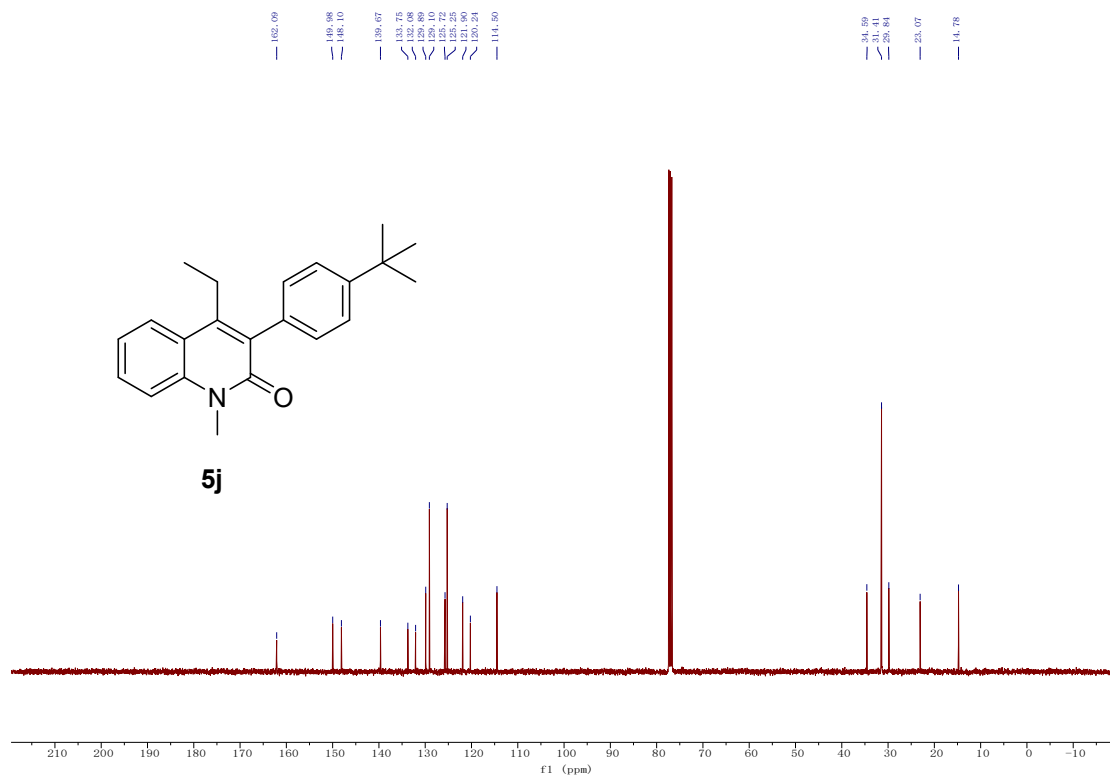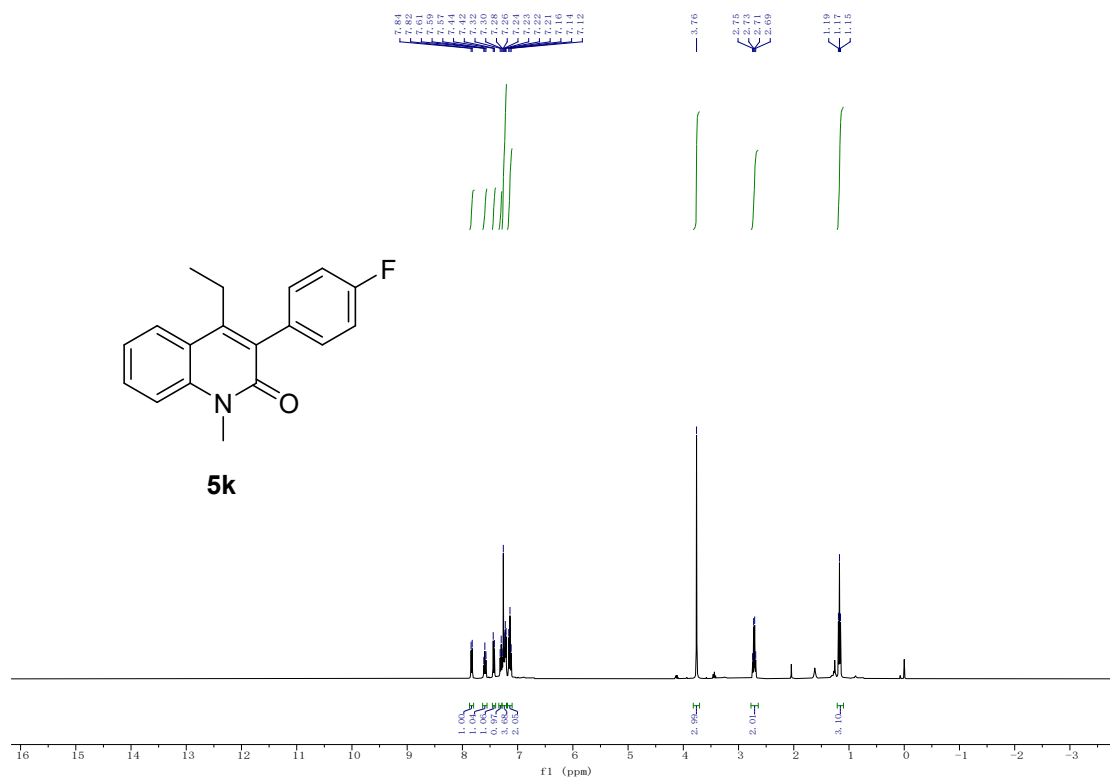

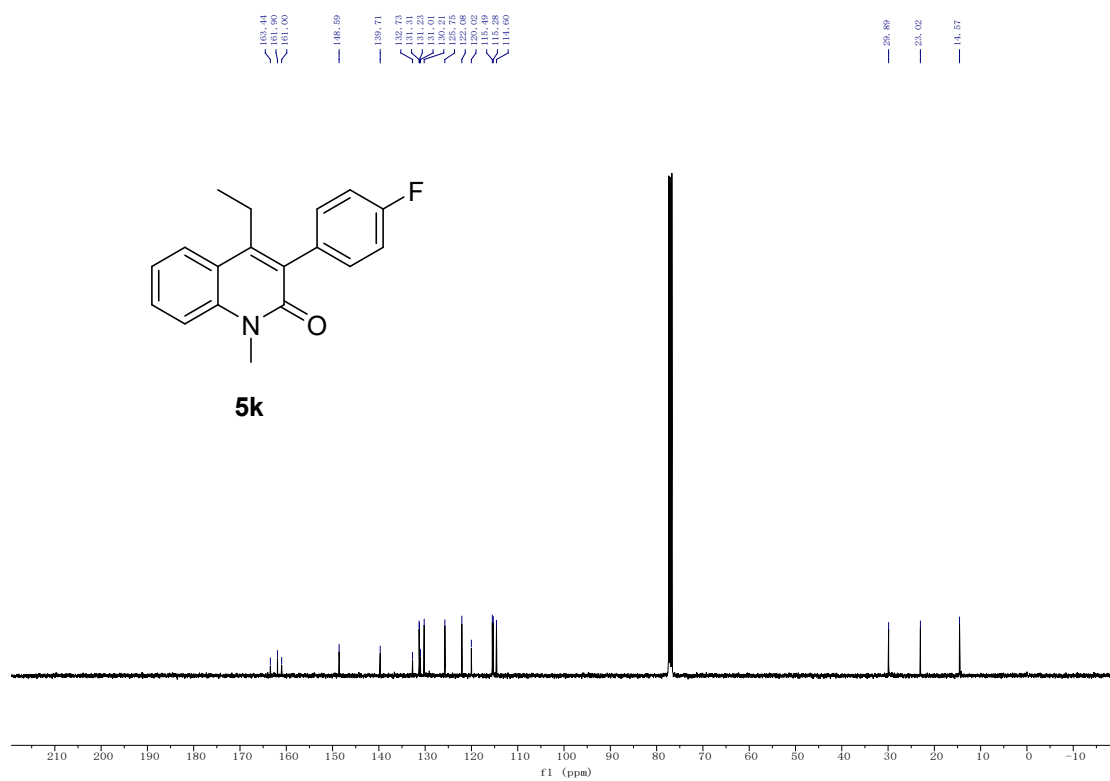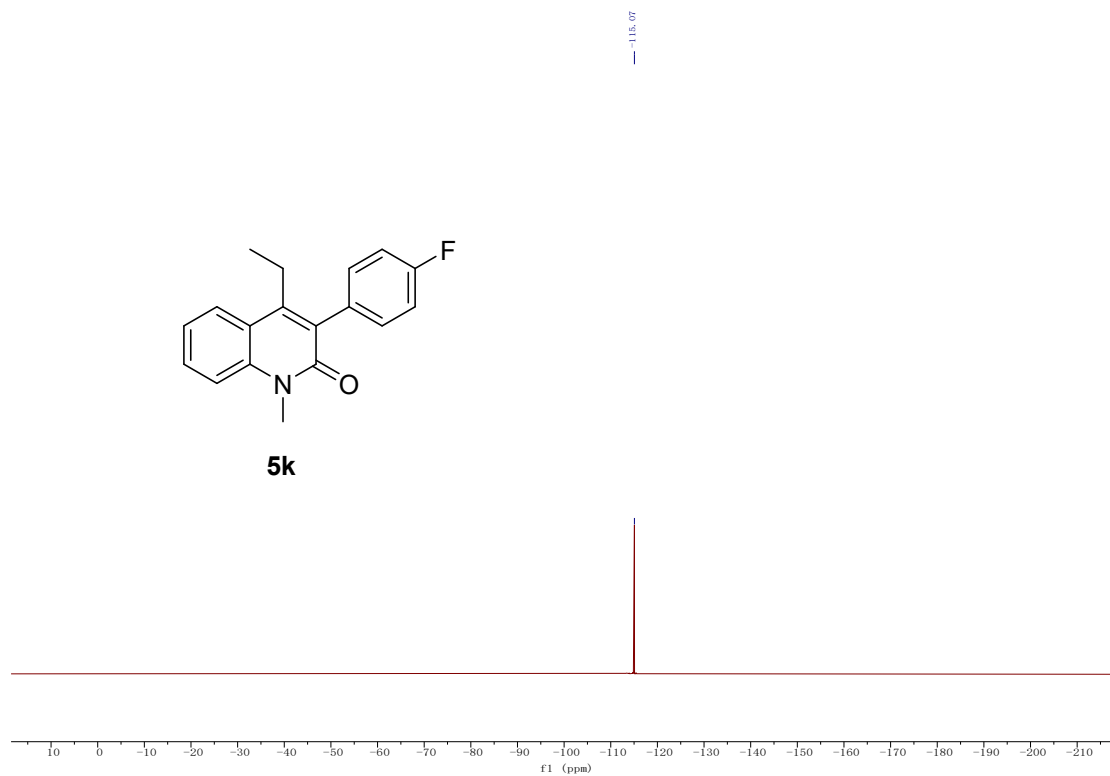

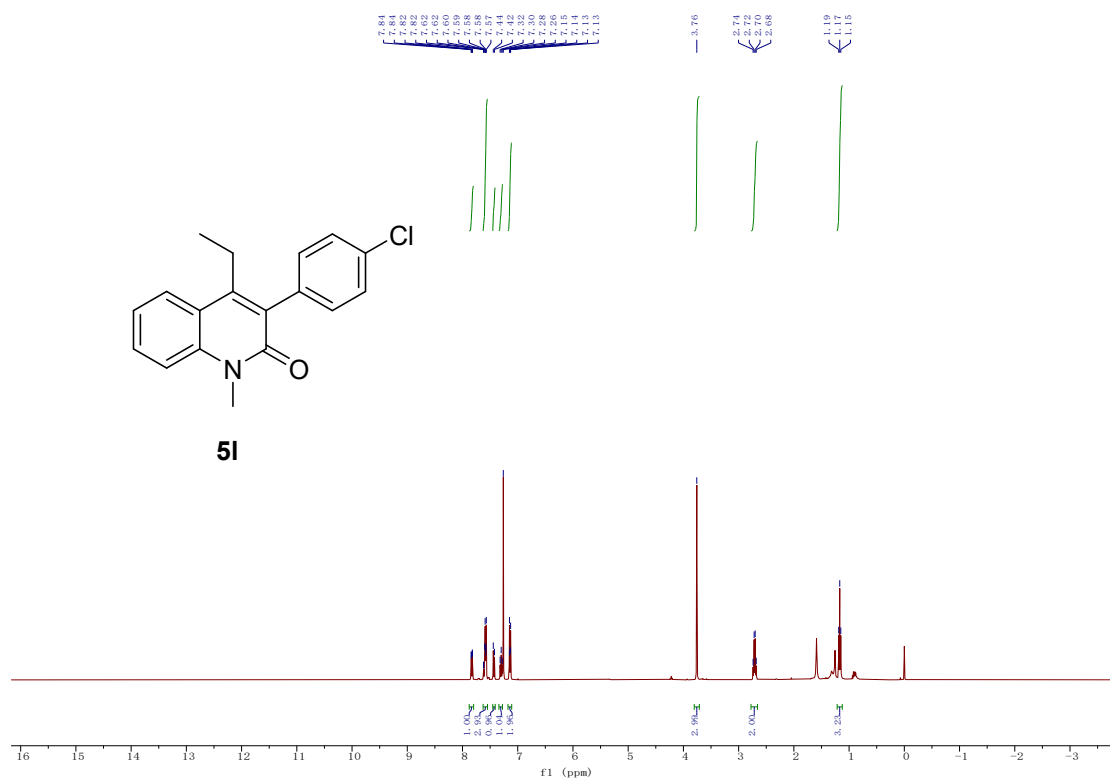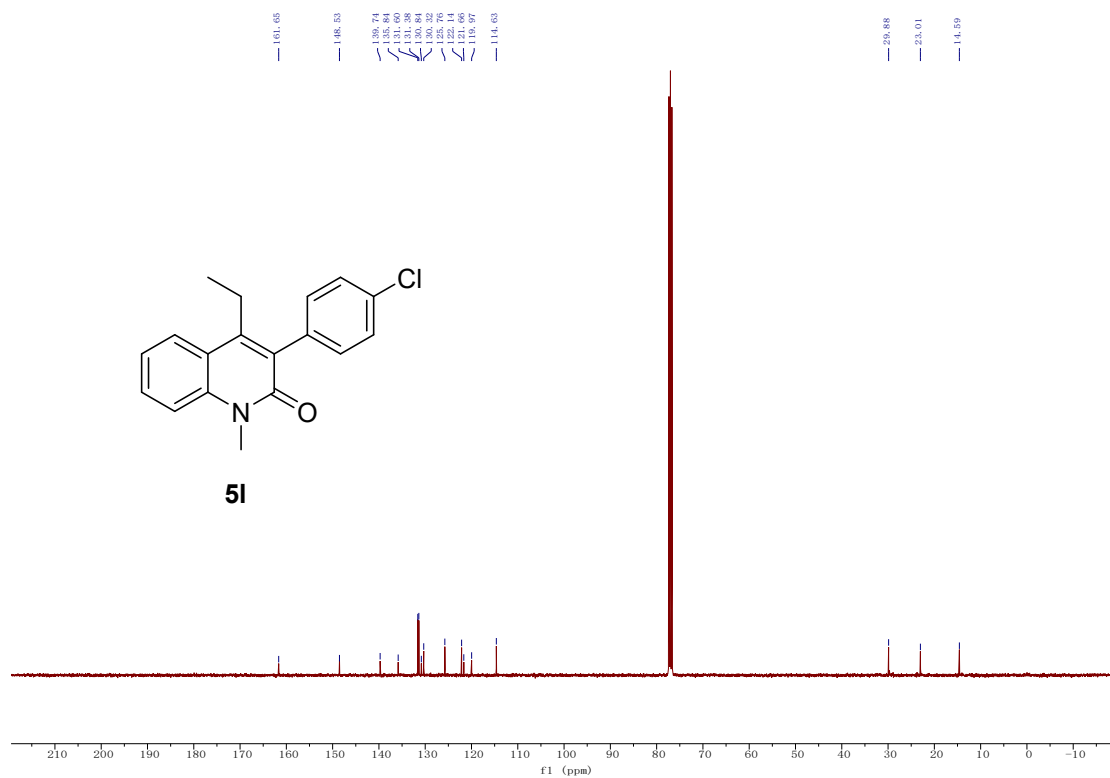

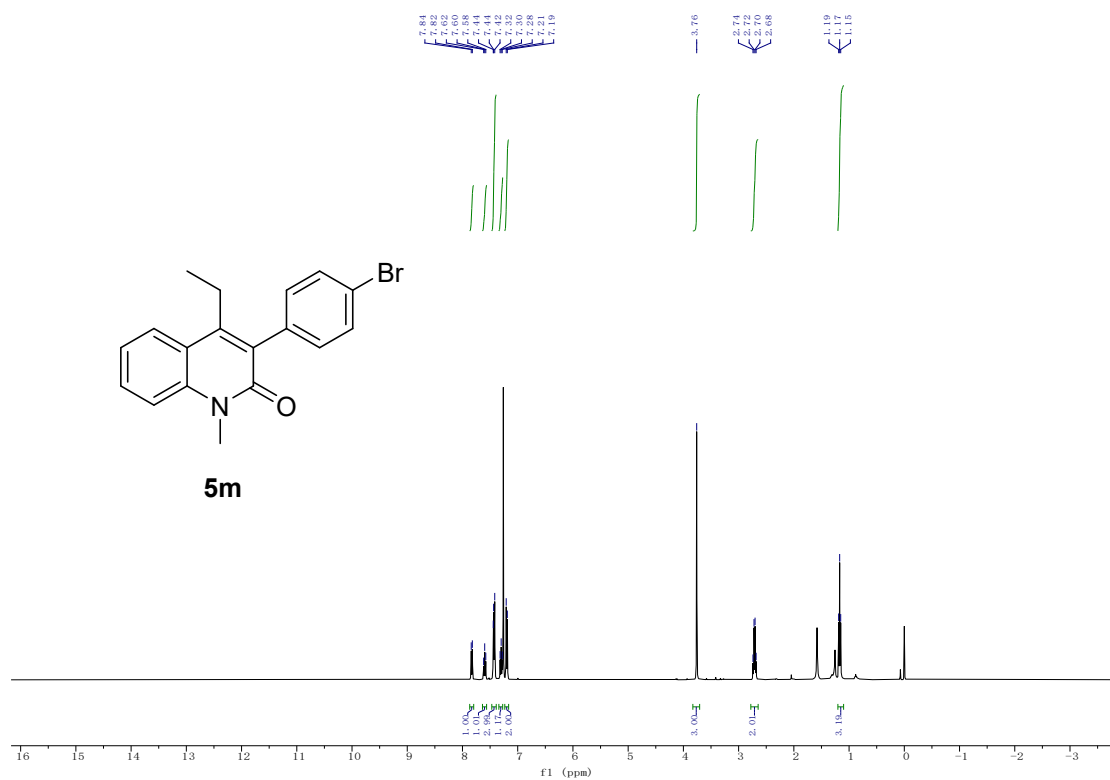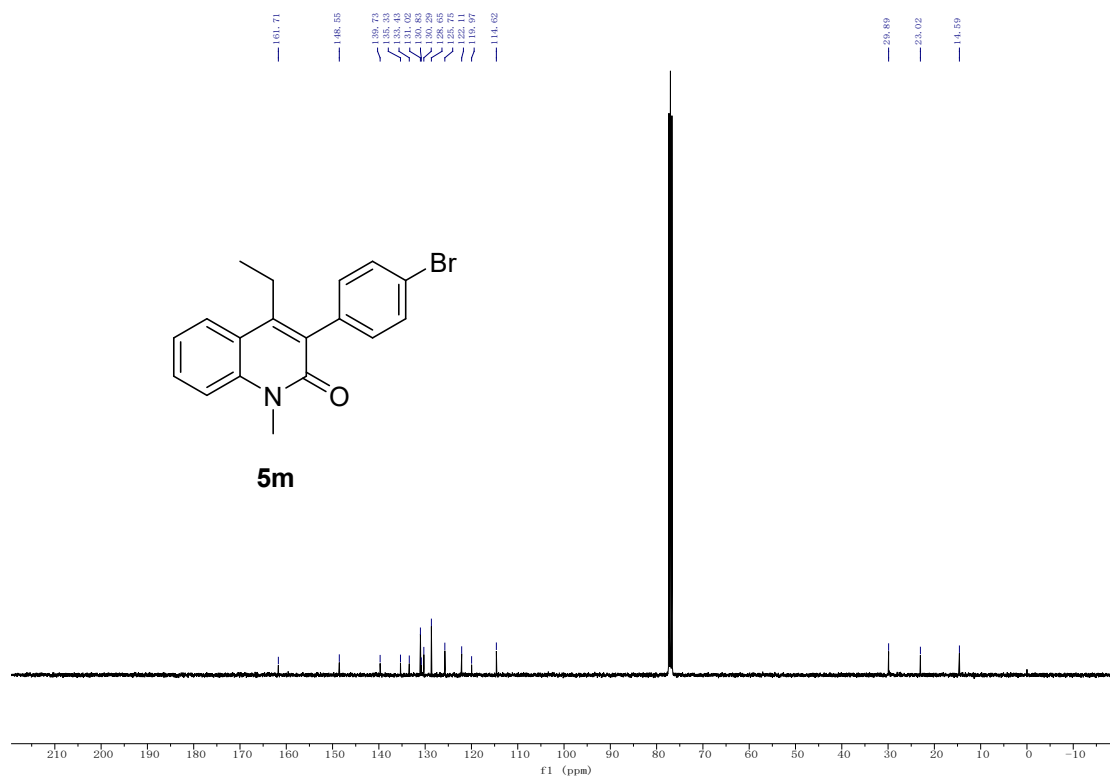

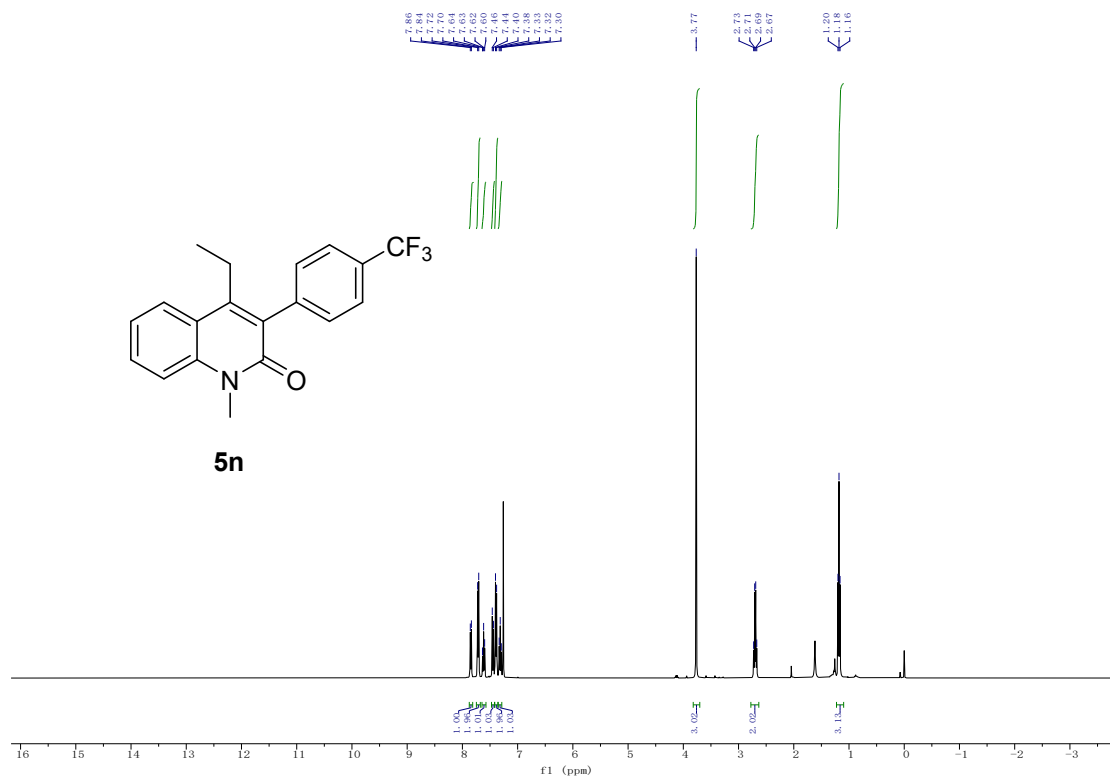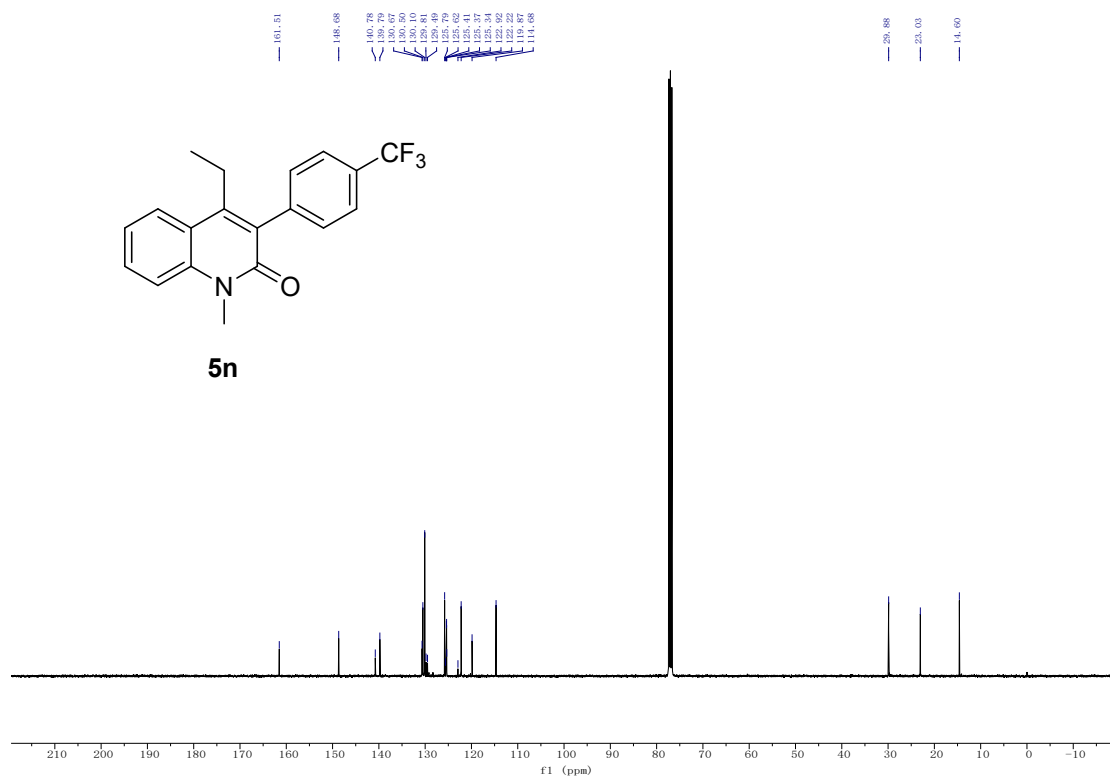

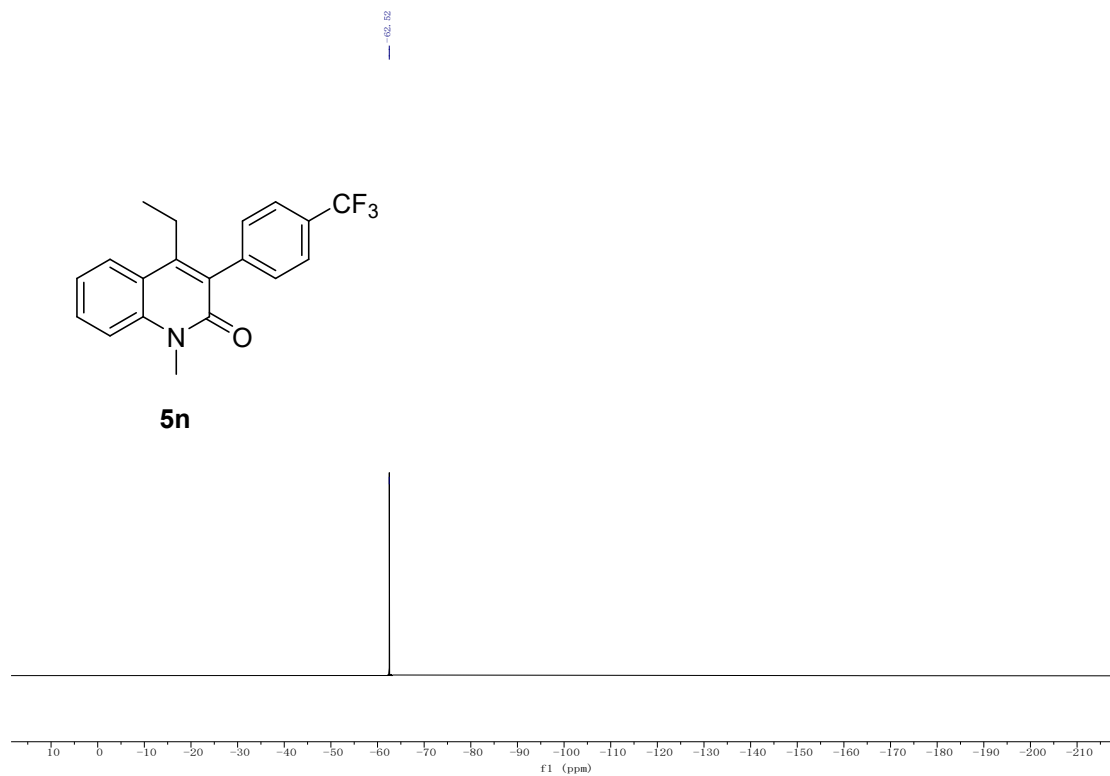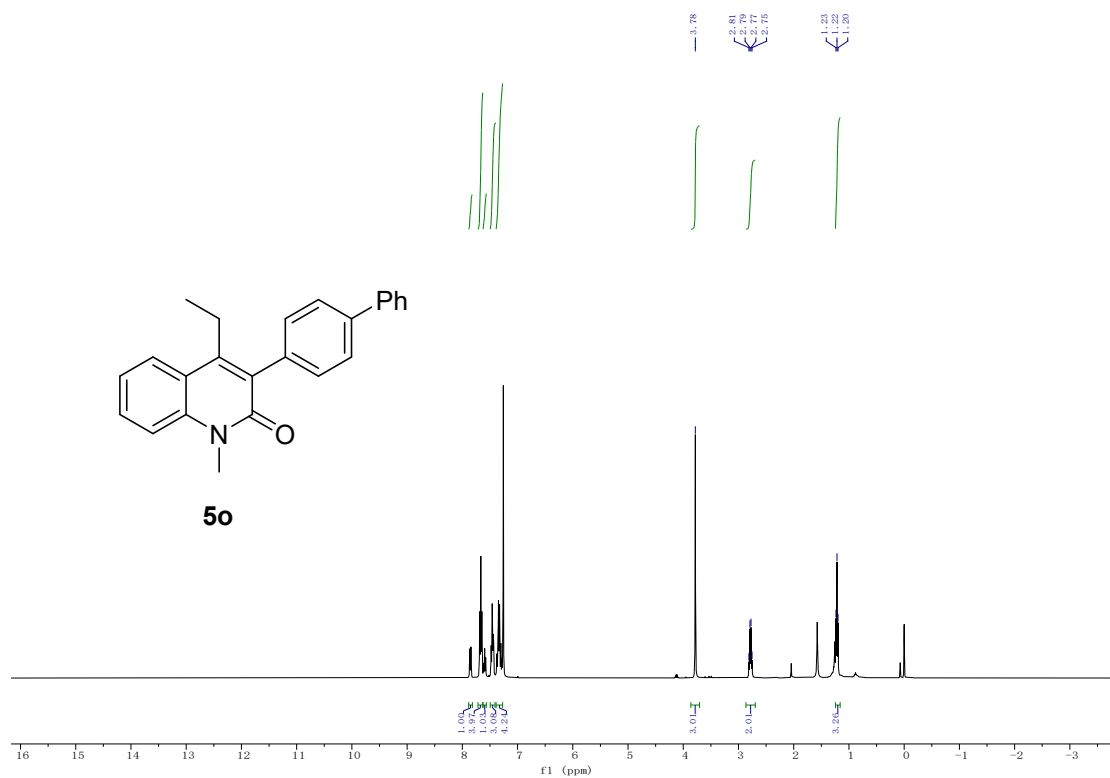

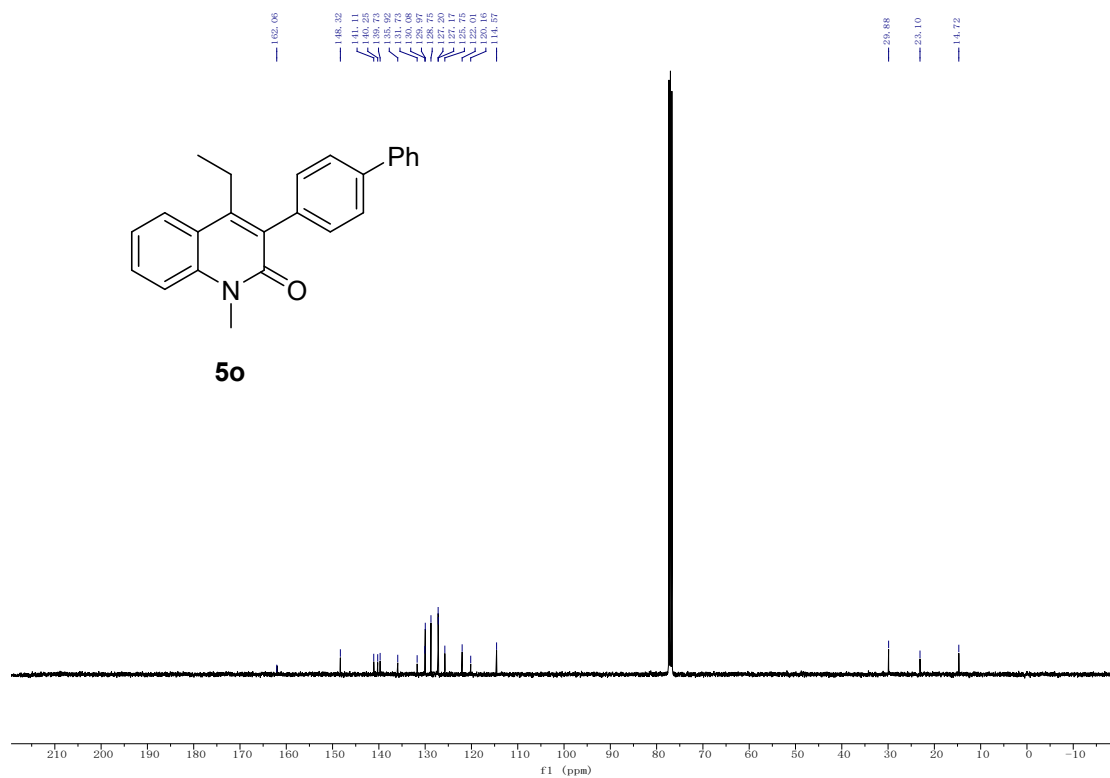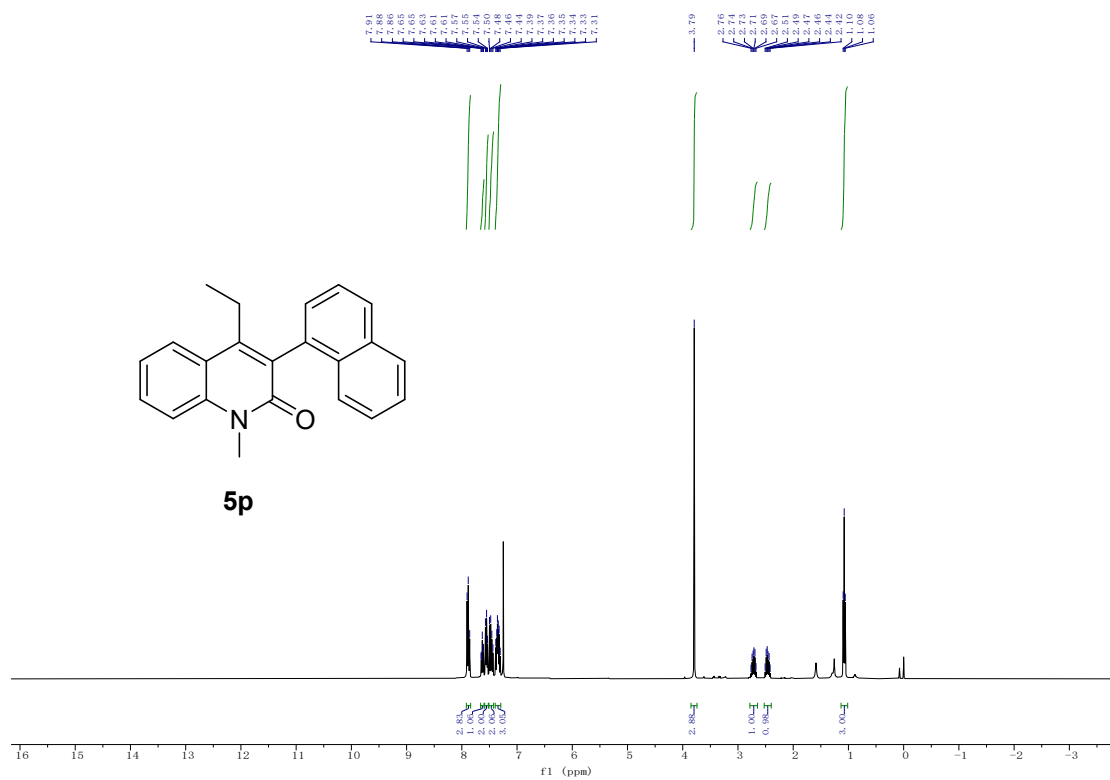





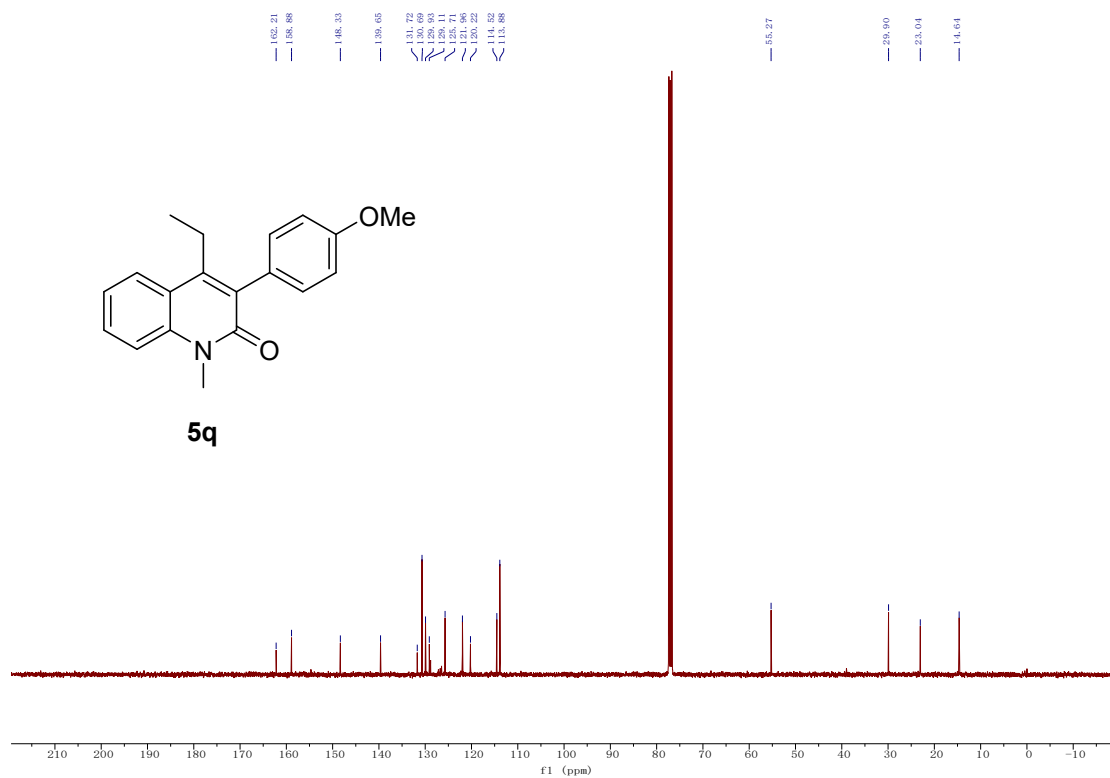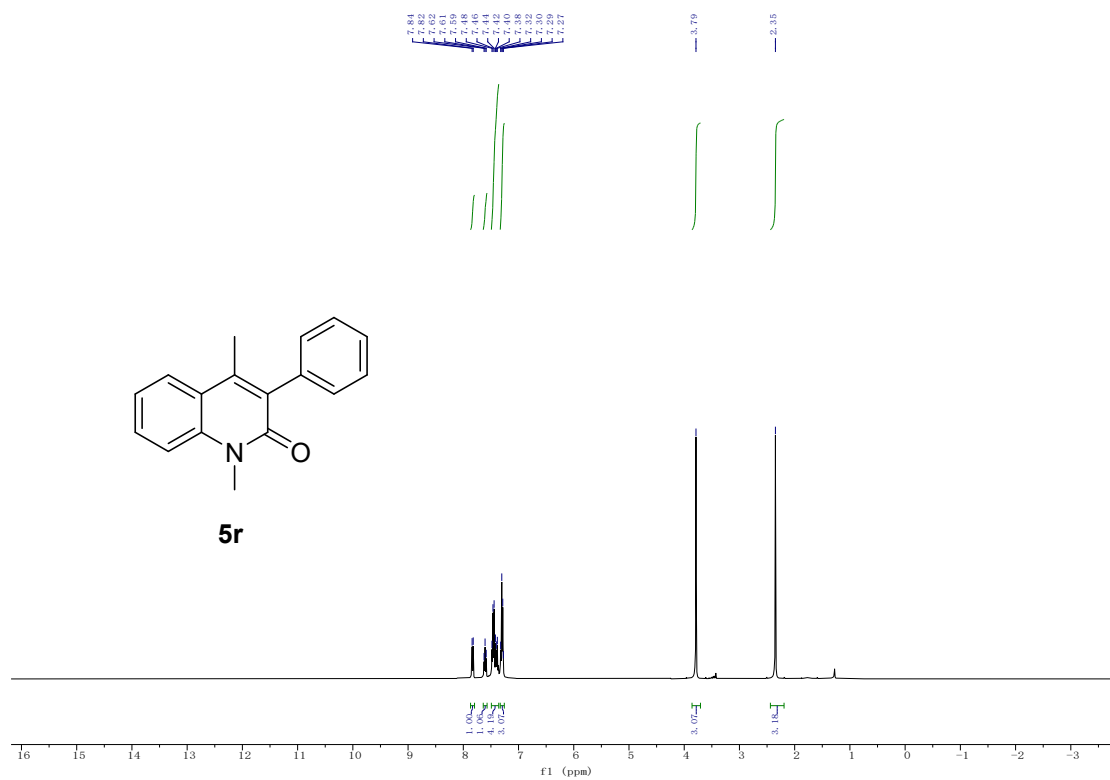

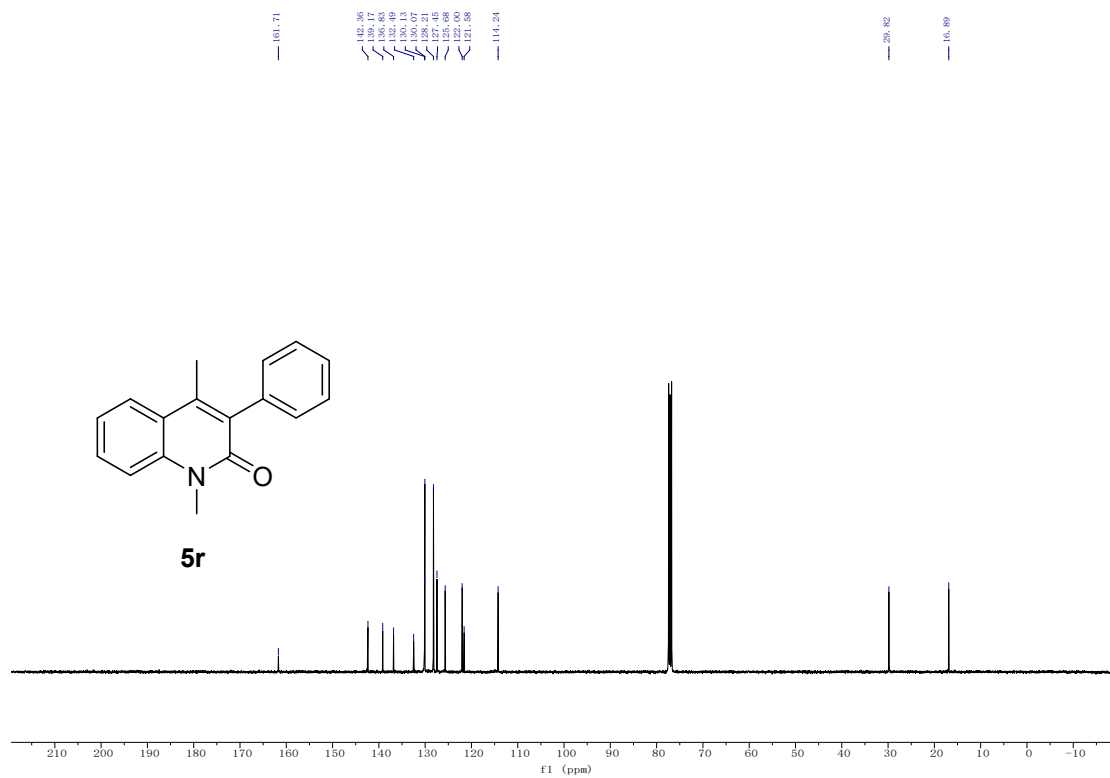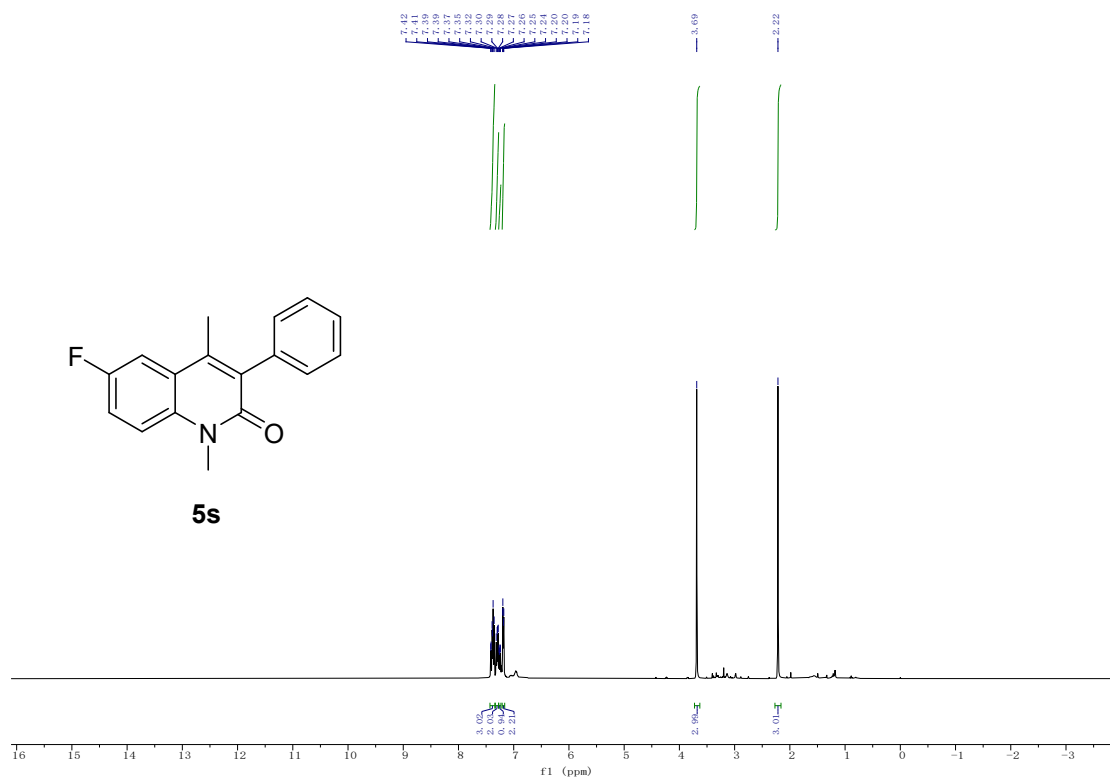

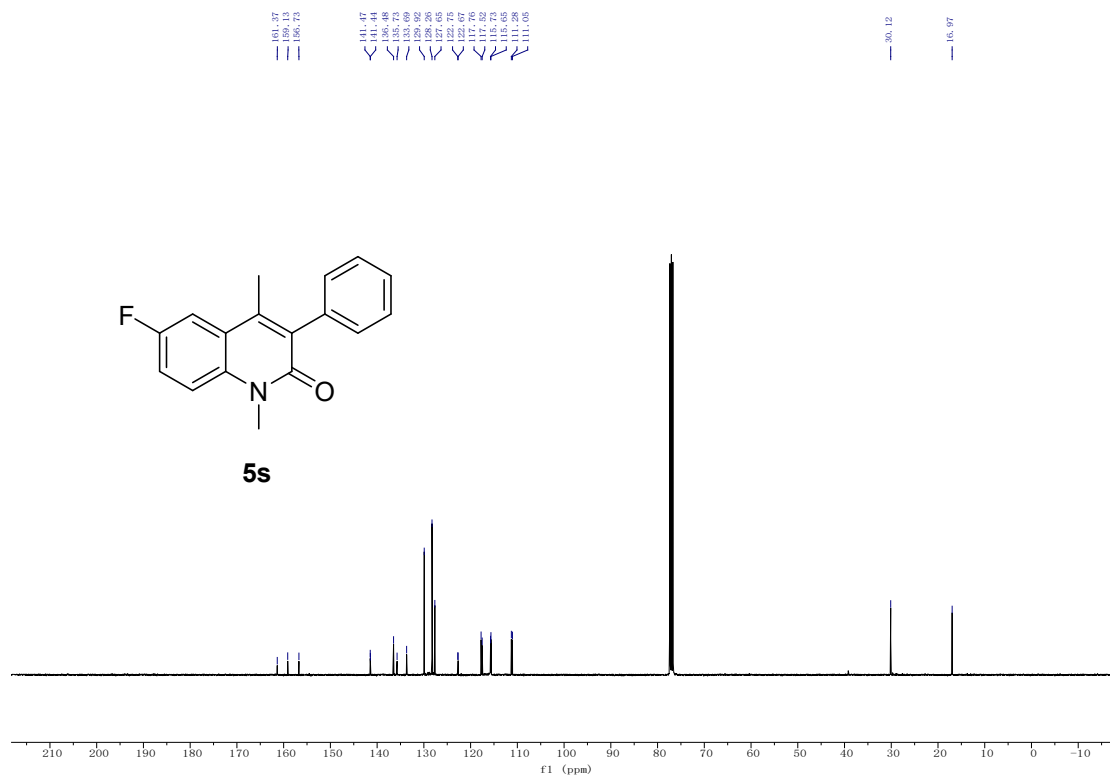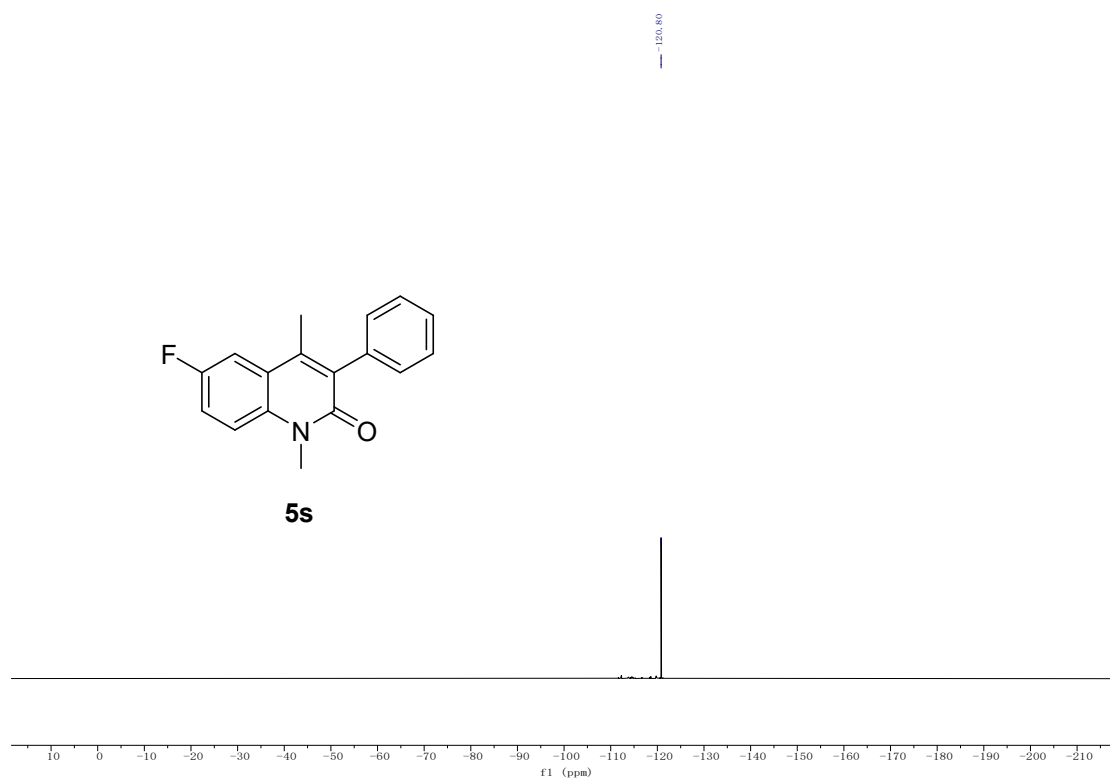

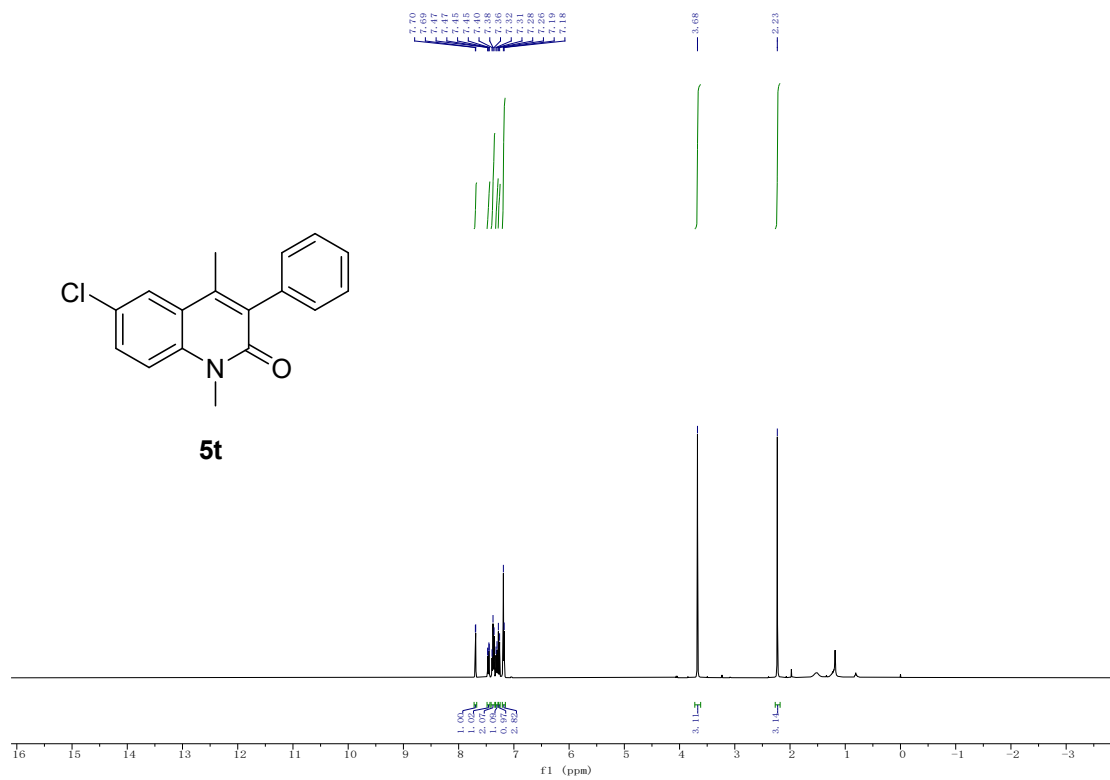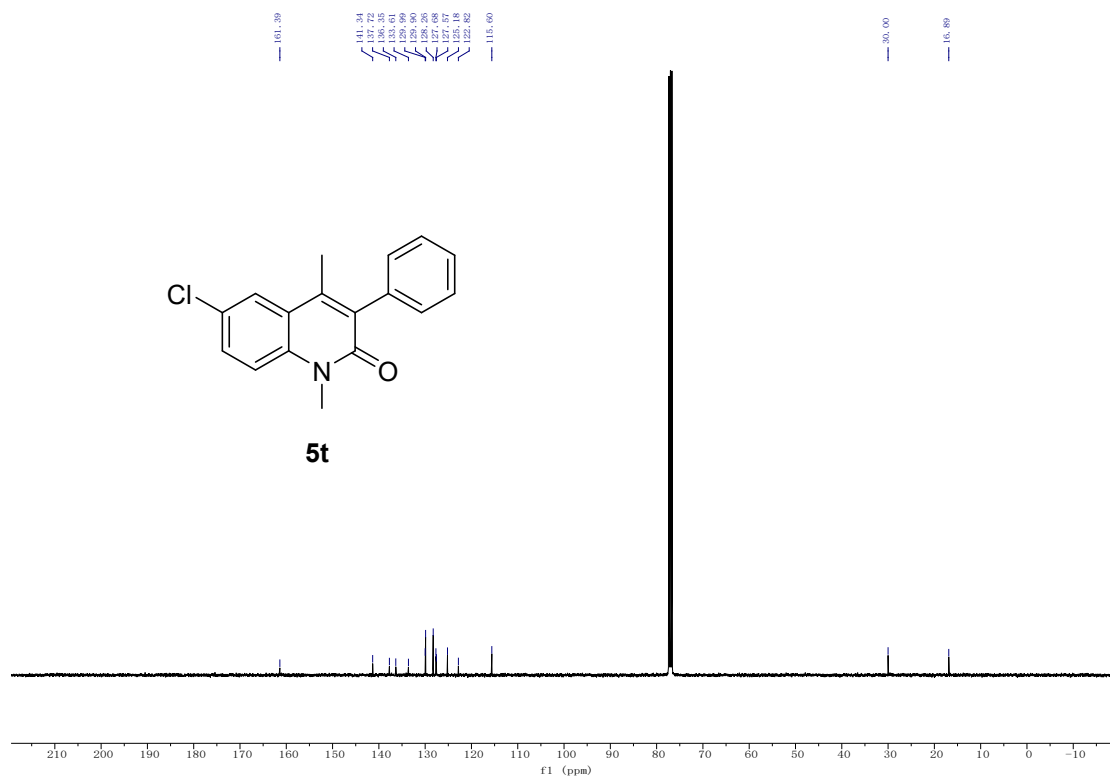

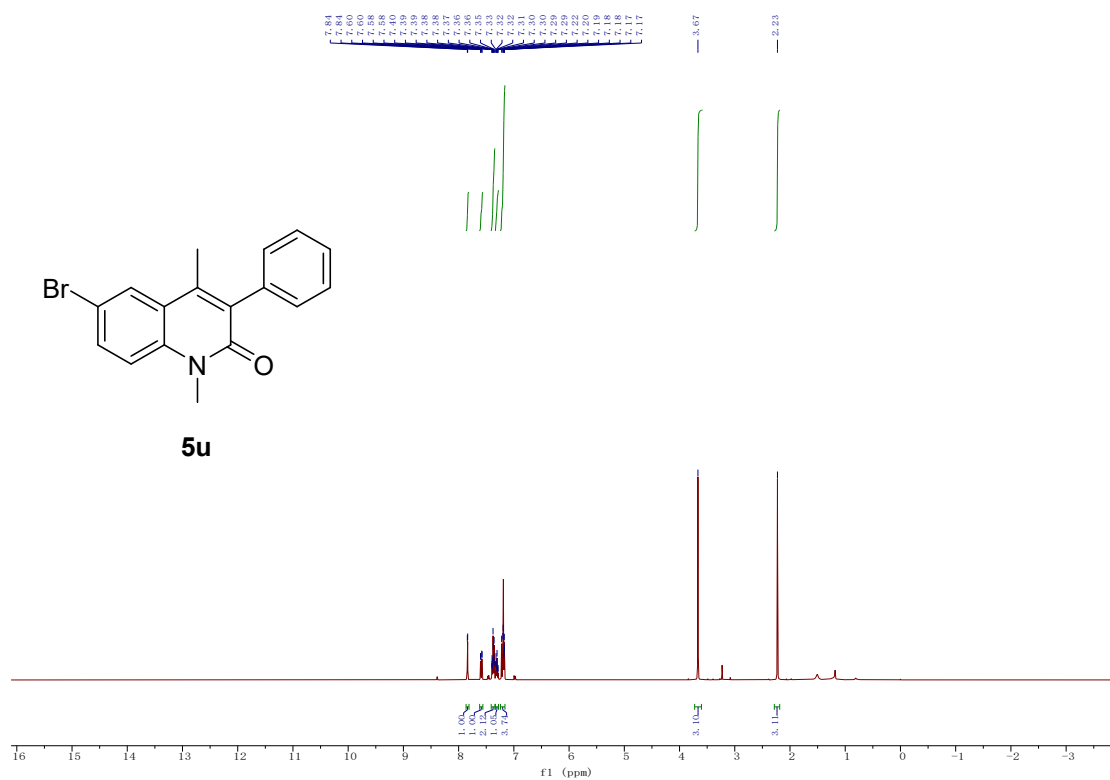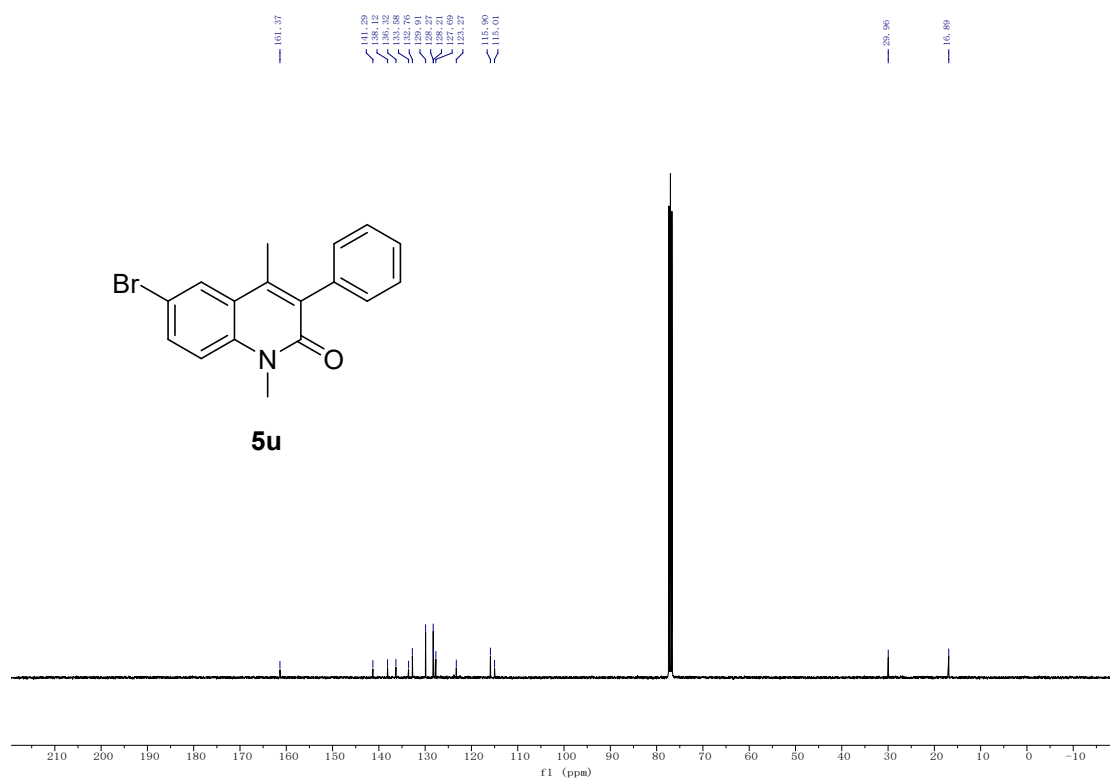

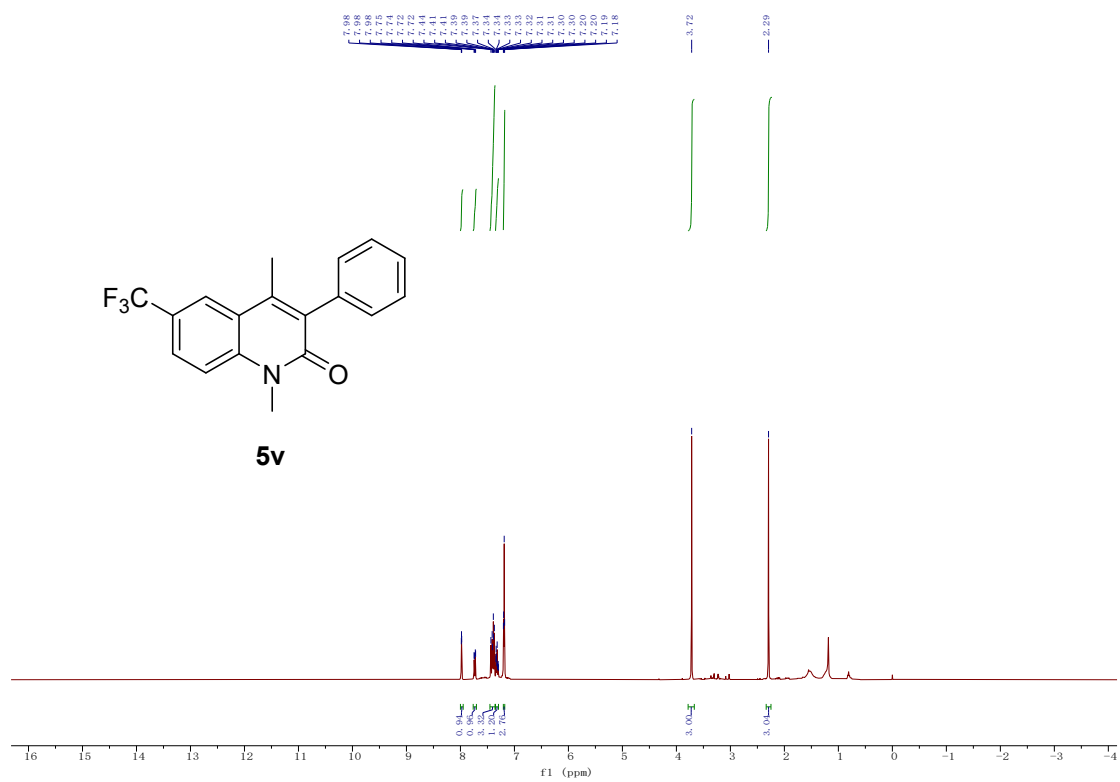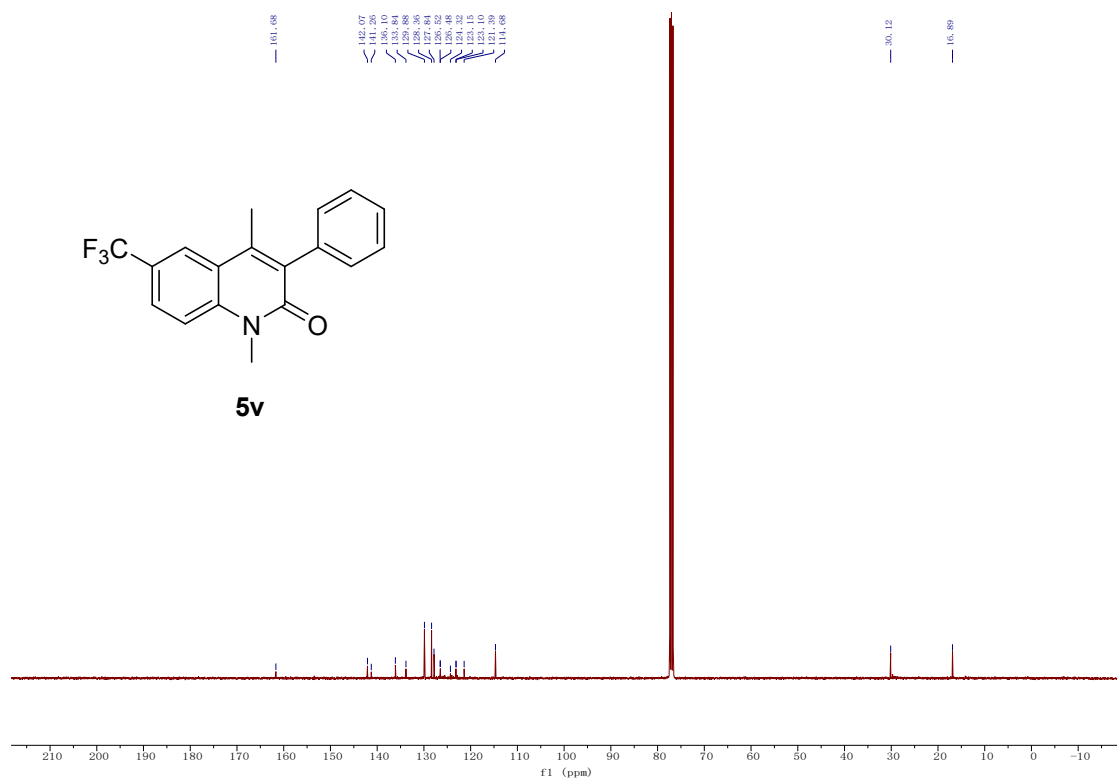

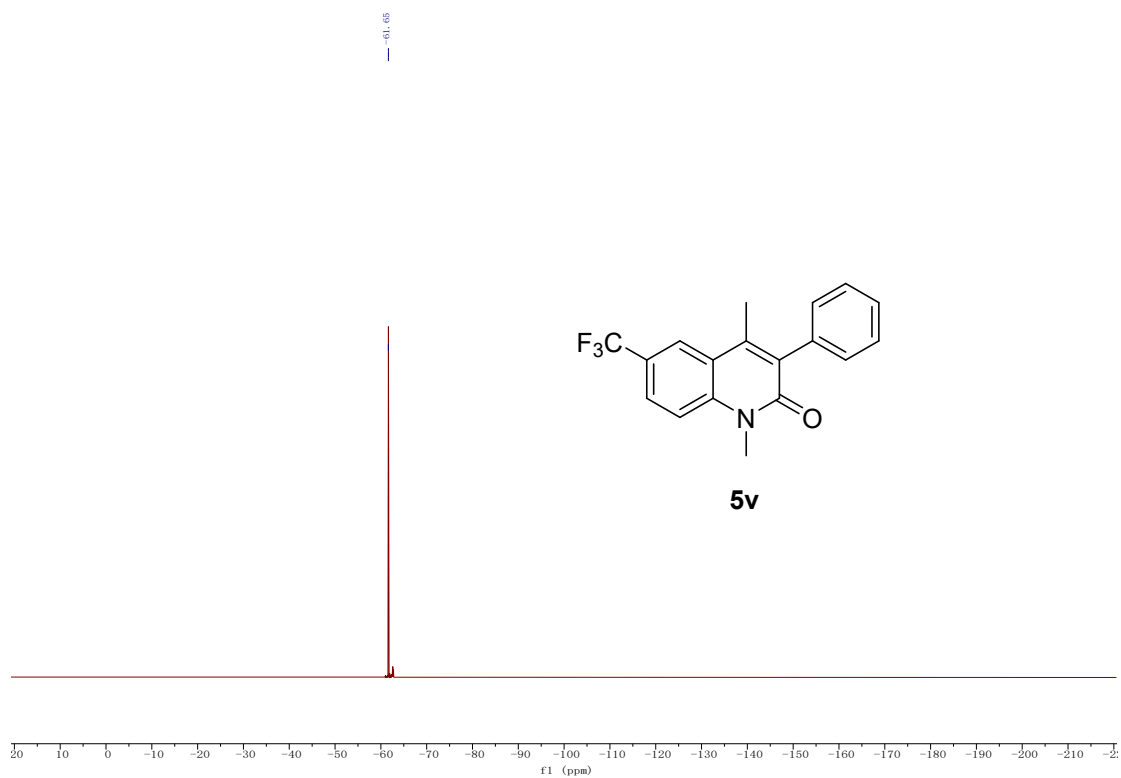



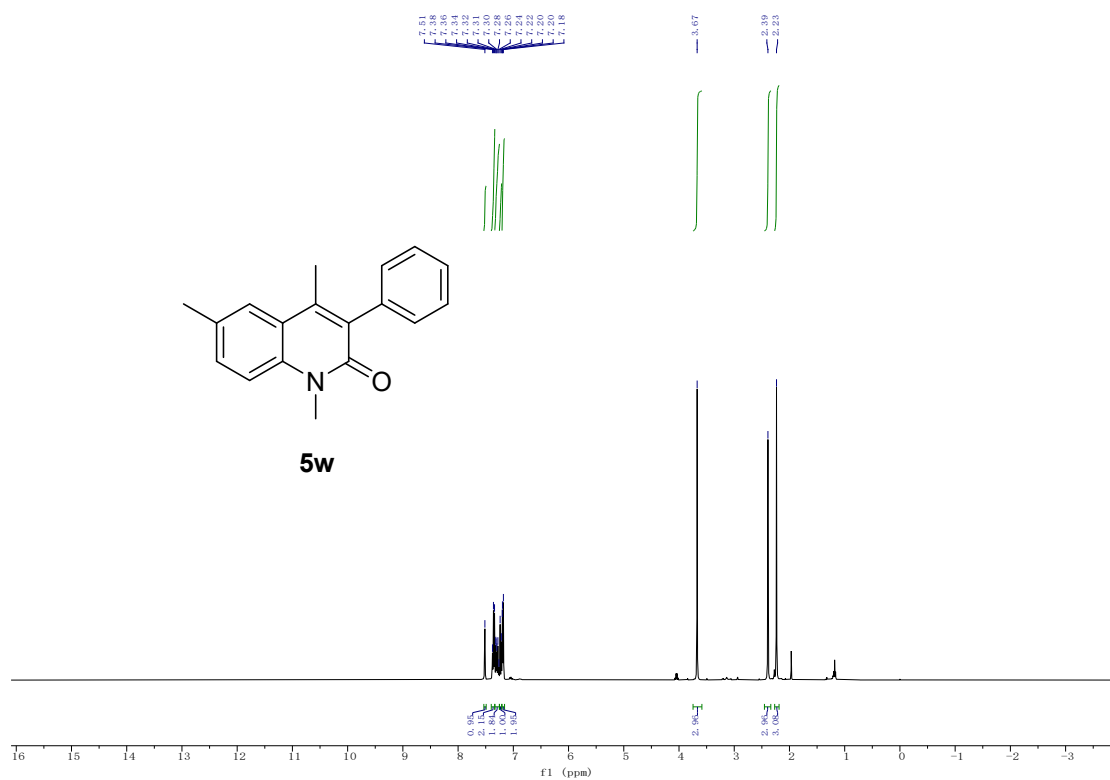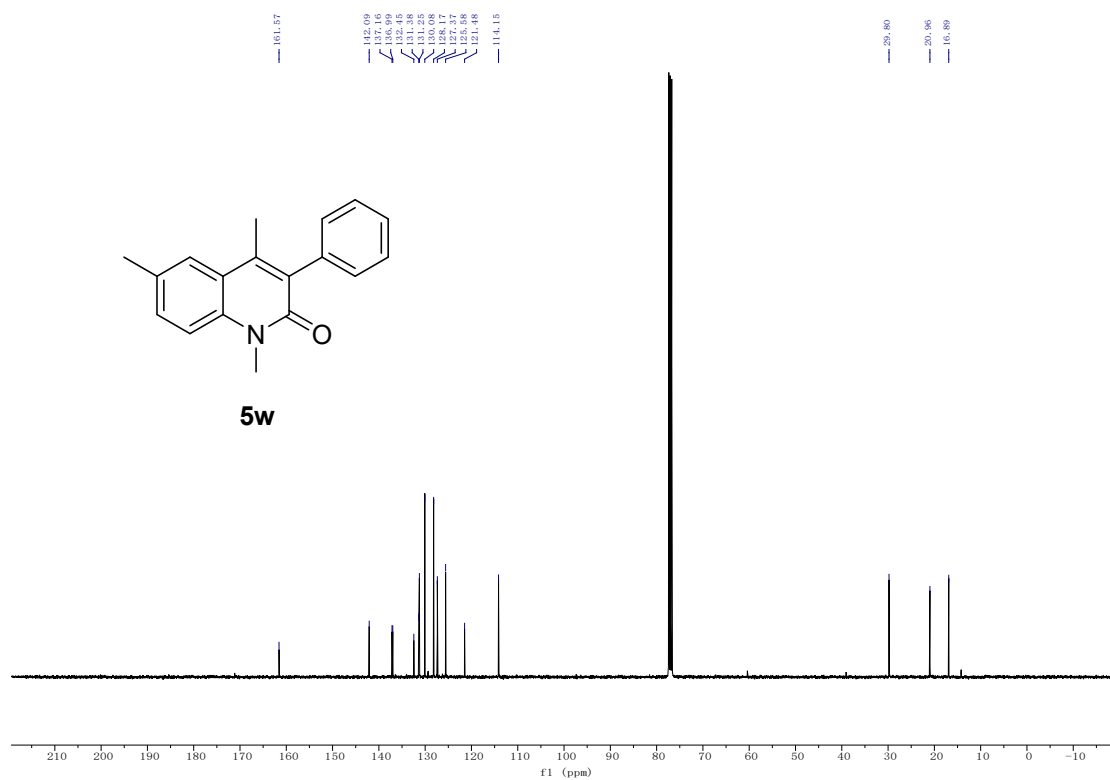



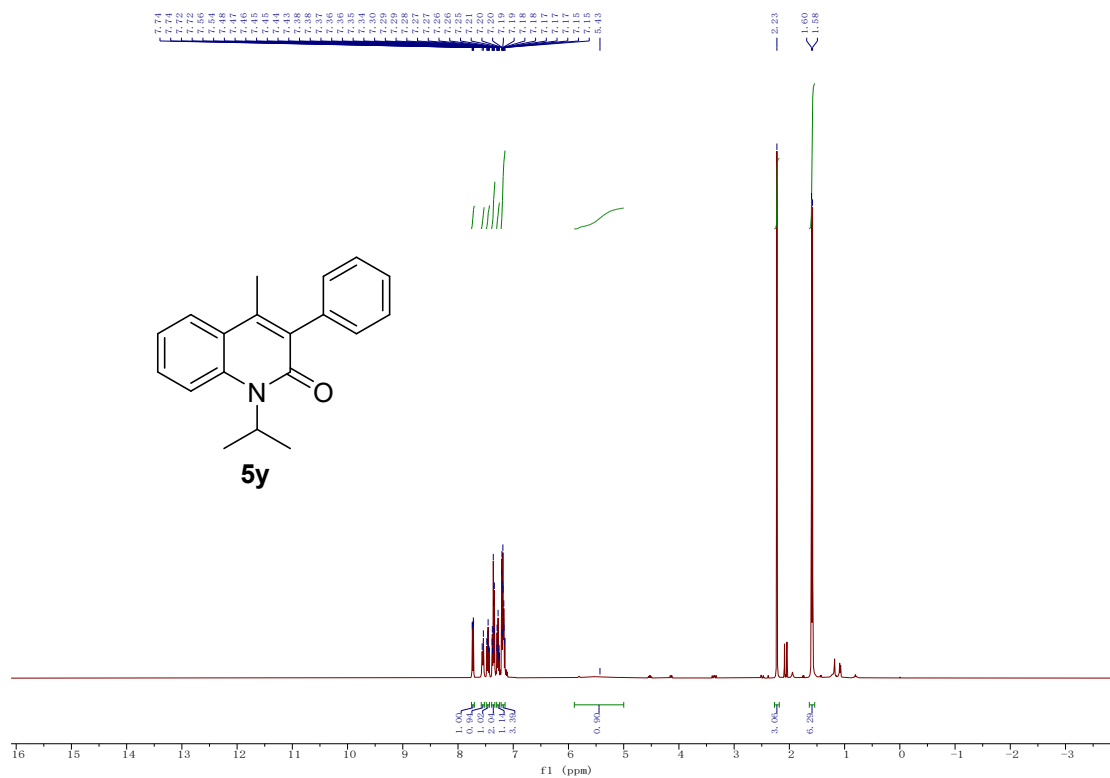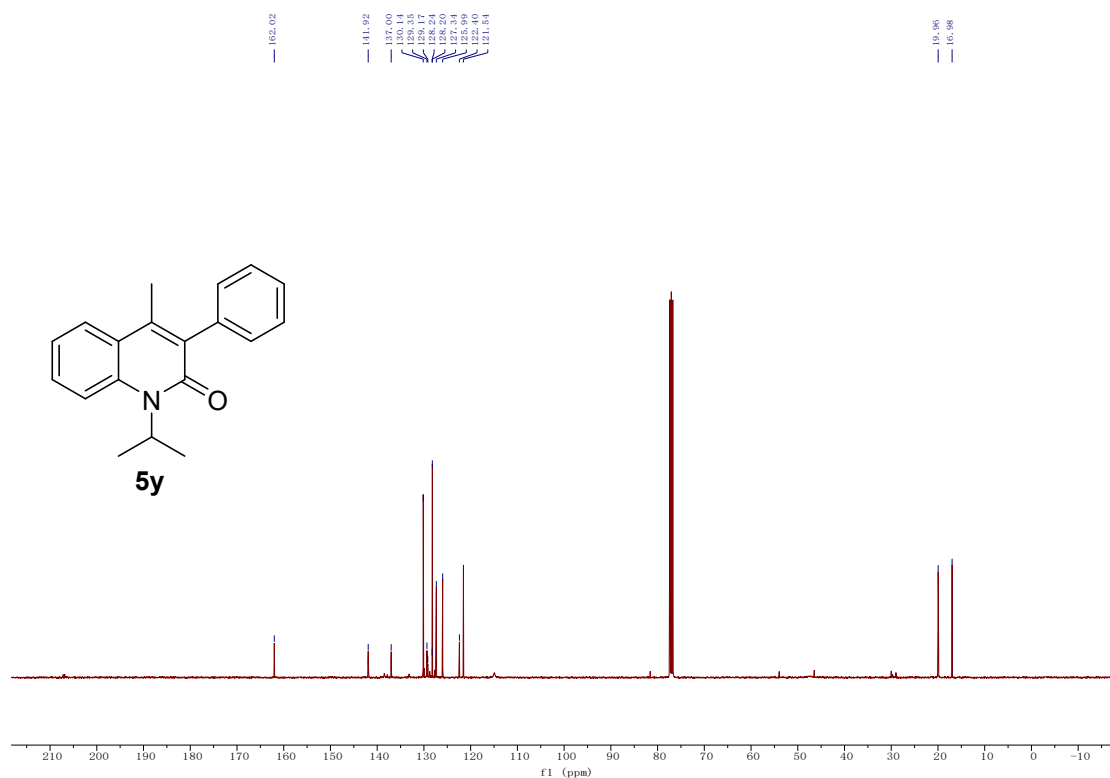

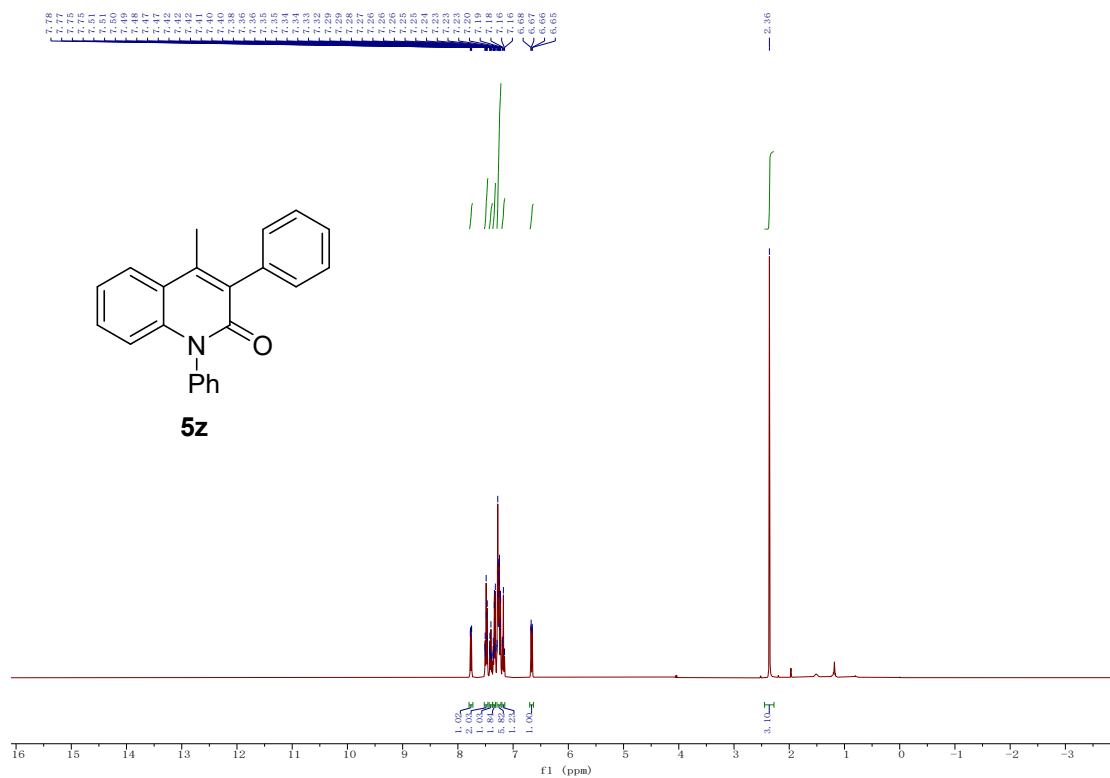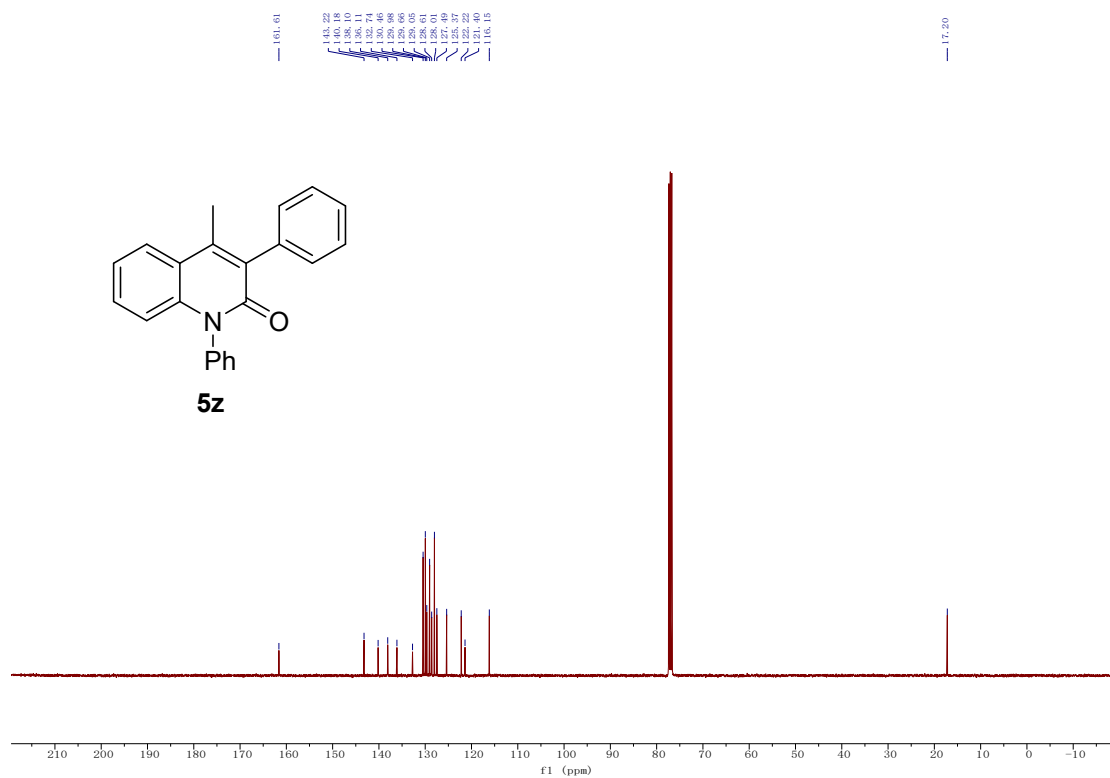

### Computational Details

All calculations were implemented in Gaussian 16.<sup>1</sup> All of the molecular geometries were optimized without constraints at the B3LYP/6-31G(d) level.<sup>2</sup> Vibrational frequency calculations were carried out at the same level to verify all the stationary points as minima (zero imaginary frequencies) and transition states (one imaginary frequency). Single point calculations were performed at the B3LYP/6-311+G(d,p) level using the SMD<sup>3</sup> solvation model. The dielectric constant  $\epsilon=49.4240$  was used approximately according to the volume ratio of the mixed solvent (acetone:water=1:1) and the properties of acetone ( $\epsilon=20.493$ ) and water ( $\epsilon=78.355$ ).<sup>4</sup> Intrinsic reaction coordinate (IRC) calculations<sup>5</sup> were carried out to make sure the transition states indeed connect two relevant minima. Computed structures are illustrated using CYLview.<sup>6</sup>

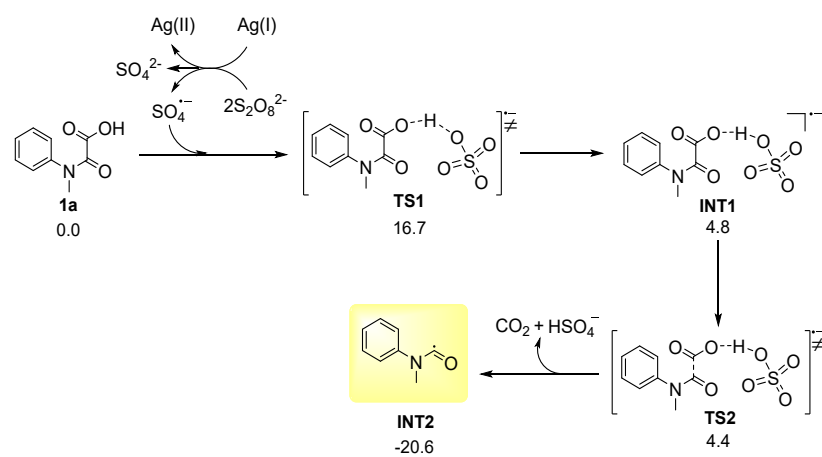

Figure S1. Intermediates and transition states with relative free energies in the decarboxylation process.

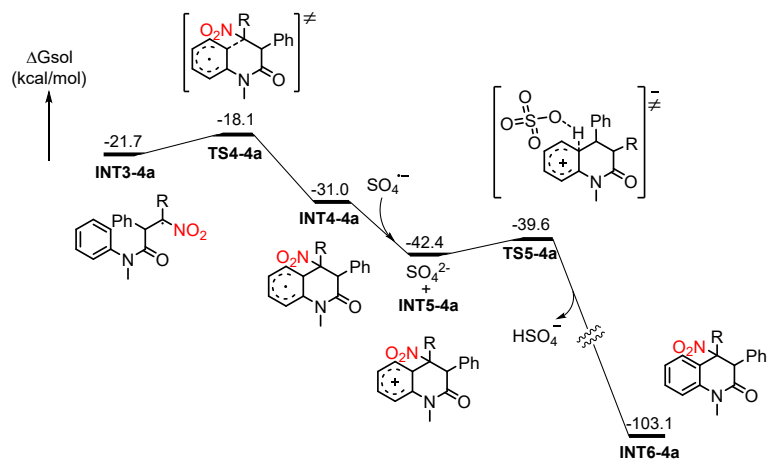

Figure S2. Gibbs free energy profile for the radical cycladdition of INT3-4a.

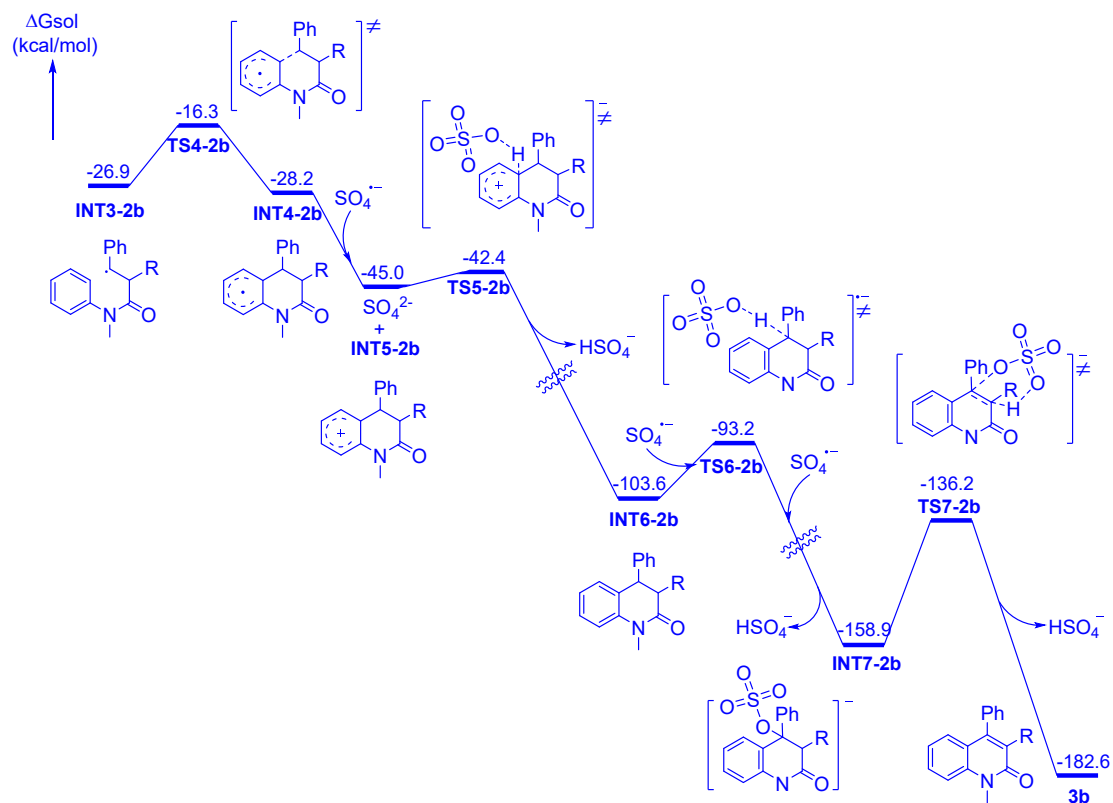

Figure S3. Gibbs free energy profile for the radical cycloaddition and rearomatization of **INT3-2b**.

Table S1. Energetics of Computed Intermediates and TSs.

| Complex  | SCF-Done Energy | Single Point Energy in Solvent | Free Energy Corrections in Solvent | with Imaginary Frequency |
|----------|-----------------|--------------------------------|------------------------------------|--------------------------|
| 1a       | -628.673910     | -629.048930                    | -628.918519                        |                          |
| 2b       | -576.684818     | -577.064774                    | -576.899357                        |                          |
| 4a       | -781.173694     | -781.623342                    | -781.459556                        |                          |
| TS1      | -1327.704253    | -1328.308358                   | -1328.177913                       | -346.91                  |
| INT1     | -1327.745908    | -1328.332092                   | -1328.196899                       |                          |
| TS2      | -1327.746332    | -1328.33253                    | -1328.197582                       | -114.21                  |
| INT2     | -439.481476     | -439.7577229                   | -439.6483609                       |                          |
| TS3-4a   | -1220.614394    | -1221.380266                   | -1221.085086                       | -223.77                  |
| TS3-4a'  | -1220.60914     | -1221.373772                   | -1221.078851                       | -248.60                  |
| INT3-4a  | -1220.687437    | -1221.405454                   | -1221.109600                       |                          |
| INT3-4a' | -1220.686376    | -1221.403189                   | -1221.106581                       |                          |
| TS3-2b   | -1016.12457     | -1016.82053                    | -1016.525982                       | -344.23                  |
| TS3-2b'  | -1016.125758    | -1016.818826                   | -1016.521212                       | -392.32                  |
| INT3-2b  | -1016.202014    | -1016.854473                   | -1016.557656                       |                          |
| INT3-2b' | -1016.196268    | -1016.845213                   | -1016.546245                       |                          |
| TS4-4a   | -1220.687638    | -1221.405345                   | -1221.103905                       | -419.22                  |



|                                             |              |              |              |          |
|---------------------------------------------|--------------|--------------|--------------|----------|
| TS4-2b                                      | -1016.144683 | -1016.841818 | -1016.540844 | -534.08  |
| INT4-4a                                     | -1220.710634 | -1221.427355 | -1221.124531 |          |
| INT4-2b                                     | -1016.212234 | -1016.862365 | -1016.559856 |          |
| INT5-4a                                     | -1220.492886 | -1221.267586 | -1220.962621 |          |
| INT5-2b                                     | -1016.004953 | -1016.71242  | -1016.406502 |          |
| TS5-4a                                      | -1919.743394 | -1920.722359 | -1920.409257 | -960.60  |
| TS5-2b                                      | -1715.251705 | -1716.168307 | -1715.853408 | -1132.29 |
| INT6-4a                                     | -1220.16917  | -1220.874691 | -1220.580909 |          |
| INT6-2b                                     | -1015.676624 | -1016.315855 | -1016.021555 |          |
| TS6-4a                                      | -1919.159484 | -1920.122794 | -1919.825185 | -1895.69 |
| TS6'-4a                                     | -1919.864884 | -1920.786168 | -1920.475874 | -1048.52 |
| 5a                                          | -1014.488739 | -1015.099514 | -1014.827435 |          |
| TS6-2b                                      | -1714.663699 | -1715.572174 | -1715.275958 | -1644.02 |
| INT7-2b                                     | -1714.179837 | -1715.019693 | -1714.72221  |          |
| TS7-2b                                      | -1714.094235 | -1714.977157 | -1714.68602  | -742.81  |
| 3b                                          | -1014.48992  | -1015.102203 | -1014.830457 |          |
| S <sub>2</sub> O <sub>8</sub> <sup>2-</sup> | -1397.979634 | -1398.545218 | -1398.549589 |          |
| SO <sub>4</sub> <sup>+</sup>                | -699.025882  | -699.2567125 | -699.2710315 |          |
| SO <sub>4</sub> <sup>2-</sup>               | -698.923341  | -699.4388511 | -699.4510791 |          |
| HSO <sub>4</sub> <sup>-</sup>               | -699.668366  | -699.9269407 | -699.9294917 |          |
| H <sub>2</sub> SO <sub>4</sub>              | -700.17362   | -700.3591178 | -700.3493588 |          |
| NO <sub>2</sub> <sup>-</sup>                | -205.11392   | -205.3194717 | -205.3351737 |          |
| NO <sub>2</sub> <sup>•</sup>                | -205.064907  | -205.064907  | -205.1581974 |          |
| CO <sub>2</sub>                             | -188.570988  | -188.650484  | -188.65961   |          |

### Cartesian Coordinates

|    |             |             |             |
|----|-------------|-------------|-------------|
| 3b |             |             |             |
| C  | -1.45103300 | 1.23761600  | -0.05690700 |
| C  | -0.97033400 | 2.54603300  | -0.33590700 |
| C  | -1.82078400 | 3.64900500  | -0.13053400 |
| C  | -3.10734400 | 3.46396900  | 0.35520800  |
| C  | -3.58023300 | 2.18168900  | 0.65744700  |
| C  | -2.75458800 | 1.08829400  | 0.45420100  |
| H  | -1.47419300 | 4.65128500  | -0.34530800 |
| H  | -3.74499700 | 4.33001700  | 0.50717600  |
| H  | -4.58199900 | 2.04343300  | 1.05144800  |
| H  | -3.10509400 | 0.09138300  | 0.69385700  |
| N  | 0.32828000  | 2.72456900  | -0.79651300 |
| C  | 1.22662800  | 1.66454200  | -0.98946900 |
| O  | 2.37395400  | 1.85382300  | -1.38962400 |
| C  | 0.82316500  | 4.06633900  | -1.09419700 |
| H  | 1.84765500  | 3.95666600  | -1.44308400 |
| H  | 0.21361700  | 4.53421000  | -1.87356800 |
| H  | 0.80320100  | 4.69127100  | -0.19560900 |
| C  | 1.64441700  | -0.79171300 | -1.02882300 |
| C  | 0.70005000  | 0.33210000  | -0.71201100 |
| C  | -0.57072800 | 0.10727000  | -0.28011500 |
| C  | -1.03661600 | -1.28253000 | -0.02566500 |
| C  | -0.38753500 | -2.07574100 | 0.93001400  |
| C  | -2.10384000 | -1.82594300 | -0.75404400 |

|   |             |             |             |
|---|-------------|-------------|-------------|
| C | -0.80054900 | -3.38839300 | 1.15369800  |
| H | 0.44285300  | -1.65848900 | 1.49035500  |
| C | -2.51092500 | -3.13986800 | -0.53251800 |
| H | -2.59929600 | -1.21967800 | -1.50630400 |
| C | -1.86217400 | -3.92338400 | 0.42369900  |
| H | -0.29225200 | -3.99263600 | 1.89973700  |
| H | -3.33141900 | -3.55405900 | -1.11134900 |
| H | -2.18148800 | -4.94717100 | 0.59623400  |
| O | 1.58213900  | -1.47540700 | -2.02480300 |
| O | 2.55998200  | -0.94284900 | -0.05509500 |
| C | 3.54967100  | -1.97127900 | -0.28810000 |
| H | 4.06565600  | -1.75009400 | -1.22697300 |
| H | 3.03521000  | -2.93035500 | -0.40606300 |
| C | 4.49087300  | -1.96485600 | 0.89950900  |
| H | 5.26485800  | -2.72834200 | 0.76630000  |
| H | 4.97804200  | -0.99034800 | 1.00153200  |
| H | 3.95042900  | -2.17939200 | 1.82728200  |

5a

|   |             |             |             |
|---|-------------|-------------|-------------|
| C | 1.71526900  | -0.58065300 | -0.73757200 |
| C | 2.67120300  | 0.30007500  | -0.16842700 |
| C | 4.03403500  | -0.05028400 | -0.19529300 |
| C | 4.43873500  | -1.24421100 | -0.77478400 |
| C | 3.50251800  | -2.11743100 | -1.34150900 |
| C | 2.15870900  | -1.78494200 | -1.32013300 |
| H | 4.77592300  | 0.60806800  | 0.23683500  |
| H | 5.49531500  | -1.49547700 | -0.78629100 |
| H | 3.82531600  | -3.04721900 | -1.79879900 |
| H | 1.42877300  | -2.44288200 | -1.77498400 |
| N | 2.24794300  | 1.48927200  | 0.41342300  |
| C | 0.90541900  | 1.88993900  | 0.48251500  |
| O | 0.58893900  | 2.94157700  | 1.03533700  |
| C | 3.23177100  | 2.39571100  | 1.00269000  |
| H | 2.68727400  | 3.25767000  | 1.38050700  |
| H | 3.76123900  | 1.90356600  | 1.82471900  |
| H | 3.95580900  | 2.71431400  | 0.24649100  |
| C | -4.21002600 | 2.13492400  | -0.19371700 |
| C | -3.48300000 | 2.20319100  | 0.99734000  |
| C | -2.13313300 | 1.86141400  | 1.01998400  |
| C | -1.49289300 | 1.42640200  | -0.14917700 |
| C | -2.22439800 | 1.38290800  | -1.34573200 |
| C | -3.57409000 | 1.72961500  | -1.36786700 |
| H | -5.26169700 | 2.40718800  | -0.20786900 |
| H | -3.96954500 | 2.52678400  | 1.91319200  |
| H | -1.56975700 | 1.92281600  | 1.94291100  |
| H | -1.73046100 | 1.07577500  | -2.26268500 |
| H | -4.12456900 | 1.69094800  | -2.30365500 |
| C | -0.07906800 | 0.98178900  | -0.13156500 |
| C | 0.32205200  | -0.20674200 | -0.67470300 |
| C | -0.70750200 | -1.15630200 | -1.22511900 |
| O | -0.71672200 | -1.57886500 | -2.36378300 |
| O | -1.61364800 | -1.46975600 | -0.28930000 |
| C | -2.80181500 | -2.16180500 | -0.74058800 |
| H | -3.08925800 | -1.75489000 | -1.71346300 |
| H | -2.55804600 | -3.22109100 | -0.87342000 |
| C | -3.86964500 | -1.93717500 | 0.31137900  |
| H | -4.79142300 | -2.45269400 | 0.02041300  |
| H | -3.54887800 | -2.32461700 | 1.28347500  |

|                                |             |             |             |
|--------------------------------|-------------|-------------|-------------|
| H                              | -4.08180700 | -0.86887800 | 0.41428000  |
| CO <sub>2</sub>                |             |             |             |
| C                              | -0.69047600 | 1.23809500  | 0.00000000  |
| O                              | 0.47864600  | 1.23809500  | 0.00000000  |
| O                              | -1.85959900 | 1.23809500  | 0.00000000  |
| H <sub>2</sub> SO <sub>4</sub> |             |             |             |
| S                              | -0.27432300 | 0.24052400  | 0.04248200  |
| O                              | 0.19462200  | 0.90127600  | -1.36947900 |
| O                              | 0.20299000  | 1.13917100  | 1.07005000  |
| O                              | -1.89325900 | 0.37861200  | -0.05506100 |
| O                              | -0.00187100 | -1.17895600 | -0.00101400 |
| H                              | -2.13475100 | 1.27501700  | 0.24758200  |
| H                              | 0.15190100  | 0.20483500  | -2.05253600 |
| HSO <sub>4</sub> <sup>-</sup>  |             |             |             |
| S                              | -0.21574100 | 0.37404500  | -0.04868400 |
| O                              | 0.24396600  | 1.01870200  | -1.29560100 |
| O                              | 0.02639100  | 1.15777900  | 1.19338600  |
| O                              | -1.92257300 | 0.44105300  | -0.14796600 |
| O                              | 0.08293400  | -1.06893900 | 0.05256700  |
| H                              | -2.12843000 | 0.96985300  | 0.63989800  |
| INT1                           |             |             |             |
| C                              | 1.85257100  | -1.13910600 | -0.01909800 |
| C                              | 1.89345500  | 0.24363300  | -0.20513600 |
| C                              | 3.09262500  | 0.95293300  | -0.13218600 |
| C                              | 4.27887600  | 0.26710400  | 0.12612600  |
| C                              | 4.25938700  | -1.11785400 | 0.30156500  |
| C                              | 3.05016100  | -1.81204600 | 0.22647900  |
| H                              | 0.89955300  | -1.66610900 | -0.07018200 |
| H                              | 3.08898300  | 2.02925600  | -0.27286200 |
| H                              | 5.21592300  | 0.81478600  | 0.18445500  |
| H                              | 5.18468200  | -1.65311700 | 0.50004400  |
| H                              | 3.02891100  | -2.88858500 | 0.37200600  |
| N                              | 0.66627300  | 0.95498500  | -0.47574400 |
| C                              | 0.24790400  | 1.82892900  | 0.43167900  |
| O                              | 0.73949500  | 2.24116900  | 1.45325700  |
| C                              | -0.12243600 | 0.58170100  | -1.66178600 |
| H                              | -1.18857700 | 0.68634400  | -1.46979100 |
| H                              | 0.18868800  | 1.19165000  | -2.51585900 |
| H                              | 0.03620400  | -0.47755700 | -1.85509100 |
| C                              | -1.32577000 | 2.63159300  | 0.01870900  |
| O                              | -1.04616000 | 3.47522100  | -0.80951400 |
| O                              | -2.20450000 | 2.13863700  | 0.69193300  |
| H                              | -2.05423900 | 0.05874500  | 1.01850400  |
| S                              | -2.11923900 | -1.79029100 | -0.11039500 |
| O                              | -2.95223600 | -2.71875400 | 0.67164900  |
| O                              | -0.89571000 | -2.40160100 | -0.69733800 |
| O                              | -2.86308600 | -0.89518900 | -1.03279400 |
| O                              | -1.45419300 | -0.71083400 | 1.00729000  |
| INT2                           |             |             |             |
| C                              | -1.81307200 | -0.10285200 | -0.69588900 |
| C                              | -0.60912100 | 0.20067100  | -0.04234700 |
| C                              | -0.45939400 | 1.45640900  | 0.56664700  |
| C                              | -1.49994800 | 2.37995400  | 0.51572700  |

|   |             |             |             |
|---|-------------|-------------|-------------|
| C | -2.69815300 | 2.08038300  | -0.13350600 |
| C | -2.84517600 | 0.83416000  | -0.73729900 |
| H | -1.95944000 | -1.06233600 | -1.17519000 |
| H | 0.46267800  | 1.70356200  | 1.07351800  |
| H | -1.36582400 | 3.34662700  | 0.99269100  |
| H | -3.50362600 | 2.80760400  | -0.16753200 |
| H | -3.76888900 | 0.57843800  | -1.24859100 |
| N | 0.43947600  | -0.77258300 | -0.00941900 |
| C | 1.64138500  | -0.59360500 | 0.58998500  |
| O | 2.10498000  | 0.33886800  | 1.19544900  |
| C | 0.23537700  | -2.06735000 | -0.65935300 |
| H | 1.14308800  | -2.65396800 | -0.51984300 |
| H | -0.60984300 | -2.59991500 | -0.21081000 |
| H | 0.04979700  | -1.94077900 | -1.73115200 |

INT3-2b

|   |             |             |             |
|---|-------------|-------------|-------------|
| C | -3.81471500 | 0.27531600  | -2.10091200 |
| C | -2.63913000 | 0.91706500  | -1.69397500 |
| C | -2.66533300 | 2.28658400  | -1.40448600 |
| C | -3.85886800 | 2.99526200  | -1.52174200 |
| C | -5.03079400 | 2.35820100  | -1.93302100 |
| C | -5.00236100 | 0.99507000  | -2.22394700 |
| H | -3.80512200 | -0.78927400 | -2.31167400 |
| H | -1.76063900 | 2.78283000  | -1.08184900 |
| H | -3.86829500 | 4.05758300  | -1.29483400 |
| H | -5.95631600 | 2.91892400  | -2.02493600 |
| H | -5.90675400 | 0.48315800  | -2.54038800 |
| N | -1.42523900 | 0.16251200  | -1.61423700 |
| C | -0.60224800 | 0.29934800  | -0.51467200 |
| O | -0.77351900 | 1.12786200  | 0.36229000  |
| C | -1.17545600 | -0.82359900 | -2.67390100 |
| H | -0.11216400 | -0.87010900 | -2.90744500 |
| H | -1.53621200 | -1.82574900 | -2.40583200 |
| H | -1.70530300 | -0.49631100 | -3.56937400 |
| C | -1.28736300 | -3.82291600 | 3.32891700  |
| C | -0.20174700 | -3.12942500 | 3.88143000  |
| C | 0.50112200  | -2.20907900 | 3.12219900  |
| C | 0.14919900  | -1.94450300 | 1.76787100  |
| C | -0.96167300 | -2.65653400 | 1.23257100  |
| C | -1.66010400 | -3.57444000 | 2.00237300  |
| H | -1.83859500 | -4.54280500 | 3.92637100  |
| H | 0.08976000  | -3.31204700 | 4.91210700  |
| H | 1.34040500  | -1.67089500 | 3.55472600  |
| H | -1.28177800 | -2.46620000 | 0.21283000  |
| H | -2.50776100 | -4.10044300 | 1.57154000  |
| C | 0.89193800  | -1.00355800 | 1.02153300  |
| H | 1.66516900  | -0.42993000 | 1.51699800  |
| C | 0.60448700  | -0.69345100 | -0.41430800 |
| C | 1.77421900  | -0.05858900 | -1.15763200 |
| O | 2.04447100  | -0.29054600 | -2.32000600 |
| O | 2.43903900  | 0.82115000  | -0.39735700 |
| C | 3.52558200  | 1.52837600  | -1.04200900 |
| H | 4.25679500  | 0.79580100  | -1.39703400 |
| H | 3.12696600  | 2.05253600  | -1.91576200 |
| C | 4.10988000  | 2.47848400  | -0.01686600 |
| H | 4.93486100  | 3.04404800  | -0.46286000 |
| H | 3.35162800  | 3.18582800  | 0.33237200  |
| H | 4.49485500  | 1.92968900  | 0.84832400  |

|          |             |             |             |
|----------|-------------|-------------|-------------|
| H        | 0.37639700  | -1.61294400 | -0.95560300 |
| INT3-2b' |             |             |             |
| C        | -2.30168500 | 1.69751500  | -2.48282400 |
| C        | -2.09672100 | 1.06148800  | -1.25037500 |
| C        | -2.57576000 | 1.65994800  | -0.07814000 |
| C        | -3.23678200 | 2.88567500  | -0.14852500 |
| C        | -3.43982600 | 3.52048600  | -1.37417600 |
| C        | -2.97190600 | 2.91796400  | -2.54177100 |
| H        | -1.92219900 | 1.24818900  | -3.39442100 |
| H        | -2.41384800 | 1.17530700  | 0.87342900  |
| H        | -3.60110800 | 3.34243600  | 0.76731600  |
| H        | -3.95800500 | 4.47382800  | -1.41906700 |
| H        | -3.11847000 | 3.39996700  | -3.50419600 |
| N        | -1.39482400 | -0.18309900 | -1.23334700 |
| C        | -0.38068900 | -0.38798200 | -0.31475800 |
| O        | -0.26140600 | 0.27003500  | 0.70592600  |
| C        | -1.69141300 | -1.12688800 | -2.31453300 |
| H        | -1.43150500 | -2.13887500 | -2.00333600 |
| H        | -2.76793500 | -1.09841400 | -2.50151400 |
| H        | -1.16668600 | -0.89394500 | -3.24701800 |
| C        | -0.59828400 | -5.44696600 | 0.64133400  |
| C        | -1.24248000 | -4.31020700 | 1.12898600  |
| C        | -0.83974700 | -3.04068000 | 0.71538800  |
| C        | 0.20845900  | -2.88598100 | -0.20088400 |
| C        | 0.85867300  | -4.03319600 | -0.67293000 |
| C        | 0.45881500  | -5.30292800 | -0.25730700 |
| H        | -0.91254600 | -6.43561300 | 0.96300300  |
| H        | -2.06105200 | -4.40776600 | 1.83644000  |
| H        | -1.33726400 | -2.16394500 | 1.11721400  |
| H        | 1.69435400  | -3.93893700 | -1.36012000 |
| H        | 0.97726600  | -6.17930500 | -0.63590900 |
| C        | 0.66653500  | -1.49590300 | -0.63447200 |
| H        | 1.49035400  | -1.19132400 | 0.02780800  |
| C        | 1.15199100  | -1.41594500 | -2.04706600 |
| C        | 1.44196600  | -0.15284700 | -2.70298300 |
| O        | 1.54391700  | -0.02177900 | -3.91643900 |
| O        | 1.51034700  | 0.87246300  | -1.82314600 |
| C        | 1.49838500  | 2.20776400  | -2.37101500 |
| H        | 2.46875600  | 2.40541300  | -2.83895000 |
| H        | 0.73308900  | 2.25555700  | -3.15140900 |
| C        | 1.20095500  | 3.15502200  | -1.22555300 |
| H        | 1.17520200  | 4.18602200  | -1.59469300 |
| H        | 0.23382200  | 2.91825000  | -0.77363600 |
| H        | 1.96949600  | 3.08169900  | -0.44996700 |
| H        | 1.14285100  | -2.28292900 | -2.69604700 |
| INT3-4a  |             |             |             |
| C        | -3.85804000 | 1.55764300  | -2.64789100 |
| C        | -3.59524000 | 0.57757000  | -1.69004400 |
| C        | -4.58043700 | 0.18861800  | -0.78373200 |
| C        | -5.84082600 | 0.78455500  | -0.83513400 |
| C        | -6.10914300 | 1.76843600  | -1.78756500 |
| C        | -5.11619700 | 2.15536700  | -2.69042100 |
| H        | -3.07364800 | 1.84465900  | -3.34011800 |
| H        | -4.35099600 | -0.57007500 | -0.04099300 |
| H        | -6.60899500 | 0.48442400  | -0.12827100 |
| H        | -7.08952400 | 2.23456000  | -1.82551900 |

|   |             |             |             |
|---|-------------|-------------|-------------|
| H | -5.32235200 | 2.92271000  | -3.43091900 |
| N | -2.31629600 | -0.08044600 | -1.66665000 |
| C | -1.23786000 | 0.65840800  | -1.26598300 |
| O | -1.34226900 | 1.80144500  | -0.84309900 |
| C | -2.28929100 | -1.39353200 | -2.30683300 |
| H | -1.32513800 | -1.87634400 | -2.17215000 |
| H | -3.05007200 | -2.03312600 | -1.85049400 |
| H | -2.50010800 | -1.30062800 | -3.37762200 |
| C | 0.32156100  | -3.57808000 | 1.19042100  |
| C | -0.27950300 | -2.41082200 | 1.66725300  |
| C | -0.32063700 | -1.26862200 | 0.87113300  |
| C | 0.23439600  | -1.28271100 | -0.41353800 |
| C | 0.83715500  | -2.45054200 | -0.88746700 |
| C | 0.87826800  | -3.59397800 | -0.08748200 |
| H | 0.35336600  | -4.46845900 | 1.81148100  |
| H | -0.71541900 | -2.38843600 | 2.66198400  |
| H | -0.78515300 | -0.35906000 | 1.24304500  |
| H | 1.25449700  | -2.48019400 | -1.88973400 |
| H | 1.34499100  | -4.49740100 | -0.46935300 |
| C | 0.17717600  | 0.01477500  | -1.23200200 |
| H | 0.74045900  | 0.75742500  | -0.65808100 |
| C | 0.88854800  | -0.05159300 | -2.53966100 |
| C | 2.33900700  | 0.09193500  | -2.69705500 |
| O | 2.92110200  | 0.07955000  | -3.76579700 |
| O | 2.92834400  | 0.25905900  | -1.49700500 |
| C | 4.36561500  | 0.43120800  | -1.52168700 |
| H | 4.80868700  | -0.43165300 | -2.02798500 |
| H | 4.59839200  | 1.32195700  | -2.11339500 |
| C | 4.82297700  | 0.55516500  | -0.08305000 |
| H | 5.91007400  | 0.68207400  | -0.05024800 |
| H | 4.35880700  | 1.42030300  | 0.40037100  |
| H | 4.56052100  | -0.34209600 | 0.48578800  |
| N | 0.17595600  | -0.34982200 | -3.76543200 |
| O | -0.65749100 | 0.47095800  | -4.14581300 |
| O | 0.44314800  | -1.41160500 | -4.32190700 |

INT3-4a'

|   |             |             |             |
|---|-------------|-------------|-------------|
| C | -3.73224800 | 0.70224000  | -2.53205500 |
| C | -2.69483100 | 1.06507400  | -1.67040500 |
| C | -2.58033300 | 2.38833300  | -1.23385200 |
| C | -3.50168800 | 3.33983700  | -1.66204400 |
| C | -4.54478700 | 2.98010800  | -2.51854800 |
| C | -4.65711900 | 1.65952300  | -2.95021500 |
| H | -3.81152300 | -0.32072200 | -2.88445100 |
| H | -1.76950700 | 2.66354100  | -0.57024900 |
| H | -3.40694000 | 4.36643700  | -1.32020000 |
| H | -5.26314800 | 3.72532900  | -2.84716900 |
| H | -5.46044300 | 1.36938400  | -3.62114900 |
| N | -1.77830200 | 0.06607600  | -1.19538100 |
| C | -0.44256200 | 0.27594500  | -1.41108100 |
| O | -0.00257600 | 1.28911800  | -1.93676600 |
| C | -2.36870000 | -1.20908400 | -0.78853300 |
| H | -1.73109100 | -1.71464600 | -0.07088100 |
| H | -3.32188500 | -0.99812000 | -0.30044500 |
| H | -2.53400900 | -1.87173500 | -1.64303800 |
| C | -0.40838200 | -4.26463300 | 3.16924400  |
| C | 0.01100100  | -3.02346900 | 3.66485300  |
| C | 0.31485700  | -1.99267200 | 2.79351200  |

|   |             |             |             |
|---|-------------|-------------|-------------|
| C | 0.21997600  | -2.15081700 | 1.37700700  |
| C | -0.21051200 | -3.42479700 | 0.90107200  |
| C | -0.51628600 | -4.44787200 | 1.78627600  |
| H | -0.64800500 | -5.07549300 | 3.85020500  |
| H | 0.09822600  | -2.86546400 | 4.73599500  |
| H | 0.63853100  | -1.03196300 | 3.18467500  |
| H | -0.30621000 | -3.61865000 | -0.15768300 |
| H | -0.84099600 | -5.40635900 | 1.39167600  |
| C | 0.54066900  | -1.01170200 | 0.59694500  |
| H | 0.80865700  | -0.11957500 | 1.15112400  |
| C | 0.62101000  | -0.75669900 | -0.87548500 |
| C | 1.98049900  | -0.07351000 | -1.24455100 |
| O | 2.60484300  | -0.33341600 | -2.23970100 |
| O | 2.32030400  | 0.82302900  | -0.31630700 |
| C | 3.45152500  | 1.66527100  | -0.65554300 |
| H | 4.32707300  | 1.02656300  | -0.80222800 |
| H | 3.22641800  | 2.16193400  | -1.60332600 |
| C | 3.63342200  | 2.64680000  | 0.48315800  |
| H | 4.47839300  | 3.30933000  | 0.26823500  |
| H | 2.73673900  | 3.26069200  | 0.61224100  |
| H | 3.83649200  | 2.12309900  | 1.42275900  |
| N | 0.61759900  | -2.02344500 | -1.72808600 |
| O | 1.47484000  | -2.85364400 | -1.47046500 |
| O | -0.22771000 | -2.11483500 | -2.61267800 |

INT4-2b

|   |             |             |             |
|---|-------------|-------------|-------------|
| C | -0.65425400 | 0.82418400  | 1.20051300  |
| C | -1.01399600 | 1.69999200  | 0.03583300  |
| C | -2.23906600 | 2.31559300  | -0.06415400 |
| C | -3.22497600 | 2.13999900  | 0.93033700  |
| C | -2.96385900 | 1.31591300  | 2.05419000  |
| C | -1.76362400 | 0.68686600  | 2.19755700  |
| H | 0.22770200  | 1.25788000  | 1.70217300  |
| H | -2.46945400 | 2.93548000  | -0.92343200 |
| H | -4.18578800 | 2.63147200  | 0.82261300  |
| H | -3.73388000 | 1.19052800  | 2.81097900  |
| H | -1.56241200 | 0.06142900  | 3.06331000  |
| N | -0.01739700 | 1.84978800  | -0.93980900 |
| C | 1.04519900  | 0.97520200  | -1.09687000 |
| O | 1.92537800  | 1.16135800  | -1.92794100 |
| C | -0.12034400 | 2.94488600  | -1.90420300 |
| H | 0.83291400  | 3.02094900  | -2.42239800 |
| H | -0.91421000 | 2.74754700  | -2.63351600 |
| H | -0.34312000 | 3.87457700  | -1.37476300 |
| C | 2.36496400  | -0.16306800 | 0.63325400  |
| C | 1.10088100  | -0.28341000 | -0.21231700 |
| H | 1.25682300  | -1.10519500 | -0.91490500 |
| C | -0.13529000 | -0.55342400 | 0.66683400  |
| H | 0.18824200  | -1.12646200 | 1.54235100  |
| C | -1.22281600 | -1.33982700 | -0.03331100 |
| C | -1.98485400 | -2.25508400 | 0.70334800  |
| C | -1.53511100 | -1.15310800 | -1.38588400 |
| C | -3.02996400 | -2.96261100 | 0.11247300  |
| H | -1.75368000 | -2.41292100 | 1.75358400  |
| C | -2.57842400 | -1.86116000 | -1.98235500 |
| H | -0.96288900 | -0.45453000 | -1.98771700 |
| C | -3.33135600 | -2.76687500 | -1.23573600 |
| H | -3.60548000 | -3.66931000 | 0.70395100  |

|   |             |             |             |
|---|-------------|-------------|-------------|
| H | -2.80114600 | -1.70325700 | -3.03399800 |
| H | -4.14312400 | -3.31862200 | -1.70121900 |
| O | 2.43611500  | 0.43958900  | 1.68600200  |
| O | 3.39218500  | -0.80485700 | 0.06395400  |
| C | 4.66819200  | -0.68166000 | 0.73789000  |
| H | 4.57503400  | -1.10564600 | 1.74263700  |
| H | 4.90198200  | 0.38171000  | 0.84397700  |
| C | 5.69151200  | -1.41431900 | -0.10558400 |
| H | 6.67843800  | -1.34442500 | 0.36410900  |
| H | 5.42990400  | -2.47247000 | -0.20502100 |
| H | 5.75068500  | -0.97709400 | -1.10681600 |

INT4-4a

|   |             |             |             |
|---|-------------|-------------|-------------|
| C | 1.15429900  | -0.35502200 | -0.78418300 |
| C | 2.28495800  | 0.44661700  | -0.16845200 |
| C | 3.59953000  | 0.15311200  | -0.44997400 |
| C | 3.96133300  | -0.93769000 | -1.26720900 |
| C | 2.95883500  | -1.78699700 | -1.79368600 |
| C | 1.63844200  | -1.55208100 | -1.55883700 |
| H | 0.58890200  | 0.29515800  | -1.47326300 |
| H | 4.38910900  | 0.75557700  | -0.01733700 |
| H | 5.00992500  | -1.13565700 | -1.45995500 |
| H | 3.24765300  | -2.64657000 | -2.39207300 |
| H | 0.87560200  | -2.20236500 | -1.96555200 |
| N | 1.93524400  | 1.50722400  | 0.68425200  |
| C | 0.73460600  | 1.57360400  | 1.38096700  |
| O | 0.54049400  | 2.40076400  | 2.25691800  |
| C | 2.97130700  | 2.44963500  | 1.10351400  |
| H | 2.48138600  | 3.27388300  | 1.61635300  |
| H | 3.67972700  | 1.97505400  | 1.79305200  |
| H | 3.51009100  | 2.81084300  | 0.22469800  |
| C | -3.25433400 | 2.67786600  | -1.56183100 |
| C | -3.68286800 | 1.77913500  | -0.58487200 |
| C | -2.75419100 | 1.13716500  | 0.23212000  |
| C | -1.38399900 | 1.37630000  | 0.07723200  |
| C | -0.96277200 | 2.28995600  | -0.89708900 |
| C | -1.89184300 | 2.93501100  | -1.71207400 |
| H | -3.97797500 | 3.17996500  | -2.19731700 |
| H | -4.74208500 | 1.57809200  | -0.45412500 |
| H | -3.09238800 | 0.43529000  | 0.98811500  |
| H | 0.09288700  | 2.51726700  | -1.00945100 |
| H | -1.54857000 | 3.64237500  | -2.46141400 |
| C | -0.39442600 | 0.63250100  | 0.96800600  |
| H | -0.90170300 | 0.37404000  | 1.89832700  |
| C | 0.13361500  | -0.68495400 | 0.33895200  |
| N | -1.09380000 | -1.41585200 | -0.19419800 |
| O | -1.83711600 | -1.88627400 | 0.66077500  |
| O | -1.30536400 | -1.41488700 | -1.39869700 |
| C | 0.79172000  | -1.63869000 | 1.34159800  |
| O | 0.92763100  | -2.82240100 | 1.15032400  |
| O | 1.27583600  | -0.95838700 | 2.38840100  |
| C | 2.10030200  | -1.69629300 | 3.32496300  |
| H | 1.44508300  | -2.34048000 | 3.91900000  |
| H | 2.78071400  | -2.33395500 | 2.75486700  |
| C | 2.82749500  | -0.67106600 | 4.17059400  |
| H | 3.43611000  | -1.17660900 | 4.92752400  |
| H | 3.48740700  | -0.05770800 | 3.54863700  |
| H | 2.11818800  | -0.00921400 | 4.67633400  |



## INT5-2b

|   |             |             |             |
|---|-------------|-------------|-------------|
| C | -0.58382700 | 0.63574300  | 1.13984900  |
| C | -0.93545600 | 1.62492300  | 0.08663100  |
| C | -2.05555600 | 2.46040600  | 0.26600100  |
| C | -2.86584700 | 2.29451600  | 1.37176700  |
| C | -2.62271400 | 1.31660500  | 2.38070900  |
| C | -1.54419600 | 0.50532100  | 2.25457700  |
| H | 0.34987200  | 1.03668500  | 1.60651300  |
| H | -2.31397700 | 3.20698300  | -0.47220400 |
| H | -3.73548900 | 2.93842400  | 1.47079000  |
| H | -3.29690500 | 1.23733000  | 3.22587300  |
| H | -1.31181100 | -0.24053500 | 3.00882900  |
| N | -0.15477400 | 1.71915900  | -1.01234500 |
| C | 0.87967800  | 0.77184000  | -1.32419000 |
| O | 1.54463600  | 0.91642100  | -2.32011200 |
| C | -0.38930700 | 2.77889100  | -2.01290000 |
| H | 0.40864800  | 2.71601300  | -2.74767200 |
| H | -1.35260400 | 2.62204400  | -2.50479300 |
| H | -0.36604300 | 3.75459400  | -1.52456900 |
| C | 2.32517100  | -0.03011000 | 0.48764900  |
| C | 1.10442500  | -0.39447000 | -0.36815300 |
| H | 1.36999700  | -1.24622200 | -0.99559200 |
| C | -0.11346600 | -0.71680600 | 0.51193400  |
| H | 0.22094400  | -1.35016800 | 1.34060700  |
| C | -1.24796100 | -1.42184800 | -0.21293400 |
| C | -2.19519600 | -2.11952700 | 0.54889800  |
| C | -1.40620000 | -1.37845700 | -1.60324900 |
| C | -3.28371300 | -2.74085200 | -0.05767900 |
| H | -2.07224500 | -2.19480200 | 1.62636300  |
| C | -2.49637700 | -2.00220100 | -2.21365500 |
| H | -0.67619500 | -0.88581700 | -2.23734800 |
| C | -3.44031600 | -2.67873300 | -1.44398200 |
| H | -4.00149600 | -3.28387800 | 0.54925100  |
| H | -2.59788200 | -1.96454100 | -3.29382600 |
| H | -4.28474300 | -3.16686200 | -1.92012200 |
| O | 2.28264100  | 0.80761400  | 1.37595700  |
| O | 3.39147100  | -0.71793000 | 0.13349500  |
| C | 4.63839700  | -0.42840900 | 0.85293500  |
| H | 4.46585400  | -0.63706200 | 1.91186700  |
| H | 4.84407000  | 0.63891500  | 0.74004400  |
| C | 5.71444000  | -1.30200200 | 0.24836400  |
| H | 6.66286600  | -1.11132900 | 0.76040000  |
| H | 5.47019000  | -2.36230600 | 0.36075400  |
| H | 5.84663100  | -1.08195700 | -0.81481200 |

## INT5-4a

|   |            |             |             |
|---|------------|-------------|-------------|
| C | 1.19639000 | -0.37303600 | -0.80794500 |
| C | 2.33596100 | 0.56960500  | -0.51980300 |
| C | 3.51799400 | 0.44294700  | -1.26904900 |
| C | 3.70140600 | -0.64435800 | -2.10551800 |
| C | 2.74451500 | -1.68357300 | -2.25172400 |
| C | 1.56493800 | -1.59041100 | -1.58928400 |
| H | 0.51680400 | 0.18664700  | -1.48566600 |
| H | 4.31730300 | 1.16231100  | -1.16031000 |
| H | 4.63908000 | -0.71652700 | -2.64991800 |
| H | 2.96894400 | -2.54168900 | -2.87442800 |
| H | 0.79972900 | -2.34737600 | -1.69708400 |

|   |             |             |             |
|---|-------------|-------------|-------------|
| N | 2.20187600  | 1.53220600  | 0.41909900  |
| C | 1.04994500  | 1.65538500  | 1.28919500  |
| O | 1.04451500  | 2.49454200  | 2.15021000  |
| C | 3.29202900  | 2.50066300  | 0.65471600  |
| H | 2.96180000  | 3.17528200  | 1.43980100  |
| H | 4.19425300  | 1.97564200  | 0.97629900  |
| H | 3.48777900  | 3.06452700  | -0.25967800 |
| C | -3.13506500 | 2.53465900  | -1.49527100 |
| C | -3.49513100 | 1.68932600  | -0.44446100 |
| C | -2.51527400 | 1.13134000  | 0.37351700  |
| C | -1.16253500 | 1.40736600  | 0.14259100  |
| C | -0.80718100 | 2.26723800  | -0.90576200 |
| C | -1.79059000 | 2.82704700  | -1.72151300 |
| H | -3.90037700 | 2.97220100  | -2.12822500 |
| H | -4.54058200 | 1.46757200  | -0.25583000 |
| H | -2.80168700 | 0.47568500  | 1.19076400  |
| H | 0.23173900  | 2.53870200  | -1.07598000 |
| H | -1.50490300 | 3.49861300  | -2.52494100 |
| C | -0.12293600 | 0.73348000  | 1.03002500  |
| H | -0.55871800 | 0.54000500  | 2.01052200  |
| C | 0.38598200  | -0.61580300 | 0.46972200  |
| N | -0.85842600 | -1.46278900 | 0.19110200  |
| O | -1.38899300 | -1.94732200 | 1.17934800  |
| O | -1.25730600 | -1.53280800 | -0.96231300 |
| C | 1.25415100  | -1.43283400 | 1.45368700  |
| O | 1.97937400  | -2.31596600 | 1.04934000  |
| O | 1.11984700  | -1.02368700 | 2.70072000  |
| C | 1.86365500  | -1.76558800 | 3.72866500  |
| H | 1.50725700  | -2.79801700 | 3.70245200  |
| H | 2.91896000  | -1.75415400 | 3.44442100  |
| C | 1.59601200  | -1.08036400 | 5.04905200  |
| H | 2.13966400  | -1.60270000 | 5.84240700  |
| H | 1.93278900  | -0.03953900 | 5.02851500  |
| H | 0.53000900  | -1.10116900 | 5.29247000  |

INT6-2b

|   |             |             |             |
|---|-------------|-------------|-------------|
| C | -0.58322600 | 0.30208800  | 0.81843700  |
| C | -0.10281200 | 1.17337000  | -0.17984700 |
| C | -0.12652200 | 2.55626900  | 0.04125700  |
| C | -0.61994200 | 3.06570800  | 1.24288400  |
| C | -1.09011300 | 2.20867700  | 2.23542100  |
| C | -1.06451200 | 0.83111800  | 2.01239300  |
| H | 0.24662300  | 3.23668300  | -0.71467600 |
| H | -0.62858100 | 4.14063900  | 1.39873200  |
| H | -1.47119800 | 2.60428400  | 3.17166100  |
| H | -1.42783100 | 0.14690800  | 2.77475100  |
| N | 0.37340700  | 0.63880600  | -1.39642700 |
| C | 0.84454400  | -0.66114000 | -1.49494400 |
| O | 1.30149600  | -1.11902900 | -2.53012100 |
| C | 0.53746800  | 1.50526900  | -2.55611700 |
| H | 0.71750400  | 0.86624100  | -3.41846100 |
| H | -0.36898900 | 2.09783400  | -2.70777000 |
| H | 1.39289400  | 2.18030600  | -2.43022500 |
| C | 1.93487600  | -1.24338100 | 0.72704700  |
| C | 0.76017700  | -1.48498300 | -0.21852300 |
| H | 0.79071400  | -2.53490800 | -0.51525900 |
| C | -0.54868700 | -1.18430800 | 0.55695200  |
| H | -0.47548600 | -1.71277800 | 1.51294000  |

|   |             |             |             |
|---|-------------|-------------|-------------|
| C | -1.76078700 | -1.72556600 | -0.19339100 |
| C | -1.99050600 | -3.10741100 | -0.18467200 |
| C | -2.63417300 | -0.90345300 | -0.91010000 |
| C | -3.06448000 | -3.65750100 | -0.88029000 |
| H | -1.32043100 | -3.75562700 | 0.37607500  |
| C | -3.71093500 | -1.45200800 | -1.60896100 |
| H | -2.48027900 | 0.17031700  | -0.91457000 |
| C | -3.92921300 | -2.82875200 | -1.59829800 |
| H | -3.22898200 | -4.73117800 | -0.85890700 |
| H | -4.38078800 | -0.79852200 | -2.16103700 |
| H | -4.76811600 | -3.25421400 | -2.14161500 |
| O | 2.13214200  | -1.90881600 | 1.71959200  |
| O | 2.66811300  | -0.17946400 | 0.36341500  |
| C | 3.69992800  | 0.25076200  | 1.28136600  |
| H | 4.55457500  | -0.42632000 | 1.18330800  |
| H | 3.31485200  | 0.16542800  | 2.30072000  |
| C | 4.04778400  | 1.67907500  | 0.91149900  |
| H | 4.82792900  | 2.05980500  | 1.57918900  |
| H | 4.41425200  | 1.73705600  | -0.11824700 |
| H | 3.16524500  | 2.32044000  | 1.00256600  |

INT6-4a

|   |             |             |             |
|---|-------------|-------------|-------------|
| C | 1.39243400  | -0.60375600 | -0.49167400 |
| C | 2.25192800  | 0.50244700  | -0.31780200 |
| C | 3.33814000  | 0.66095700  | -1.19082200 |
| C | 3.58426100  | -0.27442300 | -2.19262200 |
| C | 2.76325600  | -1.39017200 | -2.33377300 |
| C | 1.67883600  | -1.55158600 | -1.47571100 |
| H | 3.99502500  | 1.51513300  | -1.09071600 |
| H | 4.43064900  | -0.12765300 | -2.85710400 |
| H | 2.96217100  | -2.13178000 | -3.10033500 |
| H | 1.04214200  | -2.42060500 | -1.56966900 |
| N | 2.05313800  | 1.42775700  | 0.73055100  |
| C | 0.89690600  | 1.47118100  | 1.49132400  |
| O | 0.75368500  | 2.23944000  | 2.42698000  |
| C | 3.11147800  | 2.37606200  | 1.06681900  |
| H | 2.81762100  | 2.87152800  | 1.98963400  |
| H | 4.05923400  | 1.84814900  | 1.20831800  |
| H | 3.23220600  | 3.12744000  | 0.27874600  |
| C | -2.95003800 | 2.55125600  | -1.67197800 |
| C | -3.43058400 | 1.88807900  | -0.54345600 |
| C | -2.54217200 | 1.26063700  | 0.32823200  |
| C | -1.16491600 | 1.28387500  | 0.08284800  |
| C | -0.68910300 | 1.95421600  | -1.05101000 |
| C | -1.57768200 | 2.58299600  | -1.92116400 |
| H | -3.63992500 | 3.04131600  | -2.35294300 |
| H | -4.49671000 | 1.85800800  | -0.33846300 |
| H | -2.91849700 | 0.73795500  | 1.20243600  |
| H | 0.37295300  | 1.98843700  | -1.26327800 |
| H | -1.19445500 | 3.09808200  | -2.79736400 |
| C | -0.24285200 | 0.55845500  | 1.05504900  |
| H | -0.80428500 | 0.35074100  | 1.96471400  |
| C | 0.27971200  | -0.79435300 | 0.50806900  |
| N | -0.97025500 | -1.49999800 | -0.04367400 |
| O | -1.75965100 | -1.87475100 | 0.81852600  |
| O | -1.14760300 | -1.56695500 | -1.24828300 |
| C | 0.81956100  | -1.74237200 | 1.59736100  |
| O | 0.95552300  | -2.93162000 | 1.43956000  |

|   |            |             |            |
|---|------------|-------------|------------|
| O | 1.19379400 | -1.05007200 | 2.67771200 |
| C | 1.83718800 | -1.79742400 | 3.74172800 |
| H | 1.11287000 | -2.51351800 | 4.14050000 |
| H | 2.66939100 | -2.36153300 | 3.31094400 |
| C | 2.28656600 | -0.78598100 | 4.77565800 |
| H | 2.76652500 | -1.30078200 | 5.61445100 |
| H | 3.00328800 | -0.08138800 | 4.34282400 |
| H | 1.43434600 | -0.21530000 | 5.15605200 |

INT7-2b

|   |             |             |             |
|---|-------------|-------------|-------------|
| C | 1.58913300  | 0.90330000  | -0.27052500 |
| C | 2.59437300  | 0.09890800  | 0.30340000  |
| C | 3.83399600  | 0.67963000  | 0.61982500  |
| C | 4.08610900  | 2.02155100  | 0.34584400  |
| C | 3.10935400  | 2.80930700  | -0.25637900 |
| C | 1.87635700  | 2.23555800  | -0.56299700 |
| H | 4.60712400  | 0.08197300  | 1.08609200  |
| H | 5.05508600  | 2.44299300  | 0.60246400  |
| H | 3.30235500  | 3.85160100  | -0.49448100 |
| H | 1.11282300  | 2.82897600  | -1.05377700 |
| N | 2.38603300  | -1.26700000 | 0.55254600  |
| C | 1.13848100  | -1.86195500 | 0.52827400  |
| O | 0.95384600  | -3.00668700 | 0.91122300  |
| C | 3.51525300  | -2.12629600 | 0.86959200  |
| H | 3.15515400  | -3.15225000 | 0.83372500  |
| H | 4.30900900  | -1.98115000 | 0.13062900  |
| H | 3.91087500  | -1.92093400 | 1.87289100  |
| C | -0.69689100 | -0.54927600 | 1.43445000  |
| C | -0.03843000 | -0.98438500 | 0.13579100  |
| C | 0.28908500  | 0.27143700  | -0.74308600 |
| C | -0.92627700 | 1.20855100  | -0.68095500 |
| C | -1.07064300 | 2.18146200  | 0.31657400  |
| C | -1.97113100 | 1.01165100  | -1.59090700 |
| C | -2.23251600 | 2.95079600  | 0.39819300  |
| H | -0.27866900 | 2.32674300  | 1.04242800  |
| C | -3.13177500 | 1.77946600  | -1.50585800 |
| H | -1.87309100 | 0.23215500  | -2.33820400 |
| C | -3.26868400 | 2.75476300  | -0.51529000 |
| H | -2.32280700 | 3.70526200  | 1.17635800  |
| H | -3.93575700 | 1.61081700  | -2.21813900 |
| H | -4.17338300 | 3.35566200  | -0.45601900 |
| O | -0.11344300 | -0.09112400 | 2.39669500  |
| O | -2.03240000 | -0.71085500 | 1.37877000  |
| C | -2.78434100 | -0.15389700 | 2.47052200  |
| H | -2.38687100 | 0.83863400  | 2.69972300  |
| H | -2.64738000 | -0.78602200 | 3.35561700  |
| C | -4.23207400 | -0.09154600 | 2.02316100  |
| H | -4.85698100 | 0.31807900  | 2.82569300  |
| H | -4.32205300 | 0.55080200  | 1.14234100  |
| H | -4.60382200 | -1.08873900 | 1.76617900  |
| S | 0.35422300  | -1.56723400 | -2.84548100 |
| O | 0.71483000  | -1.23680200 | -4.22854100 |
| O | 0.53394700  | -0.01313300 | -2.12745900 |
| O | -1.07337800 | -1.90342800 | -2.61367900 |
| O | 1.31014000  | -2.41426900 | -2.10271400 |
| H | -0.73833600 | -1.61188500 | -0.41622500 |

NO<sub>2</sub><sup>-</sup>

|                                             |             |             |             |
|---------------------------------------------|-------------|-------------|-------------|
| N                                           | -2.59724800 | 0.18489300  | 0.00000000  |
| O                                           | -3.19125700 | 1.30917700  | 0.00000000  |
| O                                           | -1.32658400 | 0.23260800  | 0.00000000  |
| NO <sub>2</sub> •                           |             |             |             |
| N                                           | -2.49343500 | 0.28163700  | 0.00000000  |
| O                                           | -3.13064100 | 1.30229200  | 0.00000000  |
| O                                           | -1.31584100 | 0.03454500  | 0.00000000  |
| S <sub>2</sub> O <sub>8</sub> <sup>2-</sup> |             |             |             |
| S                                           | -1.78362400 | -0.38284900 | 1.21126800  |
| O                                           | -0.81408200 | 0.73854300  | 0.34268200  |
| O                                           | -0.87276300 | -1.28426800 | 1.94534000  |
| O                                           | -2.49675000 | 0.61114000  | 2.05006200  |
| O                                           | -2.62644100 | -1.05607100 | 0.19695600  |
| S                                           | 1.50372300  | 0.80280500  | -0.84245300 |
| O                                           | 2.03657700  | -0.08186400 | -1.90719100 |
| O                                           | 1.18333600  | 2.17945700  | -1.28348200 |
| O                                           | -0.00849500 | 0.00964500  | -0.65330700 |
| O                                           | 2.21266700  | 0.72450900  | 0.45072400  |
| SO <sub>4</sub> <sup>-</sup>                |             |             |             |
| S                                           | -0.37473700 | 0.38366400  | -0.03543300 |
| O                                           | 0.17341200  | 1.07010400  | -1.22517500 |
| O                                           | 0.23511000  | 0.93263400  | 1.27021600  |
| O                                           | -1.85215700 | 0.35624300  | 0.02105500  |
| O                                           | 0.22804200  | -1.02508900 | 0.13733800  |
| SO <sub>4</sub> <sup>2-</sup>               |             |             |             |
| S                                           | -0.31806400 | 0.34350100  | 0.00000000  |
| O                                           | 0.19029800  | 1.06244000  | -1.24521500 |
| O                                           | 0.19029800  | 1.06244000  | 1.24521500  |
| O                                           | -1.84314400 | 0.34353900  | 0.00000000  |
| O                                           | 0.19028100  | -1.09436300 | 0.00000000  |
| TS1                                         |             |             |             |
| C                                           | 3.25970100  | -1.52698100 | 0.26762500  |
| C                                           | 2.87175300  | -0.22786100 | -0.10226000 |
| C                                           | 3.87334500  | 0.71915300  | -0.38447800 |
| C                                           | 5.21728300  | 0.36550800  | -0.29034600 |
| C                                           | 5.59922200  | -0.92784600 | 0.07437400  |
| C                                           | 4.60919800  | -1.87014500 | 0.35058800  |
| H                                           | 2.50639000  | -2.26947400 | 0.50626800  |
| H                                           | 3.59057600  | 1.72308400  | -0.66743400 |
| H                                           | 5.97467100  | 1.11304000  | -0.51491400 |
| H                                           | 6.65074700  | -1.19535500 | 0.14145900  |
| H                                           | 4.88172800  | -2.88220700 | 0.64097200  |
| N                                           | 1.49321300  | 0.08986600  | -0.21781000 |
| C                                           | 1.00013800  | 1.33271400  | 0.14888200  |
| O                                           | 1.68861600  | 2.28080600  | 0.49613900  |
| C                                           | 0.54627900  | -0.99133800 | -0.52841000 |
| H                                           | -0.35043500 | -0.58226900 | -0.98905200 |
| H                                           | 1.01845800  | -1.67636200 | -1.23703500 |
| H                                           | 0.23762900  | -1.53857700 | 0.36802700  |
| C                                           | -0.55879800 | 1.44582900  | 0.09841200  |
| O                                           | -1.03398600 | 1.88907400  | -0.94984400 |
| O                                           | -1.10247600 | 1.03835900  | 1.16815100  |
| H                                           | -2.50969200 | 0.79501400  | 1.01978500  |

|   |             |             |             |
|---|-------------|-------------|-------------|
| S | -3.89167100 | -0.56143200 | -0.05125600 |
| O | -4.70098500 | 0.05100600  | -1.15317000 |
| O | -4.76320200 | -1.55428200 | 0.64483300  |
| O | -2.62376300 | -1.14788800 | -0.54762300 |
| O | -3.55102300 | 0.56201900  | 1.00031000  |

TS2

|   |             |             |             |
|---|-------------|-------------|-------------|
| C | 1.89689000  | -1.17283400 | -0.01884600 |
| C | 1.93958700  | 0.21020900  | -0.20357700 |
| C | 3.13868200  | 0.91850700  | -0.12352400 |
| C | 4.32344300  | 0.23132500  | 0.13907300  |
| C | 4.30208700  | -1.15383600 | 0.31222000  |
| C | 3.09259100  | -1.84729200 | 0.23118500  |
| H | 0.94191900  | -1.69620400 | -0.07275000 |
| H | 3.13560700  | 1.99513600  | -0.26246200 |
| H | 5.26073300  | 0.77803700  | 0.20296600  |
| H | 5.22611900  | -1.69005100 | 0.51410100  |
| H | 3.07040700  | -2.92395500 | 0.37604300  |
| N | 0.71265900  | 0.92228400  | -0.47458300 |
| C | 0.27187700  | 1.76484900  | 0.45092300  |
| O | 0.73749100  | 2.16496200  | 1.48683700  |
| C | -0.06352700 | 0.56514600  | -1.67322900 |
| H | -1.13174100 | 0.65994600  | -1.48746800 |
| H | 0.25021900  | 1.19153600  | -2.51450400 |
| H | 0.10420200  | -0.48928700 | -1.88430900 |
| C | -1.38397600 | 2.62365700  | 0.01261300  |
| O | -1.07684300 | 3.42814600  | -0.83386400 |
| O | -2.23219200 | 2.14908500  | 0.72411500  |
| H | -2.04631000 | 0.06744600  | 1.06157400  |
| S | -2.10643700 | -1.76097700 | -0.09898100 |
| O | -2.96491900 | -2.67979200 | 0.66683000  |
| O | -0.88464700 | -2.38691700 | -0.67208400 |
| O | -2.82532700 | -0.84994200 | -1.02605600 |
| O | -1.44054700 | -0.69704100 | 1.03367900  |

TS3-2b

|   |             |             |             |
|---|-------------|-------------|-------------|
| C | 3.52029800  | 1.01481300  | 0.93141000  |
| C | 2.48526300  | 1.28482500  | 0.02370900  |
| C | 2.79590900  | 1.51230700  | -1.32512500 |
| C | 4.12309200  | 1.46178000  | -1.74807800 |
| C | 5.15489000  | 1.19534300  | -0.84662300 |
| C | 4.84433500  | 0.97402400  | 0.49449500  |
| H | 3.30258100  | 0.82629000  | 1.97649100  |
| H | 2.00650200  | 1.72021000  | -2.03412900 |
| H | 4.34794000  | 1.64115500  | -2.79592000 |
| H | 6.18645400  | 1.16169000  | -1.18504700 |
| H | 5.63268800  | 0.76230300  | 1.21185400  |
| N | 1.12975700  | 1.32638400  | 0.49958200  |
| C | 0.07377500  | 1.00622000  | -0.29012700 |
| O | 0.00248400  | 0.83551400  | -1.47647600 |
| C | 0.88710100  | 1.65459600  | 1.90986000  |
| H | -0.15252200 | 1.95449300  | 2.03890800  |
| H | 1.09929000  | 0.80299700  | 2.56845400  |
| H | 1.53628300  | 2.48679100  | 2.19420300  |
| C | 0.43470600  | -4.79982700 | 0.00669700  |
| C | -0.75887700 | -4.69339500 | -0.71296600 |
| C | -1.48033700 | -3.50414500 | -0.69749400 |
| C | -1.03685500 | -2.38970800 | 0.04740900  |

|   |             |             |             |
|---|-------------|-------------|-------------|
| C | 0.17874400  | -2.51316700 | 0.75832800  |
| C | 0.90032000  | -3.70108100 | 0.73716800  |
| H | 1.00267100  | -5.72588500 | -0.00894600 |
| H | -1.12394200 | -5.53857200 | -1.29042000 |
| H | -2.40615400 | -3.42431200 | -1.26224900 |
| H | 0.57233200  | -1.66180400 | 1.30578100  |
| H | 1.83708200  | -3.77042400 | 1.28389400  |
| C | -1.81898500 | -1.17155600 | 0.03652100  |
| H | -2.60158300 | -1.09750900 | -0.71297800 |
| C | -1.58873400 | -0.07217100 | 0.83753500  |
| C | -2.48036100 | 1.10694300  | 0.87160900  |
| O | -2.43903700 | 1.96778500  | 1.73776000  |
| O | -3.33513600 | 1.15111900  | -0.17105500 |
| C | -4.19290200 | 2.31092500  | -0.23746600 |
| H | -4.81169900 | 2.34854000  | 0.66557000  |
| H | -3.56877400 | 3.21083500  | -0.24739200 |
| C | -5.02440400 | 2.17682300  | -1.49890200 |
| H | -5.69365200 | 3.03817600  | -1.59992800 |
| H | -4.37969300 | 2.13066200  | -2.38227200 |
| H | -5.63251300 | 1.26691300  | -1.46765300 |
| H | -0.98994400 | -0.17388000 | 1.73510500  |

TS3-2b'

|   |             |             |             |
|---|-------------|-------------|-------------|
| C | 2.81716200  | -0.42783300 | 1.26578900  |
| C | 1.91607100  | -1.19359200 | 0.51494000  |
| C | 2.38932000  | -2.16476300 | -0.37426200 |
| C | 3.76375200  | -2.36087000 | -0.51094500 |
| C | 4.66760400  | -1.60715200 | 0.24019000  |
| C | 4.18862400  | -0.64282400 | 1.12873800  |
| H | 2.45342100  | 0.35448400  | 1.92372500  |
| H | 1.68644600  | -2.74528100 | -0.95879600 |
| H | 4.12622000  | -3.11393700 | -1.20515800 |
| H | 5.73642200  | -1.76776900 | 0.13169300  |
| H | 4.88206600  | -0.04204900 | 1.71072400  |
| N | 0.50694900  | -0.94508000 | 0.65104900  |
| C | -0.26445300 | -0.78373500 | -0.44901700 |
| O | -0.08373100 | -1.13868900 | -1.58322400 |
| C | -0.03981300 | -0.69010600 | 1.98669700  |
| H | -1.12705000 | -0.75920900 | 1.94049800  |
| H | 0.33653300  | -1.46260800 | 2.66297000  |
| H | 0.24099700  | 0.29486000  | 2.37024100  |
| C | -5.46383900 | -1.10366900 | -0.00714300 |
| C | -4.74880300 | -1.12883300 | -1.20689900 |
| C | -3.51960900 | -0.48066500 | -1.30246500 |
| C | -2.97808900 | 0.20822400  | -0.20304900 |
| C | -3.70509600 | 0.22071300  | 0.99957600  |
| C | -4.93574500 | -0.42695100 | 1.09481200  |
| H | -6.42350600 | -1.60742200 | 0.06926500  |
| H | -5.14879900 | -1.65511800 | -2.06941600 |
| H | -2.95474500 | -0.51646000 | -2.23027900 |
| H | -3.31432500 | 0.74424200  | 1.86728500  |
| H | -5.48487100 | -0.40126400 | 2.03236000  |
| C | -1.65707200 | 0.85877700  | -0.35670800 |
| H | -1.31751300 | 0.96292500  | -1.38257500 |
| C | -1.10453500 | 1.74432300  | 0.56275000  |
| C | 0.24599000  | 2.28153900  | 0.42720900  |
| O | 0.86491300  | 2.80887500  | 1.34314700  |
| O | 0.78073500  | 2.04678700  | -0.79828700 |

|   |             |            |             |
|---|-------------|------------|-------------|
| C | 2.18031000  | 2.34930700 | -0.97883900 |
| H | 2.28826300  | 3.42895200 | -1.13632400 |
| H | 2.72295800  | 2.08596100 | -0.06723000 |
| C | 2.65735100  | 1.54145600 | -2.17166500 |
| H | 3.72035700  | 1.73448900 | -2.35363700 |
| H | 2.52246400  | 0.47199300 | -1.98316300 |
| H | 2.09519400  | 1.80621700 | -3.07298600 |
| H | -1.53929000 | 1.90668300 | 1.54212300  |

TS3-4a

|   |             |             |             |
|---|-------------|-------------|-------------|
| C | 3.26745300  | -1.75876800 | -0.46929800 |
| C | 2.95167500  | -0.39562800 | -0.44585200 |
| C | 3.97209900  | 0.55832400  | -0.35634000 |
| C | 5.30350900  | 0.14682000  | -0.29342500 |
| C | 5.62433800  | -1.21073300 | -0.31181400 |
| C | 4.60150900  | -2.15720200 | -0.39806800 |
| H | 2.47873100  | -2.49716400 | -0.53977200 |
| H | 3.73187000  | 1.61567400  | -0.32841100 |
| H | 6.08890700  | 0.89427300  | -0.22391000 |
| H | 6.66158900  | -1.52879900 | -0.26063500 |
| H | 4.83943200  | -3.21696000 | -0.41963500 |
| N | 1.58211500  | 0.05121300  | -0.53061700 |
| C | 0.61759900  | -0.59797300 | 0.14146600  |
| O | 0.63014400  | -1.63620300 | 0.74734800  |
| C | 1.29427200  | 1.28447500  | -1.27894700 |
| H | 0.25702700  | 1.27300500  | -1.60457500 |
| H | 1.47420600  | 2.17372500  | -0.66738800 |
| H | 1.94396500  | 1.30458600  | -2.15643500 |
| C | -0.30784600 | 4.43390300  | 1.42449300  |
| C | 0.26976200  | 3.35234100  | 2.09506200  |
| C | -0.10520400 | 2.05344600  | 1.76679400  |
| C | -1.04758800 | 1.79985900  | 0.75065900  |
| C | -1.63407800 | 2.89705900  | 0.09850000  |
| C | -1.26608900 | 4.19860300  | 0.43694800  |
| H | -0.02053300 | 5.45083200  | 1.67684300  |
| H | 1.00546500  | 3.52083900  | 2.87655700  |
| H | 0.34538600  | 1.21392100  | 2.29111200  |
| H | -2.38003100 | 2.74988500  | -0.67071300 |
| H | -1.73341000 | 5.03338700  | -0.07774100 |
| C | -1.37620400 | 0.38032800  | 0.48734600  |
| H | -1.31327100 | -0.23936800 | 1.37429800  |
| C | -2.22061900 | -0.19405900 | -0.45674600 |
| C | -2.62607600 | -1.62046100 | -0.37711500 |
| O | -3.00026000 | -2.29034100 | -1.31707100 |
| O | -2.44844200 | -2.09668300 | 0.87390700  |
| C | -2.52006600 | -3.53240100 | 1.02953500  |
| H | -3.57145500 | -3.83657000 | 0.98268700  |
| H | -1.99700000 | -4.00333300 | 0.19202000  |
| C | -1.87622700 | -3.85883700 | 2.36341700  |
| H | -1.89276300 | -4.94086500 | 2.53368100  |
| H | -0.83771400 | -3.51400900 | 2.36930900  |
| H | -2.41131500 | -3.37097000 | 3.18476000  |
| N | -2.61501600 | 0.46580200  | -1.68364700 |
| O | -1.76818300 | 1.13179700  | -2.30107400 |
| O | -3.78477200 | 0.34445800  | -2.03709600 |

TS3-4a'

|   |            |             |            |
|---|------------|-------------|------------|
| C | 3.48210500 | -2.27037600 | 0.38139100 |
|---|------------|-------------|------------|



|   |             |             |             |
|---|-------------|-------------|-------------|
| C | 2.95020000  | -1.09804700 | -0.16723700 |
| C | 3.78107400  | -0.21583700 | -0.86779400 |
| C | 5.13548900  | -0.51031600 | -1.01150600 |
| C | 5.67050200  | -1.68196500 | -0.47161100 |
| C | 4.83804200  | -2.55940000 | 0.22289000  |
| H | 2.84802100  | -2.94984700 | 0.94076900  |
| H | 3.37027500  | 0.69357700  | -1.28872100 |
| H | 5.77343900  | 0.17968400  | -1.55677700 |
| H | 6.72647500  | -1.90709100 | -0.59007600 |
| H | 5.24161400  | -3.47128600 | 0.65423700  |
| N | 1.54231500  | -0.82152500 | -0.02540800 |
| C | 1.13209000  | 0.42032900  | 0.30049600  |
| O | 1.76141800  | 1.43820300  | 0.40835600  |
| C | 0.61274700  | -1.95414100 | -0.01739900 |
| H | -0.36600700 | -1.62279700 | -0.34796700 |
| H | 0.98110700  | -2.70537000 | -0.71901700 |
| H | 0.51876500  | -2.39130400 | 0.98037300  |
| C | -4.46782700 | -2.98796000 | -1.05040100 |
| C | -4.32250200 | -2.00653600 | -2.03523000 |
| C | -3.48430700 | -0.92048800 | -1.81665200 |
| C | -2.76565300 | -0.77217000 | -0.60533600 |
| C | -2.92466700 | -1.77983700 | 0.37791100  |
| C | -3.76223400 | -2.86623700 | 0.15052500  |
| H | -5.12213700 | -3.83892200 | -1.21688500 |
| H | -4.86285600 | -2.08998900 | -2.97412900 |
| H | -3.37687600 | -0.16044300 | -2.58670200 |
| H | -2.38614800 | -1.73220800 | 1.31523800  |
| H | -3.86657600 | -3.62543400 | 0.92072200  |
| C | -1.93291700 | 0.40415700  | -0.47521100 |
| H | -1.89599300 | 1.04724800  | -1.34976400 |
| C | -1.13373200 | 0.85760600  | 0.56198800  |
| C | -0.76793900 | 2.30872000  | 0.67410200  |
| O | -0.59622700 | 2.87544700  | 1.72771800  |
| O | -0.62094900 | 2.86319500  | -0.53968800 |
| C | -0.06523200 | 4.20200200  | -0.54219100 |
| H | -0.76727500 | 4.87598100  | -0.04078900 |
| H | 0.86288000  | 4.18254600  | 0.03604900  |
| C | 0.16517600  | 4.58118800  | -1.99155400 |
| H | 0.58902500  | 5.58947500  | -2.04974700 |
| H | 0.86343700  | 3.88304100  | -2.46408700 |
| H | -0.77426100 | 4.56775200  | -2.55388700 |
| N | -1.34063100 | 0.28038000  | 1.93150400  |
| O | -2.37938500 | 0.59892300  | 2.49223200  |
| O | -0.49125500 | -0.48086300 | 2.39205600  |

TS4-2b

|   |             |            |             |
|---|-------------|------------|-------------|
| C | -0.63705300 | 1.05877600 | 1.35023000  |
| C | -0.98066500 | 1.67394300 | 0.10201200  |
| C | -2.30414100 | 1.95823200 | -0.20672600 |
| C | -3.31659400 | 1.70970000 | 0.73146500  |
| C | -2.99736200 | 1.17286500 | 1.99137200  |
| C | -1.68338400 | 0.89136600 | 2.31314900  |
| H | 0.37263400  | 1.20581900 | 1.72523400  |
| H | -2.56203100 | 2.35250500 | -1.18443700 |
| H | -4.34831300 | 1.93181600 | 0.47684500  |
| H | -3.78478200 | 1.00824500 | 2.72199800  |
| H | -1.42313900 | 0.51301500 | 3.29784800  |
| N | 0.05294900  | 1.85219900 | -0.84547900 |

|   |             |             |             |
|---|-------------|-------------|-------------|
| C | 1.09172700  | 0.96235100  | -1.03122100 |
| O | 1.97296400  | 1.16499700  | -1.85705400 |
| C | -0.03343200 | 2.96709800  | -1.79451700 |
| H | 0.97618500  | 3.25211200  | -2.08822400 |
| H | -0.59028300 | 2.68158500  | -2.69517500 |
| H | -0.53688800 | 3.80449200  | -1.30779800 |
| C | 2.40126100  | -0.27921600 | 0.64829400  |
| C | 1.14300400  | -0.36483200 | -0.21482600 |
| H | 1.33878200  | -1.10997500 | -0.99363100 |
| C | -0.05817700 | -0.77735300 | 0.61315900  |
| H | 0.20456300  | -1.20151200 | 1.57930400  |
| C | -1.20946500 | -1.39394400 | -0.03273600 |
| C | -2.13862400 | -2.11616300 | 0.74656600  |
| C | -1.48303700 | -1.24042400 | -1.40862700 |
| C | -3.28213900 | -2.66562800 | 0.17760700  |
| H | -1.95118800 | -2.23591400 | 1.81064400  |
| C | -2.62717200 | -1.79522700 | -1.97684200 |
| H | -0.79471600 | -0.68716700 | -2.04098700 |
| C | -3.53386200 | -2.50841700 | -1.18916600 |
| H | -3.98042000 | -3.21985000 | 0.79952800  |
| H | -2.81257200 | -1.66895600 | -3.04048300 |
| H | -4.42596500 | -2.93967700 | -1.63503600 |
| O | 2.44117300  | 0.21050600  | 1.76055800  |
| O | 3.46007400  | -0.80041800 | 0.01886200  |
| C | 4.73174700  | -0.68243900 | 0.70509500  |
| H | 4.66636000  | -1.21588300 | 1.65932200  |
| H | 4.91091600  | 0.37475800  | 0.92533900  |
| C | 5.78640600  | -1.26636600 | -0.21420800 |
| H | 6.77254800  | -1.19563900 | 0.25740000  |
| H | 5.57733100  | -2.31987100 | -0.42567900 |
| H | 5.81241300  | -0.72190000 | -1.16305900 |

TS4-4a

|   |             |             |             |
|---|-------------|-------------|-------------|
| C | 1.35787800  | -0.17308200 | -1.02513700 |
| C | 2.33026200  | 0.43482400  | -0.16237100 |
| C | 3.58205400  | -0.15334600 | -0.00410600 |
| C | 3.90722000  | -1.32215000 | -0.70106900 |
| C | 2.97825200  | -1.91660500 | -1.57183300 |
| C | 1.74007800  | -1.33624500 | -1.75964100 |
| H | 0.58549100  | 0.45439100  | -1.45629400 |
| H | 4.30136100  | 0.27886000  | 0.68228300  |
| H | 4.88477300  | -1.77205700 | -0.55795500 |
| H | 3.24519200  | -2.81804500 | -2.11420900 |
| H | 1.01943400  | -1.76151000 | -2.44795300 |
| N | 1.94919300  | 1.55810000  | 0.59734600  |
| C | 0.73584200  | 1.65407400  | 1.27205400  |
| O | 0.55473800  | 2.53592900  | 2.09517500  |
| C | 2.98808200  | 2.48632000  | 1.05009800  |
| H | 2.52571200  | 3.45434300  | 1.23576400  |
| H | 3.45407800  | 2.14788500  | 1.98338500  |
| H | 3.74550400  | 2.57073500  | 0.26951500  |
| C | -3.41258200 | 2.65491900  | -1.50073700 |
| C | -3.78775000 | 1.72682000  | -0.52884700 |
| C | -2.81991100 | 1.11507700  | 0.26486100  |
| C | -1.46403800 | 1.41340700  | 0.09037500  |
| C | -1.09617000 | 2.35312900  | -0.87840500 |
| C | -2.06470200 | 2.96940700  | -1.66996200 |
| H | -4.16676100 | 3.13463600  | -2.11770500 |

|   |             |             |             |
|---|-------------|-------------|-------------|
| H | -4.83543100 | 1.48011700  | -0.38418100 |
| H | -3.11619400 | 0.38902200  | 1.01652200  |
| H | -0.05201400 | 2.62243100  | -1.00715400 |
| H | -1.76336800 | 3.69897300  | -2.41607700 |
| C | -0.43326300 | 0.69835800  | 0.95936300  |
| H | -0.88649600 | 0.55279100  | 1.94652300  |
| C | -0.04139800 | -0.68445000 | 0.44526600  |
| N | -1.14204900 | -1.38088900 | -0.25683400 |
| O | -1.87877200 | -2.06417500 | 0.45340500  |
| O | -1.29786200 | -1.19470600 | -1.46026300 |
| C | 0.72792800  | -1.60847900 | 1.30870000  |
| O | 0.91690800  | -2.78291700 | 1.07330000  |
| O | 1.29831900  | -0.92734800 | 2.32848500  |
| C | 2.28308800  | -1.65098100 | 3.09888400  |
| H | 1.77265700  | -2.43191700 | 3.67072300  |
| H | 2.97397700  | -2.13730500 | 2.40430000  |
| C | 2.97554000  | -0.64262100 | 3.99297800  |
| H | 3.71396700  | -1.14750400 | 4.62463800  |
| H | 3.49271600  | 0.11392700  | 3.39372700  |
| H | 2.25451500  | -0.13286100 | 4.63899700  |

TS5-2b

|   |             |             |             |
|---|-------------|-------------|-------------|
| C | -0.37253100 | -0.33020300 | 0.80587400  |
| C | -1.17141100 | 0.46568200  | 1.73620300  |
| C | -1.64214000 | -0.08422500 | 2.90636100  |
| C | -1.51556100 | -1.48944500 | 3.12324800  |
| C | -0.90788300 | -2.32118100 | 2.23161300  |
| C | -0.25249100 | -1.77888900 | 1.07180600  |
| H | 0.87095100  | 0.02310700  | 1.01180800  |
| H | -2.17118800 | 0.50626000  | 3.64282600  |
| H | -1.97366700 | -1.90609000 | 4.01900100  |
| H | -0.87299100 | -3.39375200 | 2.39321900  |
| H | -0.19191700 | -2.40942400 | 0.19126000  |
| N | -1.44650400 | 1.81345700  | 1.41599300  |
| C | -1.27235300 | 2.36443900  | 0.15216300  |
| O | -1.74549900 | 3.45284500  | -0.15022200 |
| C | -2.10779400 | 2.65473500  | 2.40863000  |
| H | -2.14838800 | 3.66664800  | 2.01172400  |
| H | -3.12837400 | 2.30491800  | 2.60862400  |
| H | -1.53574500 | 2.63904200  | 3.34092000  |
| C | 1.01226700  | 2.11549600  | -0.72310000 |
| C | -0.42565600 | 1.58291000  | -0.83771100 |
| H | -0.78403100 | 1.86299800  | -1.83309700 |
| C | -0.48130100 | 0.04510300  | -0.68752400 |
| H | 0.40800700  | -0.35693500 | -1.17675700 |
| C | -1.69290900 | -0.57994000 | -1.35768800 |
| C | -1.49873600 | -1.66270700 | -2.22752200 |
| C | -3.00617000 | -0.14892300 | -1.11562100 |
| C | -2.58206800 | -2.29784200 | -2.83817700 |
| H | -0.48415100 | -2.00838600 | -2.41180100 |
| C | -4.08957800 | -0.77719400 | -1.72936000 |
| H | -3.18697400 | 0.68137400  | -0.43927300 |
| C | -3.88293100 | -1.85553300 | -2.59364500 |
| H | -2.40712000 | -3.13806900 | -3.50636800 |
| H | -5.09909900 | -0.42445000 | -1.53002700 |
| H | -4.72889500 | -2.34595000 | -3.06986300 |
| O | 1.38974500  | 2.91602700  | 0.10383600  |
| O | 1.77181000  | 1.58393400  | -1.68851600 |

|   |            |             |             |
|---|------------|-------------|-------------|
| C | 3.20553600 | 1.74461300  | -1.53768300 |
| H | 3.45299700 | 1.53731400  | -0.49495400 |
| H | 3.46449100 | 2.78486500  | -1.77174600 |
| C | 3.85534100 | 0.74775900  | -2.47772200 |
| H | 4.94664700 | 0.82255700  | -2.39933400 |
| H | 3.54567900 | -0.26297400 | -2.19621500 |
| H | 3.56702800 | 0.94139300  | -3.51810400 |
| S | 2.55692100 | -1.44299100 | 0.61603900  |
| O | 2.27546200 | -1.72904600 | -0.81957800 |
| O | 2.19566300 | 0.05059000  | 0.92349600  |
| O | 1.52231200 | -2.22306100 | 1.49831600  |
| O | 3.92072500 | -1.73862700 | 1.07000800  |

TS5-4a

|   |             |             |             |
|---|-------------|-------------|-------------|
| C | -0.44563700 | -0.58075800 | -0.17872800 |
| C | -1.23334500 | -0.44505000 | 1.05110200  |
| C | -2.17761900 | -1.36497300 | 1.41360800  |
| C | -2.56084800 | -2.40326400 | 0.49070000  |
| C | -1.94340000 | -2.58215900 | -0.69177800 |
| C | -0.73818700 | -1.79278300 | -1.06106500 |
| H | 0.84977500  | -1.08747500 | 0.38459800  |
| H | -2.68532100 | -1.31385000 | 2.36811500  |
| H | -3.40453800 | -3.03494800 | 0.76405100  |
| H | -2.27093600 | -3.34092300 | -1.39654300 |
| H | -0.77044700 | -1.50257400 | -2.11206000 |
| N | -0.98590600 | 0.67961000  | 1.88871200  |
| C | -0.52328700 | 1.88443100  | 1.40642200  |
| O | -0.57270000 | 2.92028300  | 2.06141200  |
| C | -1.52896300 | 0.69052600  | 3.24316500  |
| H | -1.08482200 | 1.52884700  | 3.77689200  |
| H | -2.61956200 | 0.81657500  | 3.23793900  |
| H | -1.27830100 | -0.25122000 | 3.73702300  |
| C | 4.46823900  | 2.03521700  | 0.60094000  |
| C | 3.84133000  | 2.88073200  | -0.31610600 |
| C | 2.45764800  | 2.83026300  | -0.48030600 |
| C | 1.68125400  | 1.93553100  | 0.26723800  |
| C | 2.31656700  | 1.10058700  | 1.19304800  |
| C | 3.70091100  | 1.14524300  | 1.35288300  |
| H | 5.54830600  | 2.06590200  | 0.72386400  |
| H | 4.42866100  | 3.57754200  | -0.90939400 |
| H | 1.97345700  | 3.47326200  | -1.20924000 |
| H | 1.73761800  | 0.40091300  | 1.78341200  |
| H | 4.17581200  | 0.47017000  | 2.05919900  |
| C | 0.17057500  | 1.89465300  | 0.04597500  |
| H | -0.12175700 | 2.84025400  | -0.41361400 |
| C | -0.29672500 | 0.74928300  | -0.90188000 |
| N | 0.72687200  | 0.73659300  | -2.04824100 |
| O | 0.70125900  | 1.72765800  | -2.78212600 |
| O | 1.52393700  | -0.18058900 | -2.12806600 |
| C | -1.64912700 | 1.03769300  | -1.56252100 |
| O | -2.01767100 | 0.60584600  | -2.63333500 |
| O | -2.43988400 | 1.70506000  | -0.69215600 |
| C | -3.86461700 | 1.67309000  | -0.91086200 |
| H | -4.14846100 | 2.58229000  | -1.45394800 |
| H | -4.10664700 | 0.80948200  | -1.53587000 |
| C | -4.51684400 | 1.59362900  | 0.45912600  |
| H | -5.60914200 | 1.60693100  | 0.36326100  |
| H | -4.20990500 | 0.66754500  | 0.95570900  |

|   |             |             |             |
|---|-------------|-------------|-------------|
| H | -4.20716200 | 2.43929400  | 1.08223700  |
| S | 1.25235000  | -3.21086800 | 0.17312400  |
| O | 0.34749600  | -3.89379800 | 1.10127300  |
| O | 1.66897200  | -1.80409900 | 0.74815800  |
| O | 2.42334300  | -3.93475300 | -0.30782500 |
| O | 0.44418000  | -2.76797000 | -1.16542000 |

TS6-2b

|   |             |             |             |
|---|-------------|-------------|-------------|
| C | 0.90274700  | 0.31929500  | 0.98187200  |
| C | 2.29957800  | 0.48551200  | 0.89077900  |
| C | 3.10288400  | 0.20703500  | 2.00512900  |
| C | 2.52180900  | -0.22731300 | 3.19783300  |
| C | 1.13941500  | -0.38290900 | 3.29458500  |
| C | 0.33603600  | -0.11144900 | 2.18825100  |
| H | 4.17990500  | 0.31578300  | 1.95053500  |
| H | 3.16213900  | -0.44486100 | 4.04966600  |
| H | 0.68588000  | -0.72690700 | 4.22002400  |
| H | -0.74227900 | -0.25718300 | 2.22651800  |
| N | 2.87575300  | 0.97598900  | -0.30857200 |
| C | 2.19727600  | 1.02007000  | -1.51320900 |
| O | 2.69827000  | 1.48047700  | -2.53207800 |
| C | 4.25382500  | 1.45185200  | -0.29724400 |
| H | 4.44467900  | 1.93474300  | -1.25388000 |
| H | 4.39850900  | 2.16677200  | 0.51965300  |
| H | 4.95731800  | 0.61973100  | -0.16919100 |
| C | 0.88207800  | -1.03903800 | -1.99870500 |
| C | 0.78674800  | 0.42448000  | -1.53907100 |
| H | 0.26197800  | 0.94737200  | -2.33737500 |
| C | 0.03785200  | 0.56504600  | -0.20272400 |
| H | -0.73075600 | -0.46233700 | -0.19072300 |
| C | -0.89786200 | 1.73176400  | -0.13581500 |
| C | -1.99362600 | 1.78692700  | -1.01530400 |
| C | -0.70639700 | 2.78475700  | 0.77287900  |
| C | -2.86200000 | 2.87411900  | -0.99249000 |
| H | -2.20201000 | 0.94130000  | -1.66188900 |
| C | -1.57085600 | 3.87828500  | 0.78405800  |
| H | 0.12806000  | 2.74344300  | 1.46627600  |
| C | -2.65056300 | 3.92843500  | -0.10025100 |
| H | -3.72067800 | 2.88384800  | -1.65831800 |
| H | -1.40208700 | 4.69075500  | 1.48746600  |
| H | -3.33180200 | 4.77620200  | -0.08337800 |
| O | 0.51738700  | -1.43982900 | -3.07872400 |
| O | 1.40966700  | -1.79722500 | -1.02410100 |
| C | 1.17862900  | -3.22467900 | -1.09216800 |
| H | 1.99337000  | -3.67825700 | -1.67054600 |
| H | 0.23456700  | -3.39538700 | -1.61334400 |
| C | 1.12210700  | -3.72315100 | 0.34001300  |
| H | 1.00046700  | -4.81288600 | 0.35273900  |
| H | 2.03950200  | -3.46412600 | 0.88057100  |
| H | 0.26766600  | -3.26299200 | 0.84222900  |
| S | -2.86772300 | -1.45086000 | 0.33051300  |
| O | -2.76964800 | -0.65809100 | 1.58223700  |
| O | -3.15184100 | -2.90089400 | 0.52465400  |
| O | -3.66678400 | -0.80040400 | -0.73198400 |
| O | -1.33070500 | -1.58745800 | -0.22697300 |

TS6'-4a

|   |            |             |            |
|---|------------|-------------|------------|
| C | 1.26608100 | -1.63518200 | 0.39519800 |
|---|------------|-------------|------------|

|   |             |             |             |
|---|-------------|-------------|-------------|
| C | 1.69722900  | -1.74048100 | -0.94378300 |
| C | 3.00027900  | -2.20739300 | -1.19588300 |
| C | 3.83556700  | -2.57795100 | -0.14822800 |
| C | 3.39845400  | -2.49698800 | 1.17415600  |
| C | 2.11443100  | -2.02766700 | 1.43079100  |
| H | 3.36744200  | -2.26062200 | -2.21208200 |
| H | 4.84003900  | -2.92835400 | -0.37210400 |
| H | 4.04737500  | -2.79219700 | 1.99337300  |
| H | 1.75553200  | -1.96403600 | 2.45183700  |
| N | 0.84431800  | -1.39563000 | -1.99320700 |
| C | -0.28858600 | -0.60232100 | -1.78064800 |
| O | -0.88124000 | -0.11987800 | -2.77020200 |
| C | 1.30439100  | -1.54073100 | -3.36811100 |
| H | 0.46815600  | -1.28380600 | -4.01342700 |
| H | 2.12869100  | -0.84866100 | -3.56917800 |
| H | 1.61715600  | -2.57396500 | -3.54923500 |
| C | -4.44362200 | 1.67796900  | 0.22886800  |
| C | -3.26575200 | 2.27757900  | 0.67088800  |
| C | -2.03579200 | 1.66058700  | 0.44021200  |
| C | -1.95632600 | 0.42458600  | -0.21767700 |
| C | -3.14895100 | -0.15800500 | -0.67258400 |
| C | -4.37750500 | 0.46086300  | -0.45245800 |
| H | -5.40394400 | 2.15824300  | 0.40269600  |
| H | -3.29789700 | 3.23704000  | 1.18177800  |
| H | -1.12030900 | 2.15583500  | 0.74342300  |
| H | -3.09990500 | -1.10189500 | -1.20010100 |
| H | -5.28876300 | -0.01139400 | -0.81273500 |
| C | -0.61783700 | -0.24311900 | -0.41735400 |
| H | 0.37189200  | 0.89385400  | -0.34198500 |
| C | -0.14514200 | -1.17810600 | 0.65286000  |
| N | -0.97564200 | -2.56194000 | 0.71216500  |
| O | -0.74694500 | -3.30304800 | 1.66076900  |
| O | -1.70571500 | -2.83537000 | -0.23232400 |
| C | -0.38851800 | -0.52843400 | 2.02287100  |
| O | -1.32730300 | -0.74132200 | 2.75245800  |
| O | 0.54527400  | 0.41261400  | 2.23595900  |
| C | 0.29217100  | 1.34522900  | 3.30453200  |
| H | -0.73119100 | 1.71823400  | 3.19945200  |
| H | 0.36060100  | 0.81771300  | 4.26271200  |
| C | 1.32499500  | 2.44704400  | 3.16488300  |
| H | 1.15132500  | 3.22397100  | 3.91842600  |
| H | 2.33589800  | 2.04889500  | 3.30007600  |
| H | 1.26852900  | 2.88897200  | 2.16608800  |
| S | 1.27746200  | 2.42817500  | -1.77272600 |
| O | -0.21572900 | 2.50630800  | -2.40423200 |
| O | 2.05582000  | 1.47269300  | -2.57065100 |
| O | 1.73090600  | 3.80867200  | -1.67386100 |
| O | 1.04449700  | 1.85973800  | -0.33093900 |
| H | -0.52965700 | 1.58541100  | -2.63373300 |

TS6-4a

|   |            |             |             |
|---|------------|-------------|-------------|
| C | 1.13827100 | -1.03193900 | 0.98056800  |
| C | 1.79741100 | -1.48163300 | -0.17857600 |
| C | 3.19118700 | -1.65142000 | -0.13133700 |
| C | 3.89410400 | -1.41301500 | 1.04258000  |
| C | 3.23208700 | -1.00991200 | 2.20244800  |
| C | 1.85741100 | -0.81878300 | 2.15731100  |
| H | 3.73330800 | -1.93059600 | -1.02401900 |

|   |             |             |             |
|---|-------------|-------------|-------------|
| H | 4.97428900  | -1.53561600 | 1.04442500  |
| H | 3.78092100  | -0.82515300 | 3.12124500  |
| H | 1.32593900  | -0.48985900 | 3.04384700  |
| N | 1.07955700  | -1.78509100 | -1.34763000 |
| C | -0.23511500 | -1.38701800 | -1.55050800 |
| O | -0.84230600 | -1.65725100 | -2.58055700 |
| C | 1.78928900  | -2.33803300 | -2.49751100 |
| H | 1.04709900  | -2.56705700 | -3.25889800 |
| H | 2.49033400  | -1.59053000 | -2.88015900 |
| H | 2.31766400  | -3.25358000 | -2.21074400 |
| C | -4.96141500 | 0.64240100  | -0.90704500 |
| C | -3.99526800 | 1.58265500  | -0.54913800 |
| C | -2.65885400 | 1.20357000  | -0.42991200 |
| C | -2.26363500 | -0.12396500 | -0.66078600 |
| C | -3.24119700 | -1.05845300 | -1.04058600 |
| C | -4.57644300 | -0.67709600 | -1.15528000 |
| H | -6.00481100 | 0.93564700  | -0.99964700 |
| H | -4.27641700 | 2.61765300  | -0.37030100 |
| H | -1.90639900 | 1.94622200  | -0.19065300 |
| H | -2.94447500 | -2.07880700 | -1.23876100 |
| H | -5.32008700 | -1.41687300 | -1.44268700 |
| C | -0.82240500 | -0.51241600 | -0.48396500 |
| H | -0.14940100 | 0.62116400  | -0.80329700 |
| C | -0.35319900 | -0.81378200 | 0.93423100  |
| N | -0.97572600 | -2.16654700 | 1.46218900  |
| O | -0.79970800 | -2.42652100 | 2.64361000  |
| O | -1.51670000 | -2.90736400 | 0.64831600  |
| C | -0.86710200 | 0.29185600  | 1.88490700  |
| O | -1.83535600 | 0.21144500  | 2.60431100  |
| O | -0.11612600 | 1.37272300  | 1.69550600  |
| C | -0.52626900 | 2.62111800  | 2.29278700  |
| H | -1.61272600 | 2.71722400  | 2.19033200  |
| H | -0.29177200 | 2.58131400  | 3.36361700  |
| C | 0.24099100  | 3.71051000  | 1.56564100  |
| H | 0.02523600  | 4.68555400  | 2.01930400  |
| H | 1.31379600  | 3.50699000  | 1.60468800  |
| H | -0.03075700 | 3.72912900  | 0.50704800  |
| S | 1.88859500  | 1.83498500  | -1.33114100 |
| O | 1.87473800  | 3.20490600  | -1.94061500 |
| O | 2.35421000  | 0.76185900  | -2.23755700 |
| O | 2.46150900  | 1.78077100  | 0.02799000  |
| O | 0.26284500  | 1.68956100  | -1.21525000 |

TS7-2b

|   |            |             |             |
|---|------------|-------------|-------------|
| C | 1.66925200 | 0.89414700  | -0.29425300 |
| C | 2.81311300 | 0.27299800  | 0.24927100  |
| C | 4.06978000 | 0.88909300  | 0.06830600  |
| C | 4.18816300 | 2.07913400  | -0.64263100 |
| C | 3.05944500 | 2.69088200  | -1.18671200 |
| C | 1.81705600 | 2.08888200  | -1.00421900 |
| H | 4.95958700 | 0.43905200  | 0.49110000  |
| H | 5.17153700 | 2.52832300  | -0.76485300 |
| H | 3.14252700 | 3.61708600  | -1.74889200 |
| H | 0.92966000 | 2.54605000  | -1.42873600 |
| N | 2.70318800 | -0.91859200 | 0.96179900  |
| C | 1.46098600 | -1.40340900 | 1.44741100  |
| O | 1.46394100 | -2.31446200 | 2.27444300  |
| C | 3.90088700 | -1.61187500 | 1.40597000  |

|    |             |             |             |
|----|-------------|-------------|-------------|
| H  | 3.58014000  | -2.55175300 | 1.85159500  |
| H  | 4.56631200  | -1.80297800 | 0.55607800  |
| H  | 4.45109400  | -1.03615900 | 2.16383400  |
| C  | -0.95716000 | -0.91105100 | 1.71849000  |
| C  | 0.24661400  | -0.85615200 | 0.85183700  |
| H  | -0.08741800 | -1.99719300 | -0.06159400 |
| C  | 0.29799000  | 0.23789800  | -0.20573300 |
| C  | -0.77029400 | 1.32172800  | -0.00705000 |
| C  | -0.77220500 | 2.03092600  | 1.20317800  |
| C  | -1.70325100 | 1.66230900  | -0.98853700 |
| C  | -1.69903800 | 3.04515800  | 1.43521500  |
| H  | -0.05228400 | 1.76862100  | 1.97277700  |
| C  | -2.62911000 | 2.68357000  | -0.75702000 |
| H  | -1.72816600 | 1.10459300  | -1.91402400 |
| C  | -2.63513200 | 3.37837100  | 0.45254800  |
| H  | -1.68902400 | 3.57450800  | 2.38520900  |
| H  | -3.35508800 | 2.92716300  | -1.52962200 |
| H  | -3.36097100 | 4.16873600  | 0.63055400  |
| O  | -1.02137200 | -0.92638100 | 2.93364500  |
| O  | -2.07458100 | -0.92921800 | 0.93661200  |
| C  | -3.33171400 | -0.75664500 | 1.59524600  |
| H  | -3.28601800 | 0.13342200  | 2.23461400  |
| H  | -3.52114600 | -1.61971900 | 2.24573100  |
| C  | -4.37912300 | -0.62023300 | 0.50283500  |
| H  | -5.38236700 | -0.55046500 | 0.94202700  |
| H  | -4.18548700 | 0.27657200  | -0.09199100 |
| H  | -4.33650800 | -1.48035300 | -0.17160600 |
| S  | -0.68076600 | -1.59783600 | -2.11010300 |
| O  | -0.05571400 | -2.00871900 | -3.36257400 |
| O  | 0.18329000  | -0.28423900 | -1.64123200 |
| O  | -2.10614100 | -1.25774400 | -2.14264000 |
| O  | -0.35492000 | -2.62228300 | -0.97301200 |
| 1a |             |             |             |
| C  | -1.98351400 | -0.27166000 | -0.13951800 |
| C  | -0.65411800 | 0.11873700  | 0.03802400  |
| C  | -0.32920800 | 1.47449200  | 0.12824500  |
| C  | -1.33553700 | 2.43357100  | 0.03560800  |
| C  | -2.66349600 | 2.04782800  | -0.15541500 |
| C  | -2.98465600 | 0.69299500  | -0.24305800 |
| H  | -2.23318600 | -1.32769800 | -0.18255000 |
| H  | 0.70302800  | 1.76761900  | 0.27999700  |
| H  | -1.07893300 | 3.48634100  | 0.10865100  |
| H  | -3.44408700 | 2.79906000  | -0.23114800 |
| H  | -4.01640000 | 0.38314900  | -0.38126300 |
| N  | 0.37506900  | -0.87894900 | 0.10418700  |
| C  | 1.21422700  | -0.88404000 | 1.18439000  |
| O  | 1.11594200  | -0.15311500 | 2.15747500  |
| C  | 0.54049100  | -1.76689300 | -1.05236900 |
| H  | 0.92953000  | -2.73737500 | -0.74386700 |
| H  | -0.43527600 | -1.91697300 | -1.51514500 |
| H  | 1.22442000  | -1.33379900 | -1.78915800 |
| C  | 2.41570500  | -1.83425100 | 1.10384600  |
| O  | 3.19001000  | -1.88324200 | 0.17314900  |
| O  | 2.56099200  | -2.53262300 | 2.24169700  |
| H  | 3.39401600  | -3.03424200 | 2.15012600  |
| 2b |             |             |             |
| C  | -4.34545700 | -1.00716700 | 0.11924500  |



|   |             |             |             |
|---|-------------|-------------|-------------|
| C | -3.30045900 | -0.63987200 | 0.96687200  |
| C | -2.71583100 | 0.61832300  | 0.84445500  |
| C | -3.16101600 | 1.53406600  | -0.12440400 |
| C | -4.21621700 | 1.14783900  | -0.97177100 |
| C | -4.80013200 | -0.10752200 | -0.85014700 |
| H | -4.80469200 | -1.98720200 | 0.21087700  |
| H | -2.94078400 | -1.33215300 | 1.72262900  |
| H | -1.90137100 | 0.90437600  | 1.50516400  |
| H | -4.58025800 | 1.83485800  | -1.72904400 |
| H | -5.61370300 | -0.38874200 | -1.51269000 |
| C | -2.50815600 | 2.84014000  | -0.20492100 |
| H | -1.70722800 | 3.00795500  | 0.51139300  |
| C | -2.79246300 | 3.83846100  | -1.06070400 |
| C | -2.08853100 | 5.13264700  | -1.08271200 |
| O | -2.35311900 | 6.03053000  | -1.86103000 |
| O | -1.11252200 | 5.22569000  | -0.14601900 |
| C | -0.39033700 | 6.47290900  | -0.12307900 |
| H | 0.06613400  | 6.63658200  | -1.10458900 |
| H | -1.09862200 | 7.28964900  | 0.04970500  |
| C | 0.64615700  | 6.37391600  | 0.97890400  |
| H | 1.22227200  | 7.30375300  | 1.03437000  |
| H | 0.16818200  | 6.20544200  | 1.94924900  |
| H | 1.33980900  | 5.54876100  | 0.78818500  |
| H | -3.57359000 | 3.76307600  | -1.80997600 |

4a

|   |             |             |             |
|---|-------------|-------------|-------------|
| C | -4.75692900 | -0.78300000 | 0.27135100  |
| C | -3.76468600 | -0.77370900 | -0.71196800 |
| C | -2.98670500 | 0.35995600  | -0.92050600 |
| C | -3.19232100 | 1.51397200  | -0.14004700 |
| C | -4.17755300 | 1.48078300  | 0.86482800  |
| C | -4.95987800 | 0.34817200  | 1.06338500  |
| H | -5.36152000 | -1.67189500 | 0.42586900  |
| H | -3.59105700 | -1.65796000 | -1.31767600 |
| H | -2.19987900 | 0.32821600  | -1.66344900 |
| H | -4.33191500 | 2.36147800  | 1.48267600  |
| H | -5.72194000 | 0.34554400  | 1.83692800  |
| C | -2.43651500 | 2.75289200  | -0.29312100 |
| H | -2.48175800 | 3.43772800  | 0.54925200  |
| C | -1.70802800 | 3.20577200  | -1.32694800 |
| N | -1.57620400 | 2.44908700  | -2.58728100 |
| O | -2.50399600 | 2.52302000  | -3.38250600 |
| O | -0.54724700 | 1.79575600  | -2.73379500 |
| C | -0.98290600 | 4.49586600  | -1.38016300 |
| O | -0.39120100 | 4.88949900  | -2.36305500 |
| O | -1.07463500 | 5.16879100  | -0.21767500 |
| C | -0.41283500 | 6.45696100  | -0.19188300 |
| H | 0.64747800  | 6.30685200  | -0.41547300 |
| H | -0.83610600 | 7.08155000  | -0.98423400 |
| C | -0.63306500 | 7.04656900  | 1.18610600  |
| H | -0.14638800 | 8.02532000  | 1.25119400  |
| H | -1.70064600 | 7.17824300  | 1.38856800  |
| H | -0.20986400 | 6.39863600  | 1.96004500  |

## References

1. Frisch, M. J. T., G. W.; Schlegel, H. B.; Scuseria, G. E.; Robb, M. A.; Cheeseman, J. R.; Scalmani, G.; Barone, V.; Petersson, G. A.; Nakatsuji, H.; Li, X.; Caricato, M.; Marenich, A. V.; Bloino, J.; Janesko, B. G.; Gomperts, R.; Mennucci, B.; Hratchian, H. P.; Ortiz, J. V.; Izmaylov, A. F.; Sonnenberg, J. L.; Williams-Young, D.; Ding, F.; Lipparini, F.; Egidi, F.; Goings, J.; Peng, B.; Petrone, A.; Henderson, T.; Ranasinghe, D.; Zakrzewski, V. G.; Gao, J.; Rega, N.; Zheng, G.; Liang, W.; Hada, M.; Ehara, M.; Toyota, K.; Fukuda, R.; Hasegawa, J.; Ishida, M.; Nakajima, T.; Honda, Y.; Kitao, O.; Nakai, H.; Vreven, T.; Throssell, K.; Montgomery, J. A., Jr.; Peralta, J. E.; Ogliaro, F.; Bearpark, M. J.; Heyd, J. J.; Brothers, E. N.; Kudin, K. N.; Staroverov, V. N.; Keith, T. A.; Kobayashi, R.; Normand, J.; Raghavachari, K.; Rendell, A. P.; Burant, J. C.; Iyengar, S. S.; Tomasi, J.; Cossi, M.; Millam, J. M.; Klene, M.; Adamo, C.; Cammi, R.; Ochterski, J. W.; Martin, R. L.; Morokuma, K.; Farkas, O.; Foresman, J. B.; Fox, D. J. , Gaussian, Inc., Wallingford CT, 2016.
2. (a) S. Grimme, J. Antony, S. Ehrlich and H. Krieg, A consistent and accurate ab initio parametrization of density functional dispersion correction (DFT-D) for the 94 elements H-Pu, *J. Chem. Phys.*, 2010, **132**; (b) S. Grimme, S. Ehrlich and L. Goerigk, Effect of the damping function in dispersion corrected density functional theory, *J. Comput. Chem.*, 2011, **32**, 1456-1465; (c) C. Lee, W. Yang and R. G. Parr, Development of the Colle-Salvetti correlation-energy formula into a functional of the electron density, *Phys. Rev. B: Condens. Matter*, 1988, **37**, 785-789.
3. (a) A. V. Marenich, C. J. Cramer and D. G. Truhlar, Universal Solvation Model Based on Solute Electron Density and on a Continuum Model of the Solvent Defined by the Bulk Dielectric Constant and Atomic Surface Tensions, *J. Phys. Chem. B*, 2009, **113**, 6378-6396; (b) A. V. Marenich, C. J. Cramer and D. G. Truhlar, Performance of SM6, SM8, and SMD on the SAMPL1 Test Set for the Prediction of Small-Molecule Solvation Free Energies, *J. Phys. Chem. B*, 2009, **113**, 4538-4543.
4. Z. Shi, Y. Li, N. Li, W. Z. Wang, H. K. Lu, H. Yan, Y. Yuan, J. Zhu and K. Y. Ye, Electrochemical Migratory Cyclization of N-Acylsulfonamides, *Angew. Chem. Int. Ed.*, 2022, **61**, e202206058.
5. (a) K. Fukui, The Path of Chemical-Reactions - the Irc Approach, *Acc. Chem. Res.*, 1981, **14**, 363-368; (b) H. P. Hratchian and H. B. Schlegel, Accurate reaction paths using a Hessian based predictor-corrector integrator, *J. Chem. Phys.*, 2004, **120**, 9918-9924; (c) H. P. Hratchian and H. B. Schlegel, Using Hessian updating to increase the efficiency of a Hessian based predictor-corrector reaction path following method, *J. Chem. Theory. Comput.*, 2005, **1**, 61-69.
6. Legault, C. Y. CYLview; Université de Sherbrooke, Sherbrooke, Canada, 2009; <http://www.cylview.org>.
